# Supplementary material for: Molecular Characterization of the Pediatric Preclinical Testing Panel
Source: Oxford University Press journal article supplement (doi:10.1158/1078-0432.ccr-07-5090), 2008-07-15
Supplement: 10780432ccr075090-sup-tab3.xls [file 10780432ccr075090-sup-tab3.xls]

## Sheet: 2808 variable in PPTP
Probe Set Name	Representative Public ID	Gene Title	Gene Symbol	Entrez Gene	Gene Ontology Biological Process
1552269_at	NM_138796	spermatogenesis associated 17	SPATA17	128153	---
1552309_a_at	NM_144573	nexilin (F actin binding protein)	NEXN	91624	7155 // cell adhesion // inferred from electronic annotation
1552316_a_at	NM_130759	GTPase, IMAP family member 1	GIMAP1	170575	---
1552365_at	NM_033128	scinderin	SCIN	85477	8285 // negative regulation of cell proliferation // inferred from mutant phenotype /// 17156 // calcium ion-dependent exocytosis // inferred from sequence or structural similarity /// 43065 // positive regulation of apoptosis // inferred from mutant phenotype /// 45010 // actin nucleation // inferred from sequence or structural similarity /// 45654 // positive regulation of megakaryocyte differe…
1552378_s_at	NM_172037	retinol dehydrogenase 10 (all-trans)	RDH10	157506	7601 // visual perception // inferred from direct assay /// 8152 // metabolism // inferred from electronic annotation
1552390_a_at	NM_173549	chromosome 8 open reading frame 47	C8orf47	203111	---
1552487_a_at	NM_001717	basonuclin 1	BNC1	646	6350 // transcription // inferred from electronic annotation /// 6355 // regulation of transcription, DNA-dependent // inferred from electronic annotation /// 8284 // positive regulation of cell proliferation // traceable author statement /// 8544 // epidermis development // traceable author statement
1552542_s_at	NM_138810	T-cell activation GTPase activating protein	TAGAP	117289	7165 // signal transduction // inferred from electronic annotation
1552563_a_at	NM_145656	chromosome 8 open reading frame 6	C8orf6	203081	---
1552573_s_at	NM_138731	mirror-image polydactyly 1	MIPOL1	145282	---
1552575_a_at	NM_153344	chromosome 6 open reading frame 141	C6orf141	135398	---
1552661_at	NM_032101	protocadherin gamma subfamily B, 7	PCDHGB7	56099	7155 // cell adhesion // inferred from electronic annotation /// 7156 // homophilic cell adhesion // inferred from electronic annotation
1552667_a_at	NM_005489	SH2 domain containing 3C	SH2D3C	10044	7242 // intracellular signaling cascade // inferred from electronic annotation /// 7264 // small GTPase mediated signal transduction // inferred from electronic annotation
1552691_at	NM_138450	ADP-ribosylation factor-like 11	ARL11	115761	6364 // rRNA processing // inferred from electronic annotation /// 7264 // small GTPase mediated signal transduction // inferred from electronic annotation /// 7046 // ribosome biogenesis // inferred from electronic annotation
1552701_a_at	NM_052889	caspase-1 dominant-negative inhibitor pseudo-ICE	COP1	114769	6508 // proteolysis // inferred from electronic annotation /// 42981 // regulation of apoptosis // inferred from electronic annotation
1552703_s_at	NM_052889	caspase 1, apoptosis-related cysteine peptidase (interleukin 1, beta, convertase) /// caspase-1 dominant-negative inhibitor pseudo-ICE	CASP1 /// COP1		6508 // proteolysis // inferred from direct assay /// 6508 // proteolysis // inferred from electronic annotation /// 7165 // signal transduction // traceable author statement /// 42981 // regulation of apoptosis // inferred from electronic annotation /// 43123 // positive regulation of I-kappaB kinase/NF-kappaB cascade // inferred from expression pattern /// 6508 // proteolysis // traceable autho…
1552721_a_at	NM_033136	fibroblast growth factor 1 (acidic)	FGF1	2246	74 // regulation of progression through cell cycle // inferred from electronic annotation /// 1525 // angiogenesis // inferred from electronic annotation /// 7165 // signal transduction // non-traceable author statement /// 7267 // cell-cell signaling // not recorded /// 8283 // cell proliferation // inferred from electronic annotation /// 9653 // morphogenesis // traceable author statement /// 3…
1552736_a_at	NM_138966	neuropilin (NRP) and tolloid (TLL)-like 1	NETO1	81832	---
1552742_at	NM_144633	potassium voltage-gated channel, subfamily H (eag-related), member 8	KCNH8	131096	160 // two-component signal transduction system (phosphorelay) // inferred from electronic annotation /// 6355 // regulation of transcription, DNA-dependent // inferred from electronic annotation /// 6811 // ion transport // inferred from electronic annotation /// 6813 // potassium ion transport // inferred from electronic annotation /// 6810 // transport // inferred from electronic annotation //…
1552754_a_at	AA640422	immunoglobulin superfamily, member 4D	IGSF4D	253559	---
1552763_at	NM_153704	transmembrane protein 67	TMEM67	91147	8152 // metabolism // inferred from electronic annotation
1552766_at	NM_147174	heparan sulfate 6-O-sulfotransferase 2	HS6ST2	90161	---
1552767_a_at	NM_147174	heparan sulfate 6-O-sulfotransferase 2	HS6ST2	90161	---
1552837_at	NM_173041	intestinal cell (MAK-like) kinase	ICK	22858	6468 // protein amino acid phosphorylation // inferred from direct assay /// 7165 // signal transduction // traceable author statement /// 7243 // protein kinase cascade // inferred from direct assay /// 7275 // development // inferred from electronic annotation /// 6468 // protein amino acid phosphorylation // inferred from electronic annotation
1552972_at	NM_152711	hypothetical gene supported by BC031979	LOC399978	399978	---
1553055_a_at	NM_144975	schlafen family member 5	SLFN5	162394	---
1553102_a_at	BC016647	coiled-coil domain containing 69	CCDC69	26112	---
1553105_s_at	NM_001943	desmoglein 2	DSG2	1829	7155 // cell adhesion // inferred from electronic annotation /// 7156 // homophilic cell adhesion // inferred from electronic annotation
1553132_a_at	NM_152332	membrane targeting (tandem) C2 domain containing 1	MTAC2D1	123036	---
1553147_at	NM_145000	hypothetical protein FLJ25422	FLJ25422	202151	46907 // intracellular transport // inferred from electronic annotation
1553194_at	NM_173808	neuronal growth regulator 1	NEGR1	257194	7155 // cell adhesion // inferred from electronic annotation
1553266_at	NM_144571	CCR4-NOT transcription complex, subunit 6-like	CNOT6L	246175	---
1553276_at	NM_152476	zinc finger protein 560	ZNF560	147741	6350 // transcription // inferred from electronic annotation /// 6355 // regulation of transcription, DNA-dependent // inferred from electronic annotation
1553311_at	NM_173644	chromosome 20 open reading frame 197	C20orf197	284756	---
1553394_a_at	NM_003221	transcription factor AP-2 beta (activating enhancer binding protein 2 beta)	TFAP2B	7021	6350 // transcription // inferred from electronic annotation /// 6357 // regulation of transcription from RNA polymerase II promoter // traceable author statement /// 7399 // nervous system development // traceable author statement /// 6355 // regulation of transcription, DNA-dependent // inferred from electronic annotation
1553402_a_at	NM_139011	hemochromatosis	HFE	3077	6461 // protein complex assembly // traceable author statement /// 6811 // ion transport // inferred from electronic annotation /// 6826 // iron ion transport // traceable author statement /// 6879 // iron ion homeostasis // traceable author statement /// 6898 // receptor mediated endocytosis // traceable author statement /// 19882 // antigen presentation // inferred from electronic annotation //…
1553422_s_at	NM_145892	ataxin 2-binding protein 1	A2BP1	54715	---
1553423_a_at	NM_144682	schlafen family member 13	SLFN13	146857	---
1553436_at	NM_173600	mucin 19, oligomeric	MUC19	283463	---
1553446_at	NM_173671	hypothetical protein FLJ37396	FLJ37396	285754	---
1553604_at	NM_152701	ATP-binding cassette, sub-family A (ABC1), member 13	ABCA13	154664	---
1553613_s_at	NM_001453	forkhead box C1	FOXC1	2296	6350 // transcription // inferred from electronic annotation /// 6355 // regulation of transcription, DNA-dependent // non-traceable author statement /// 7601 // visual perception // traceable author statement /// 9653 // morphogenesis // not recorded /// 6355 // regulation of transcription, DNA-dependent // inferred from electronic annotation
1553645_at	NM_173648	hypothetical protein FLJ39502	FLJ39502	285025	---
1553654_at	NM_153262	synaptotagmin XIV /// chr415 synaptotagmin	SYT14 /// CHR415SYT		6508 // proteolysis // inferred from electronic annotation
1553705_a_at	NM_000740	---	---		---
1553706_at	NM_153692	HtrA serine peptidase 4	HTRA4	203100	6508 // proteolysis // inferred from electronic annotation
1553710_at	NM_153027	hypothetical protein FLJ31659	FLJ31659	152756	---
1553734_at	NM_152327	adenylate kinase 7	AK7	122481	---
1553764_a_at	NM_032876	jub, ajuba homolog (Xenopus laevis)	JUB	84962	---
1553830_s_at	NM_005361	melanoma antigen family A, 2 /// melanoma antigen family A, 2B /// similar to Melanoma-associated antigen 2 (MAGE-2 antigen)	MAGEA2 /// MAGEA2B /// LOC653310		---
1553970_s_at	BC042510	carboxyl ester lipase (bile salt-stimulated lipase)	CEL	1056	6629 // lipid metabolism // inferred from sequence or structural similarity /// 6641 // triacylglycerol metabolism // Unknown /// 6641 // triacylglycerol metabolism // inferred from sequence or structural similarity /// 6707 // cholesterol catabolism // inferred from direct assay /// 6707 // cholesterol catabolism // inferred from sequence or structural similarity /// 6707 // cholesterol cataboli…
1553995_a_at	BC015940	5'-nucleotidase, ecto (CD73)	NT5E	4907	6259 // DNA metabolism // traceable author statement /// 9166 // nucleotide catabolism // inferred from electronic annotation
1554004_a_at	BC012946	Rho-guanine nucleotide exchange factor /// similar to Rho-guanine nucleotide exchange factor (Rho-interacting protein 2) (RhoGEF) (RIP2)	RGNEF /// LOC643607		7242 // intracellular signaling cascade // inferred from electronic annotation /// 35023 // regulation of Rho protein signal transduction // inferred from electronic annotation
1554018_at	BC011595	glycoprotein (transmembrane) nmb	GPNMB	10457	8285 // negative regulation of cell proliferation // traceable author statement
1554121_at	BC012536	hydroxysteroid (17-beta) dehydrogenase 12	HSD17B12	51144	8152 // metabolism // inferred from electronic annotation
1554127_s_at	BC040053	methionine sulfoxide reductase B3	MSRB3	253827	30091 // protein repair // inferred from direct assay
1554199_at	BC035960	protein tyrosine phosphatase, receptor type, O	PTPRO	5800	6470 // protein amino acid dephosphorylation // inferred from electronic annotation /// 6470 // protein amino acid dephosphorylation // traceable author statement
1554242_a_at	BC007230	coagulation factor C homolog, cochlin (Limulus polyphemus)	COCH	1690	7605 // sensory perception of sound // traceable author statement /// 7605 // sensory perception of sound // inferred from electronic annotation
1554272_at	BC017927	leukocyte-derived arginine aminopeptidase	LRAP	64167	6508 // proteolysis // inferred from electronic annotation /// 8217 // blood pressure regulation // traceable author statement /// 19885 // antigen processing, endogenous antigen via MHC class I // traceable author statement
1554298_a_at	BC035512	WD repeat domain 49	WDR49	151790	---
1554333_at	BC031044	DnaJ (Hsp40) homolog, subfamily A, member 4	DNAJA4	55466	6457 // protein folding // inferred from electronic annotation
1554340_a_at	BC021286	chromosome 1 open reading frame 187	C1orf187	374946	---
1554418_s_at	AB056866	sparc/osteonectin, cwcv and kazal-like domains proteoglycan (testican) 3	SPOCK3	50859	---
1554438_at	BC018764	KIAA1217	KIAA1217	56243	---
1554481_a_at	BC039079	erythrocyte membrane protein band 4.1 (elliptocytosis 1, RH-linked)	EPB41	2035	8015 // circulation // traceable author statement /// 30866 // cortical actin cytoskeleton organization and biogenesis // inferred from electronic annotation /// 30036 // actin cytoskeleton organization and biogenesis // non-traceable author statement
1554500_a_at	AF493931	regulator of G-protein signalling 7	RGS7	6000	7186 // G-protein coupled receptor protein signaling pathway // inferred from electronic annotation /// 7242 // intracellular signaling cascade // inferred from electronic annotation /// 8277 // regulation of G-protein coupled receptor protein signaling pathway // non-traceable author statement /// 9968 // negative regulation of signal transduction // inferred from electronic annotation
1554507_at	BC027594	N-acetylated alpha-linked acidic dipeptidase 2	NAALAD2	10003	6508 // proteolysis // inferred from electronic annotation /// 6508 // proteolysis // non-traceable author statement
1554508_at	BC029917	phosphoinositide-3-kinase adaptor protein 1	PIK3AP1	118788	---
1554524_a_at	AF397394	olfactomedin 3	OLFM3	118427	---
1554526_at	BC022531	olfactomedin 3	OLFM3	118427	---
1554528_at	AB063296	chromosome 3 open reading frame 15	C3orf15	89876	6597 // spermine biosynthesis // inferred from electronic annotation /// 8295 // spermidine biosynthesis // inferred from electronic annotation
1554536_at	BC008379	dihydropyrimidine dehydrogenase	DPYD	1806	6118 // electron transport // inferred from electronic annotation /// 6207 // 'de novo' pyrimidine base biosynthesis // inferred from electronic annotation /// 6212 // uracil catabolism // non-traceable author statement /// 6214 // thymidine catabolism // non-traceable author statement
1554544_a_at	L18865	myelin basic protein	MBP	4155	6955 // immune response // traceable author statement /// 7268 // synaptic transmission // traceable author statement /// 7417 // central nervous system development // traceable author statement /// 8366 // nerve ensheathment // traceable author statement
1554547_at	BC036453	family with sequence similarity 13, member C1	FAM13C1	220965	---
1554571_at	BC035636	amyloid beta (A4) precursor protein-binding, family B, member 1 interacting protein	APBB1IP	54518	7165 // signal transduction // inferred from electronic annotation
1554576_a_at	BC007242	ets variant gene 4 (E1A enhancer binding protein, E1AF)	ETV4	2118	6350 // transcription // inferred from electronic annotation /// 6355 // regulation of transcription, DNA-dependent // non-traceable author statement /// 6355 // regulation of transcription, DNA-dependent // inferred from electronic annotation
1554600_s_at	BC033088	lamin A/C	LMNA	4000	---
1554633_a_at	AF036943	myelin transcription factor 1-like	MYT1L	23040	6350 // transcription // inferred from electronic annotation /// 6355 // regulation of transcription, DNA-dependent // inferred from electronic annotation /// 7399 // nervous system development // inferred from electronic annotation /// 30154 // cell differentiation // inferred from electronic annotation /// 7275 // development // inferred from electronic annotation
1554636_at	BC032569	---	---		---
1554640_at	BC039306	paralemmin 2	PALM2	114299	8360 // regulation of cell shape // inferred from electronic annotation
1554706_at	BC028158	olfactory receptor, family 2, subfamily L, member 13	OR2L13	284521	7165 // signal transduction // inferred from electronic annotation /// 7186 // G-protein coupled receptor protein signaling pathway // inferred from electronic annotation /// 7608 // sensory perception of smell // inferred from electronic annotation /// 50896 // response to stimulus // inferred from electronic annotation
1554724_at	BC036083	solute carrier family 6 (neurotransmitter transporter, GABA), member 11	SLC6A11	6538	6836 // neurotransmitter transport // inferred from electronic annotation /// 6810 // transport // inferred from electronic annotation
1554834_a_at	AY062002	Ras association (RalGDS/AF-6) domain family 5	RASSF5	83593	6915 // apoptosis // inferred from electronic annotation /// 7049 // cell cycle // inferred from electronic annotation /// 7242 // intracellular signaling cascade // inferred from electronic annotation /// 45786 // negative regulation of progression through cell cycle // inferred from electronic annotation /// 7165 // signal transduction // inferred from electronic annotation
1554867_a_at	BC038838	proline rich 16	PRR16	51334	---
1554981_at	BC014307	chromosome 9 open reading frame 11	C9orf11	54586	---
1554997_a_at	AY151286	prostaglandin-endoperoxide synthase 2 (prostaglandin G/H synthase and cyclooxygenase)	PTGS2	5743	1516 // prostaglandin biosynthesis // inferred from electronic annotation /// 6633 // fatty acid biosynthesis // inferred from electronic annotation /// 6928 // cell motility // traceable author statement /// 7582 // physiological process // traceable author statement /// 8217 // blood pressure regulation // inferred from sequence or structural similarity /// 19371 // cyclooxygenase pathway // no…
1555102_at	BC010956	fibroblast growth factor 7 (keratinocyte growth factor)	FGF7	2252	74 // regulation of progression through cell cycle // inferred from electronic annotation /// 7165 // signal transduction // non-traceable author statement /// 7267 // cell-cell signaling // not recorded /// 8283 // cell proliferation // inferred from electronic annotation /// 8284 // positive regulation of cell proliferation // traceable author statement /// 8544 // epidermis development // trac…
1555103_s_at	BC010956	fibroblast growth factor 7 (keratinocyte growth factor)	FGF7	2252	74 // regulation of progression through cell cycle // inferred from electronic annotation /// 7165 // signal transduction // non-traceable author statement /// 7267 // cell-cell signaling // not recorded /// 8283 // cell proliferation // inferred from electronic annotation /// 8284 // positive regulation of cell proliferation // traceable author statement /// 8544 // epidermis development // trac…
1555111_at	BC026073	chromosome 1 open reading frame 114	C1orf114	57821	---
1555120_at	BC020749	CD96 molecule	CD96	10225	6955 // immune response // traceable author statement /// 7155 // cell adhesion // traceable author statement
1555216_a_at	BC009278	hypothetical protein LOC645722	LOC645722	645722	---
1555233_at	BC025770	ras homolog gene family, member J	RHOJ	57381	7264 // small GTPase mediated signal transduction // inferred from electronic annotation /// 8360 // regulation of cell shape // inferred from electronic annotation /// 30036 // actin cytoskeleton organization and biogenesis // inferred from mutant phenotype
1555253_at	BC036669	collagen, type XXV, alpha 1	COL25A1	84570	6817 // phosphate transport // inferred from electronic annotation
1555275_a_at	BC032348	kelch-like 6 (Drosophila)	KLHL6	89857	---
1555345_at	AF193836	solute carrier family 38, member 4	SLC38A4	55089	6412 // protein biosynthesis // inferred from electronic annotation /// 6810 // transport // inferred from electronic annotation /// 6811 // ion transport // inferred from electronic annotation /// 6814 // sodium ion transport // inferred from electronic annotation /// 6865 // amino acid transport // inferred from electronic annotation
1555349_a_at	L78790	integrin, beta 2 (complement component 3 receptor 3 and 4 subunit)	ITGB2	3689	6915 // apoptosis // non-traceable author statement /// 6954 // inflammatory response // non-traceable author statement /// 7155 // cell adhesion // inferred from electronic annotation /// 7155 // cell adhesion // traceable author statement /// 7159 // leukocyte adhesion // inferred from direct assay /// 7160 // cell-matrix adhesion // inferred from electronic annotation /// 7229 // integrin-medi…
1555375_at	BC037954	glutamate receptor, ionotropic, kainate 2	GRIK2	2898	6811 // ion transport // inferred from electronic annotation /// 7215 // glutamate signaling pathway // traceable author statement /// 7268 // synaptic transmission // traceable author statement /// 31557 // induction of programmed cell death in response to chemical stimulus // non-traceable author statement /// 48172 // regulation of short-term neuronal synaptic plasticity // inferred from mutan…
1555412_at	BC044938	F-box and leucine-rich repeat protein 21	FBXL21	26223	16567 // protein ubiquitination // non-traceable author statement /// 6512 // ubiquitin cycle // inferred from electronic annotation
1555471_a_at	BC014364	formin 2	FMN2	56776	7242 // intracellular signaling cascade // inferred from electronic annotation /// 7275 // development // non-traceable author statement /// 16043 // cell organization and biogenesis // inferred from electronic annotation /// 30036 // actin cytoskeleton organization and biogenesis // inferred from electronic annotation /// 7275 // development // inferred from electronic annotation
1555544_a_at	AF538973	immunoglobulin superfamily, member 4D	IGSF4D	253559	---
1555564_a_at	BC020718	complement factor I	CFI	3426	6508 // proteolysis // inferred from electronic annotation /// 6958 // complement activation, classical pathway // inferred from electronic annotation /// 45087 // innate immune response // inferred from electronic annotation /// 6955 // immune response // inferred from electronic annotation
1555578_at	BC029442	protein tyrosine phosphatase, receptor type, M	PTPRM	5797	6470 // protein amino acid dephosphorylation // traceable author statement /// 6470 // protein amino acid dephosphorylation // inferred from electronic annotation
1555579_s_at	BC029442	protein tyrosine phosphatase, receptor type, M	PTPRM	5797	6470 // protein amino acid dephosphorylation // traceable author statement /// 6470 // protein amino acid dephosphorylation // inferred from electronic annotation
1555600_s_at	AF305226	apolipoprotein L, 4	APOL4	80832	6869 // lipid transport // inferred from electronic annotation /// 42157 // lipoprotein metabolism // inferred from electronic annotation /// 6810 // transport // inferred from electronic annotation
1555719_a_at	AB063298	chromosome 3 open reading frame 15	C3orf15	89876	6597 // spermine biosynthesis // inferred from electronic annotation /// 8295 // spermidine biosynthesis // inferred from electronic annotation
1555724_s_at	BC010946	transgelin	TAGLN	6876	7517 // muscle development // inferred from electronic annotation /// 7517 // muscle development // traceable author statement
1555756_a_at	AF400600	C-type lectin domain family 7, member A	CLEC7A	64581	6910 // phagocytosis, recognition // inferred from direct assay /// 8037 // cell recognition // inferred from direct assay /// 9756 // carbohydrate mediated signaling // traceable author statement /// 42110 // T cell activation // traceable author statement /// 19733 // antibacterial humoral response (sensu Vertebrata) // non-traceable author statement /// 19734 // antifungal humoral response (se…
1555765_a_at	AF493872	guanine nucleotide binding protein (G protein), gamma 4	GNG4	2786	7165 // signal transduction // inferred from electronic annotation /// 8277 // regulation of G-protein coupled receptor protein signaling pathway // traceable author statement /// 7186 // G-protein coupled receptor protein signaling pathway // inferred from electronic annotation
1555798_at	AL831916	hypothetical protein DKFZp761D1918	DKFZp761D1918	400692	---
1555812_a_at	AF498927	Rho GDP dissociation inhibitor (GDI) beta	ARHGDIB	397	6928 // cell motility // traceable author statement /// 6955 // immune response // traceable author statement /// 7162 // negative regulation of cell adhesion // traceable author statement /// 7266 // Rho protein signal transduction // traceable author statement /// 7275 // development // traceable author statement /// 30036 // actin cytoskeleton organization and biogenesis // traceable author st…
1555852_at	AI375915	---	---		---
1555867_at	BM666010	hypothetical protein LOC200169	LOC200169	200169	---
1555890_at	BC040701	Olfactory receptor, family 2, subfamily A, member 7	OR2A7	401427	7165 // signal transduction // inferred from electronic annotation /// 7186 // G-protein coupled receptor protein signaling pathway // inferred from electronic annotation /// 7608 // sensory perception of smell // inferred from electronic annotation /// 50896 // response to stimulus // inferred from electronic annotation
1555907_at	BQ184856	CDNA clone IMAGE:6378521, **** WARNING: chimeric clone **** /// Centaurin, gamma 1	CENTG1	116986	7165 // signal transduction // inferred from sequence or structural similarity /// 7264 // small GTPase mediated signal transduction // inferred from electronic annotation /// 15031 // protein transport // inferred from electronic annotation /// 43087 // regulation of GTPase activity // inferred from electronic annotation /// 6810 // transport // inferred from electronic annotation
1555929_s_at	BM873997	Transcribed locus	---		---
1555935_s_at	T58129	hormonally upregulated Neu-associated kinase	HUNK	30811	6468 // protein amino acid phosphorylation // inferred from electronic annotation /// 7165 // signal transduction // traceable author statement /// 7275 // development // traceable author statement
1555997_s_at	BM128432	insulin-like growth factor binding protein 5	IGFBP5	3488	1558 // regulation of cell growth // inferred from electronic annotation /// 7165 // signal transduction // non-traceable author statement
1556034_s_at	AK097000	myotubularin related protein 11	MTMR11	10903	46839 // phospholipid dephosphorylation // inferred from electronic annotation
1556037_s_at	AK098525	hedgehog interacting protein	HHIP	64399	---
1556095_at	AL834407	unc-13 homolog C (C. elegans)	UNC13C	440279	6887 // exocytosis // inferred from electronic annotation /// 7242 // intracellular signaling cascade // inferred from electronic annotation
1556099_at	AF088005	Full length insert cDNA clone YY72H05	---		---
1556158_at	AL833762	hypothetical protein DKFZp666G057	DKFZp666G057	283726	---
1556159_at	AA496222	CDNA FLJ34358 fis, clone FEBRA2013905	---		---
1556261_a_at	AK097571	CDNA FLJ40252 fis, clone TESTI2024299	---		---
1556300_s_at	BF476109	MRNA; cDNA DKFZp564A232 (from clone DKFZp564A232)	---		---
1556331_a_at	BC035063	Phosphodiesterase 4D, cAMP-specific (phosphodiesterase E3 dunce homolog, Drosophila)	PDE4D	5144	7165 // signal transduction // inferred from electronic annotation
1556351_at	BM682352	Hyperpolarization activated cyclic nucleotide-gated potassium channel 1	HCN1	348980	6811 // ion transport // inferred from electronic annotation /// 6813 // potassium ion transport // non-traceable author statement /// 6814 // sodium ion transport // inferred from electronic annotation /// 6810 // transport // inferred from electronic annotation /// 6813 // potassium ion transport // inferred from electronic annotation
1556497_a_at	AW130612	Hypothetical gene supported by AK124699	FLJ42709	441094	---
1556499_s_at	BE221212	collagen, type I, alpha 1	COL1A1	1277	1501 // skeletal development // traceable author statement /// 6817 // phosphate transport // inferred from electronic annotation /// 7605 // sensory perception of sound // inferred from electronic annotation /// 8544 // epidermis development // traceable author statement
1556583_a_at	H23209	CDNA FLJ37694 fis, clone BRHIP2015224	---		---
1556598_at	AI698023	hypothetical LOC389105 /// hypothetical protein LOC651410	FLJ32997 /// LOC651410		---
1556601_a_at	R69077	Spermatogenesis associated 13	SPATA13	221178	35023 // regulation of Rho protein signal transduction // inferred from electronic annotation
1556629_a_at	AI806346	Synaptosomal-associated protein, 25kDa	SNAP25	6616	1504 // neurotransmitter uptake // non-traceable author statement /// 7268 // synaptic transmission // non-traceable author statement /// 7269 // neurotransmitter secretion // non-traceable author statement /// 16081 // synaptic vesicle docking during exocytosis // non-traceable author statement /// 50796 // regulation of insulin secretion // traceable author statement
1556643_at	AK055623	Hypothetical protein BC011840	LOC93343	93343	---
1556697_at	AI819722	G protein-regulated inducer of neurite outgrowth 3	GRIN3	285513	---
1556794_at	AI740788	---	---		---
1556815_at	BQ184537	H2A histone family, member Y2	H2AFY2	55506	6334 // nucleosome assembly // inferred from electronic annotation /// 7001 // chromosome organization and biogenesis (sensu Eukaryota) // inferred from electronic annotation /// 7549 // dosage compensation // inferred from direct assay /// 16568 // chromatin modification // inferred from electronic annotation
1556889_s_at	AI523241	CDNA FLJ37963 fis, clone CTONG2009689	---		---
1556927_at	U79244	Clone 23786 mRNA sequence	---		---
1557014_a_at	BC041970	chromosome 9 open reading frame 122	C9orf122	158228	---
1557051_s_at	CA448125	Homo sapiens, clone IMAGE:5019307, mRNA	---		---
1557078_at	AK054668	schlafen family member 5	SLFN5	162394	---
1557133_at	AV753446	hypothetical protein LOC286411	LOC286411	286411	---
1557155_a_at	AI367357	Zic family member 1 (odd-paired homolog, Drosophila)	ZIC1	7545	7389 // pattern specification // inferred from sequence or structural similarity /// 7399 // nervous system development // inferred from electronic annotation /// 7420 // brain development // inferred from direct assay /// 7610 // behavior // inferred from sequence or structural similarity /// 8589 // regulation of smoothened signaling pathway // inferred from sequence or structural similarity //…
1557167_at	AK024111	HLA complex group 11	HCG11	493812	---
1557180_at	AA633992	similar to expressed sequence AI593442	LOC399947	399947	---
1557236_at	BF512806	apolipoprotein L, 6	APOL6	80830	6869 // lipid transport // non-traceable author statement /// 42157 // lipoprotein metabolism // inferred from electronic annotation /// 6869 // lipid transport // inferred from electronic annotation /// 6810 // transport // inferred from electronic annotation
1557256_a_at	AA879409	CDNA FLJ37672 fis, clone BRHIP2012059	---		---
1557285_at	AI891075	Similar to Amphiregulin precursor (AR) (Colorectum cell-derived growth factor) (CRDGF)	LOC653193	653193	---
1557348_at	AI915861	CDNA clone IMAGE:4837650	---		---
1557534_at	BC035826	hypothetical protein LOC339862	LOC339862	339862	---
1557545_s_at	BF529886	ring finger protein 165	RNF165	494470	---
1557636_a_at	BC031107	hypothetical protein LOC136288	LOC136288	136288	---
1557642_at	AK090907	IQ motif containing with AAA domain	IQCA	79781	---
1557720_s_at	BC041343	myosin heavy chain Myr 8	RP11-54H7.1	23026	---
1557746_at	F10269	CDNA FLJ30709 fis, clone FCBBF2001243	---		---
1557765_at	BC039509	hypothetical protein LOC643401	LOC643401	643401	---
1557883_a_at	AI806183	CDNA FLJ30446 fis, clone BRACE2009255	---		---
1557905_s_at	AL552534	CD44 molecule (Indian blood group) /// mitogen-activated protein kinase 10	CD44 /// MAPK10		7155 // cell adhesion // inferred from electronic annotation /// 7160 // cell-matrix adhesion // non-traceable author statement /// 16337 // cell-cell adhesion // non-traceable author statement /// 6468 // protein amino acid phosphorylation // inferred from electronic annotation /// 7165 // signal transduction // traceable author statement /// 7254 // JNK cascade // inferred from sequence or stru…
1558101_at	BM546261	---	---		---
1558122_s_at	BI918028	MRNA; cDNA DKFZp564E143 (from clone DKFZp564E143)	---		---
1558170_at	BG746017	---	---		---
1558234_at	BU783259	hypothetical gene supported by AK093963	FLJ36644	400617	---
1558280_s_at	AK092668	Rho GTPase activating protein 29	ARHGAP29	9411	7242 // intracellular signaling cascade // inferred from electronic annotation /// 7266 // Rho protein signal transduction // traceable author statement /// 7165 // signal transduction // inferred from electronic annotation /// 46080 // dUTP metabolism // inferred from electronic annotation
1558387_at	R41806	Family with sequence similarity 77, member D	FAM77D	286183	---
1558411_at	BC011266	chromosome 3 open reading frame 50	C3orf50	93556	---
1558480_at	AL534992	MRNA; cDNA DKFZp666H219 (from clone DKFZp666H219)	---		---
1558668_s_at	AW072392	spermatogenesis associated 22	SPATA22	84690	---
1558725_at	BU579943	---	---		---
1558796_a_at	AL833240	MRNA; cDNA DKFZp761P2319 (from clone DKFZp761P2319)	---		---
1558957_s_at	BG539683	Transcribed locus	---		---
1558964_at	AA334950	FAT tumor suppressor homolog 3 (Drosophila)	FAT3	120114	7156 // homophilic cell adhesion // inferred from electronic annotation
1559051_s_at	AK097148	chromosome 6 open reading frame 150	C6orf150	115004	---
1559110_at	BC042916	Homo sapiens, clone IMAGE:5802033, mRNA	---		---
1559111_a_at	BC042916	Homo sapiens, clone IMAGE:5802033, mRNA	---		---
1559147_at	AK026981	CDNA: FLJ23328 fis, clone HEP12645	---		---
1559280_a_at	AA483467	CDNA FLJ35259 fis, clone PROST2004251	---		---
1559477_s_at	AL832770	Meis1, myeloid ecotropic viral integration site 1 homolog (mouse)	MEIS1	4211	6355 // regulation of transcription, DNA-dependent // inferred from electronic annotation /// 7275 // development // inferred from electronic annotation /// 6350 // transcription // inferred from electronic annotation /// 45449 // regulation of transcription // inferred from electronic annotation
1559504_at	BM759658	FLJ35409 protein	FLJ35409	400765	---
1559506_x_at	BM759658	FLJ35409 protein	FLJ35409	400765	---
1559584_a_at	BC025741	chromosome 16 open reading frame 54 /// similar to chromosome 16 open reading frame 54	C16orf54 /// LOC653141		---
1559612_at	AI086192	E74-like factor 2 (ets domain transcription factor)	ELF2	1998	6350 // transcription // inferred from electronic annotation /// 6357 // regulation of transcription from RNA polymerase II promoter // inferred from direct assay /// 6355 // regulation of transcription, DNA-dependent // inferred from electronic annotation
1559633_a_at	AK056349	cholinergic receptor, muscarinic 3	CHRM3	1131	6464 // protein modification // traceable author statement /// 7165 // signal transduction // inferred from electronic annotation /// 7165 // signal transduction // traceable author statement /// 7186 // G-protein coupled receptor protein signaling pathway // inferred from electronic annotation /// 7186 // G-protein coupled receptor protein signaling pathway // traceable author statement /// 7399…
1559827_at	BC039495	hypothetical LOC401074	LOC401074	401074	---
1559839_at	BC040697	T-box 18	TBX18	9096	6350 // transcription // inferred from electronic annotation /// 6355 // regulation of transcription, DNA-dependent // inferred from electronic annotation /// 6355 // regulation of transcription, DNA-dependent // non-traceable author statement /// 7275 // development // non-traceable author statement
1559949_at	T56980	Trichorhinophalangeal syndrome I	TRPS1	7227	1501 // skeletal development // traceable author statement /// 6350 // transcription // inferred from electronic annotation /// 6355 // regulation of transcription, DNA-dependent // inferred from electronic annotation /// 6366 // transcription from RNA polymerase II promoter // traceable author statement /// 6607 // NLS-bearing substrate import into nucleus // traceable author statement
1559965_at	BC037827	hypothetical protein LOC646345	LOC646345	646345	---
1559992_a_at	BC042069	CDNA clone IMAGE:5310959	---		---
1560018_at	H44077	cyclic AMP-regulated phosphoprotein, 21 kD	ARPP-21	10777	---
1560019_at	BI869014	Discs, large (Drosophila) homolog-associated protein 1	DLGAP1	9229	7267 // cell-cell signaling // inferred from electronic annotation /// 7268 // synaptic transmission // non-traceable author statement /// 7268 // synaptic transmission // traceable author statement
1560098_at	CA425039	Aldo-keto reductase family 1, member C2 (dihydrodiol dehydrogenase 2; bile acid binding protein; 3-alpha hydroxysteroid dehydrogenase, type III)	AKR1C2	1646	6629 // lipid metabolism // inferred from electronic annotation /// 6693 // prostaglandin metabolism // inferred from direct assay /// 7586 // digestion // inferred from direct assay /// 8202 // steroid metabolism // inferred from direct assay /// 8202 // steroid metabolism // inferred from electronic annotation
1560099_at	BC041488	Hypothetical protein LOC339260	LOC339260	339260	---
1560168_at	BC043538	hypothetical protein LOC646167	LOC646168	646168	---
1560358_at	BC038597	phosphorylase kinase, alpha 2 (liver)	PHKA2	5256	5975 // carbohydrate metabolism // traceable author statement /// 5977 // glycogen metabolism // inferred from electronic annotation /// 6091 // generation of precursor metabolites and energy // traceable author statement /// 6464 // protein modification // traceable author statement
1560372_at	AI800806	CDNA FLJ34680 fis, clone LIVER2003524	---		---
1560396_at	AK097976	kelch-like 6 (Drosophila)	KLHL6	89857	---
1560425_s_at	AV723260	Protein tyrosine phosphatase, receptor type, D	PTPRD	5789	6470 // protein amino acid dephosphorylation // traceable author statement /// 6796 // phosphate metabolism // non-traceable author statement /// 7185 // transmembrane receptor protein tyrosine phosphatase signaling pathway // traceable author statement /// 6470 // protein amino acid dephosphorylation // inferred from electronic annotation
1560676_at	BC041372	similar to seven in absentia 2	LOC283514	283514	6511 // ubiquitin-dependent protein catabolism // inferred from electronic annotation /// 7275 // development // inferred from electronic annotation
1560683_at	AL832227	MRNA; cDNA DKFZp686P1536 (from clone DKFZp686P1536)	---		---
1560746_at	AK075118	chromosome 1 open reading frame 118	C1orf118	374987	---
1560750_at	AK056598	hypothetical protein LOC151121	LOC151121	151121	---
1560813_at	BF692592	F-box and leucine-rich repeat protein 7	FBXL7	23194	6511 // ubiquitin-dependent protein catabolism // non-traceable author statement /// 6512 // ubiquitin cycle // inferred from electronic annotation
1560823_at	BC043561	hypothetical protein LOC340017	LOC340017	340017	---
1560851_at	BC017939	chromosome 10 open reading frame 136	C10orf136	414260	---
1560990_a_at	AF088020	Zinc finger protein 291	ZNF291	49855	---
1561067_at	H79538	Polybromo 1	PB1	55193	6350 // transcription // inferred from electronic annotation /// 6355 // regulation of transcription, DNA-dependent // inferred from electronic annotation /// 16568 // chromatin modification // inferred from electronic annotation
1561110_at	BC042825	CDNA clone IMAGE:5269446	---		---
1561177_at	AU148200	Zinc finger, RAN-binding domain containing 3	ZRANB3	84083	---
1561181_at	AI075770	AT rich interactive domain 5B (MRF1-like)	ARID5B	84159	6350 // transcription // inferred from electronic annotation /// 45892 // negative regulation of transcription, DNA-dependent // traceable author statement /// 6355 // regulation of transcription, DNA-dependent // inferred from electronic annotation
1561280_at	AK090497	hypothetical protein LOC284576	LOC284576	284576	---
1561331_at	BC040856	chromosome 1 open reading frame 99	C1orf99	339476	---
1561365_at	AA609131	Neuropilin 1	NRP1	8829	1525 // angiogenesis // inferred from electronic annotation /// 7155 // cell adhesion // inferred from electronic annotation /// 7165 // signal transduction // traceable author statement /// 7267 // cell-cell signaling // traceable author statement /// 7399 // nervous system development // inferred from electronic annotation /// 7411 // axon guidance // traceable author statement /// 8284 // posi…
1561511_at	BC036630	CDNA clone IMAGE:5294528	---		---
1561721_a_at	BC038754	chromosome 12 open reading frame 40	C12orf40	283461	---
1561765_at	AJ431619	MRNA adjacent to 3' end of integrated HPV16 (INT475)	---		---
1561775_at	U55186	---	---		---
1561985_at	AL832219	chromosome 14 open reading frame 39	C14orf39	317761	1747 // eye development (sensu Mammalia) // non-traceable author statement /// 7275 // development // inferred from electronic annotation /// 51090 // regulation of transcription factor activity // non-traceable author statement
1562019_at	AK092780	5'-nucleotidase domain containing 4	NT5DC4	284958	---
1562067_at	BC042865	CDNA clone IMAGE:5312957	---		---
1562071_at	BC036419	Transmembrane protein 16C	TMEM16C	63982	---
1562223_at	BC015119	hypothetical protein LOC644652	LOC644652	644652	---
1562226_at	AK075525	hypothetical protein FLJ14712	FLJ14712	221806	---
1562234_a_at	AF397731	neuron navigator 3 /// similar to neuron navigator 3	NAV3 /// LOC652725		---
1562235_s_at	AL832146	Pre-B-cell leukemia transcription factor 1	PBX1	5087	6355 // regulation of transcription, DNA-dependent // inferred from electronic annotation /// 6366 // transcription from RNA polymerase II promoter // not recorded /// 6700 // C21-steroid hormone biosynthesis // inferred from electronic annotation /// 7548 // sex differentiation // inferred from electronic annotation /// 9790 // embryonic development // inferred from sequence or structural simila…
1562245_a_at	AL833487	MRNA; cDNA DKFZp686H1629 (from clone DKFZp686H1629)	---		---
1562250_at	AF289567	Chromosome 9 open reading frame 164	C9orf164	349236	7275 // development // inferred from electronic annotation /// 7399 // nervous system development // inferred from electronic annotation /// 30154 // cell differentiation // inferred from electronic annotation /// 6916 // anti-apoptosis // traceable author statement /// 6955 // immune response // traceable author statement /// 7155 // cell adhesion // traceable author statement
1562309_s_at	AK092243	PHD finger protein 21B	PHF21B	112885	6355 // regulation of transcription, DNA-dependent // inferred from electronic annotation
1562316_at	AL833225	---	---		---
1562364_at	AL833700	---	---		---
1562484_at	BC041481	hypothetical protein FLJ35848	FLJ35848	284071	6810 // transport // inferred from electronic annotation
1562568_at	AK096066	hypothetical gene supported by AK096066	LOC400541	400541	---
1562608_at	BC037932	Transmembrane protein 144	TMEM144	55314	---
1562638_at	BC043572	hypothetical LOC339874	LOC339874	339874	---
1562696_at	BC043519	Homo sapiens, clone IMAGE:5166435, mRNA	---		---
1562992_at	BC036613	CDNA clone IMAGE:5277811	---		---
1562998_at	BC042957	CDNA clone IMAGE:5278322	---		---
1563022_at	BC017958	hypothetical gene supported by BC017958	LOC347475	347475	---
1563072_at	BC038562	Homo sapiens, clone IMAGE:3907519, mRNA	---		---
1563173_at	AL832272	MRNA; cDNA DKFZp667P1917 (from clone DKFZp667P1917)	---		---
1563209_a_at	BC035876	chromosome 20 open reading frame 133	C20orf133	140733	---
1563367_at	BG704389	Intramembrane protease 5	IMP5	162540	---
1563392_at	BM144812	V-ets erythroblastosis virus E26 oncogene like (avian)	ERG	2078	6350 // transcription // inferred from electronic annotation /// 6355 // regulation of transcription, DNA-dependent // inferred from electronic annotation /// 6468 // protein amino acid phosphorylation // traceable author statement /// 7165 // signal transduction // traceable author statement /// 7275 // development // traceable author statement /// 8283 // cell proliferation // traceable author …
1563546_at	AL833248	MRNA; cDNA DKFZp761F0120 (from clone DKFZp761F0120)	---		---
1563906_at	AK090879	hypothetical protein FLJ10159	FLJ10159	55084	---
1563933_a_at	AK091691	phospholipase D family, member 5	PLD5	200150	8152 // metabolism // inferred from electronic annotation
1564383_s_at	AK093253	FLJ35934 protein	FLJ35934	400579	---
1564767_at	AK024581	CDNA: FLJ20928 fis, clone ADSE01074	---		---
1565162_s_at	D16947	microsomal glutathione S-transferase 1	MGST1	4257	---
1565692_at	AI814750	Cerebellar degeneration-related protein 2, 62kDa	CDR2	1039	6445 // regulation of translation // non-traceable author statement
1565742_at	AI207496	Phosphonoformate immuno-associated protein 5	PFAAP5	10443	---
1565755_at	BF512803	methionine aminopeptidase 1D	MAP1D	254042	6508 // proteolysis // inferred from electronic annotation /// 18206 // peptidyl-methionine modification // traceable author statement /// 31365 // N-terminal protein amino acid modification // traceable author statement
1565936_a_at	T24091	LIM domain only 3 (rhombotin-like 2)	LMO3	55885	6350 // transcription // inferred from electronic annotation /// 6355 // regulation of transcription, DNA-dependent // inferred from electronic annotation
1566265_at	AF075080	Full length insert cDNA YQ80D07	---		---
1566362_at	AA585152	Deoxynucleotidyltransferase, terminal	DNTT	1791	6260 // DNA replication // inferred from electronic annotation /// 6304 // DNA modification // inferred from electronic annotation /// 19735 // antimicrobial humoral response (sensu Vertebrata) // traceable author statement /// 6259 // DNA metabolism // not recorded
1566428_at	AL833199	Paired box gene 5 (B-cell lineage specific activator)	PAX5	5079	6350 // transcription // inferred from electronic annotation /// 6355 // regulation of transcription, DNA-dependent // inferred from electronic annotation /// 6366 // transcription from RNA polymerase II promoter // traceable author statement /// 6959 // humoral immune response // traceable author statement /// 7275 // development // inferred from electronic annotation /// 7283 // spermatogenesis…
1566482_at	AL833114	Methionine sulfoxide reductase B3	MSRB3	253827	30091 // protein repair // inferred from direct assay
1566539_at	AL050129	Membrane associated guanylate kinase, WW and PDZ domain containing 1	MAGI1	9223	6461 // protein complex assembly // non-traceable author statement /// 7155 // cell adhesion // traceable author statement /// 7166 // cell surface receptor linked signal transduction // traceable author statement
1566637_at	AL831861	MRNA; cDNA DKFZp761H2217 (from clone DKFZp761H2217)	---		---
1566869_at	BC008613	Hypothetical protein LOC645380	LOC645380	645380	---
1566930_at	BC042010	transcription factor B2, mitochondrial	TFB2M	64216	154 // rRNA modification // inferred from electronic annotation
1566959_at	AL049273	GRB2-associated binding protein 2	GAB2	9846	---
1567359_at	AJ011597	Brain-derived neurotrophic factor	BDNF	627	7399 // nervous system development // traceable author statement
1567656_at	AJ459850	Olfactory receptor, family 2, subfamily H, member 1	OR2H1	26716	7165 // signal transduction // inferred from electronic annotation /// 7186 // G-protein coupled receptor protein signaling pathway // inferred from electronic annotation /// 7608 // sensory perception of smell // inferred from electronic annotation /// 50896 // response to stimulus // inferred from electronic annotation
1567702_at	U55185	---	---		---
1567861_at	U61741	dynein, axonemal, heavy polypeptide 14	DNAH14	1772	---
1568190_at	D16905	Glutamic-oxaloacetic transaminase 1, soluble (aspartate aminotransferase 1)	GOT1	2805	6520 // amino acid metabolism // inferred from electronic annotation /// 6533 // aspartate catabolism // traceable author statement /// 9058 // biosynthesis // inferred from electronic annotation
1568286_at	U29120	High mobility group AT-hook 2	HMGA2	8091	6325 // establishment and/or maintenance of chromatin architecture // traceable author statement /// 6350 // transcription // inferred from electronic annotation /// 6355 // regulation of transcription, DNA-dependent // inferred from electronic annotation /// 6355 // regulation of transcription, DNA-dependent // traceable author statement /// 7001 // chromosome organization and biogenesis (sensu …
1568366_at	AJ012497	Kinesin-associated protein 3	KIFAP3	22920	6461 // protein complex assembly // traceable author statement /// 7017 // microtubule-based process // inferred from sequence or structural similarity /// 7165 // signal transduction // traceable author statement
1568603_at	AI912173	Ca2+-dependent secretion activator	CADPS	8618	6887 // exocytosis // inferred from electronic annotation /// 15031 // protein transport // inferred from electronic annotation /// 6810 // transport // inferred from electronic annotation
1568604_a_at	AI912173	Ca2+-dependent secretion activator	CADPS	8618	6887 // exocytosis // inferred from electronic annotation /// 15031 // protein transport // inferred from electronic annotation /// 6810 // transport // inferred from electronic annotation
1568612_at	BC036030	gamma-aminobutyric acid (GABA) A receptor, gamma 2	GABRG2	2566	6811 // ion transport // inferred from electronic annotation /// 6821 // chloride transport // inferred from electronic annotation /// 7214 // gamma-aminobutyric acid signaling pathway // inferred from electronic annotation /// 7214 // gamma-aminobutyric acid signaling pathway // traceable author statement /// 6810 // transport // inferred from electronic annotation /// 6810 // transport // trace…
1568711_a_at	BC034620	CDNA clone IMAGE:4829846	---		---
1568751_at	BC036950	regulator of G-protein signalling 13	RGS13	6003	9968 // negative regulation of signal transduction // inferred from electronic annotation
1568752_s_at	BC036950	regulator of G-protein signalling 13	RGS13	6003	9968 // negative regulation of signal transduction // inferred from electronic annotation
1569054_at	BC022285	solute carrier family 1 (glial high affinity glutamate transporter), member 3	SLC1A3	6507	1504 // neurotransmitter uptake // traceable author statement /// 6810 // transport // inferred from electronic annotation /// 6835 // dicarboxylic acid transport // inferred from electronic annotation /// 7268 // synaptic transmission // traceable author statement /// 15813 // L-glutamate transport // traceable author statement
1569178_at	BC035610	Similar to glutamate receptor, ionotrophic, AMPA 4	LOC653366	653366	---
1569191_at	BC016785	similar to zinc finger protein 91	FLJ44894	664701	---
1569290_s_at	BC032004	glutamate receptor, ionotrophic, AMPA 3	GRIA3	2892	6811 // ion transport // inferred from electronic annotation /// 7215 // glutamate signaling pathway // traceable author statement /// 6810 // transport // inferred from electronic annotation /// 6810 // transport // traceable author statement
1569391_at	BC023578	tankyrase, TRF1-interacting ankyrin-related ADP-ribose polymerase	TNKS	8658	6471 // protein amino acid ADP-ribosylation // inferred from electronic annotation /// 7004 // telomere maintenance via telomerase // non-traceable author statement /// 723 // telomere maintenance // inferred from electronic annotation
1569433_at	BC020896	SAM domain containing 1	RP5-875H10.1	389432	---
1569459_a_at	BC035337	Zinc finger protein 451	ZNF451	26036	6350 // transcription // inferred from electronic annotation /// 6355 // regulation of transcription, DNA-dependent // inferred from electronic annotation /// 9401 // phosphoenolpyruvate-dependent sugar phosphotransferase system // inferred from electronic annotation
1569469_a_at	BC040321	LIM homeobox 8	LHX8	431707	6355 // regulation of transcription, DNA-dependent // inferred from electronic annotation /// 45449 // regulation of transcription // inferred from electronic annotation
1569476_at	BC033224	DKFZP434L187 protein	DKFZP434L187	26082	---
1569566_at	BC028196	TBC1 (tre-2/USP6, BUB2, cdc16) domain family, member 1	TBC1D1	23216	6259 // DNA metabolism // inferred from electronic annotation /// 51276 // chromosome organization and biogenesis // inferred from electronic annotation
1569599_at	BC020638	SAM domain, SH3 domain and nuclear localisation signals, 1	SAMSN1	64092	---
1569756_at	BC034605	CDNA clone IMAGE:4838146	---		---
1569810_at	BC038785	CDNA clone IMAGE:5271710	---		---
1569873_at	BC042900	Lipase-like, ab-hydrolase domain containing 1	LIPL1	142910	16042 // lipid catabolism // inferred from electronic annotation
1569886_a_at	BC040605	hypothetical protein FLJ90231	FLJ90231	112937	5975 // carbohydrate metabolism // inferred from electronic annotation
1569981_at	BC039406	CDNA clone IMAGE:5300951	---		---
1570261_at	BC021693	Methionine-tRNA synthetase 2 (mitochondrial)	MARS2	92935	6412 // protein biosynthesis // inferred from electronic annotation /// 6431 // methionyl-tRNA aminoacylation // inferred from direct assay /// 6418 // tRNA aminoacylation for protein translation // inferred from electronic annotation /// 6431 // methionyl-tRNA aminoacylation // inferred from electronic annotation
1570339_x_at	BC019875	D-2-hydroxyglutarate dehydrogenase	D2HGDH	257054	6118 // electron transport // inferred from electronic annotation /// 6644 // phospholipid metabolism // inferred from electronic annotation /// 16042 // lipid catabolism // inferred from electronic annotation
1570585_at	BC031223	hypothetical protein LOC196264	LOC196264	196264	---
200606_at	NM_004415	desmoplakin	DSP	1832	8544 // epidermis development // traceable author statement /// 18149 // peptide cross-linking // inferred from direct assay /// 30216 // keratinocyte differentiation // inferred from direct assay
200660_at	NM_005620	S100 calcium binding protein A11 (calgizzarin)	S100A11	6282	7165 // signal transduction // traceable author statement /// 8156 // negative regulation of DNA replication // traceable author statement /// 8285 // negative regulation of cell proliferation // traceable author statement
200665_s_at	NM_003118	secreted protein, acidic, cysteine-rich (osteonectin) /// secreted protein, acidic, cysteine-rich (osteonectin)	SPARC	6678	1503 // ossification // traceable author statement /// 7169 // transmembrane receptor protein tyrosine kinase signaling pathway // non-traceable author statement
200795_at	NM_004684	SPARC-like 1 (mast9, hevin)	SPARCL1	8404	---
200872_at	NM_002966	S100 calcium binding protein A10 (annexin II ligand, calpactin I, light polypeptide (p11))	S100A10	6281	---
200878_at	AF052094	endothelial PAS domain protein 1	EPAS1	2034	1525 // angiogenesis // inferred from electronic annotation /// 1666 // response to hypoxia // inferred from direct assay /// 6355 // regulation of transcription, DNA-dependent // inferred from electronic annotation /// 6366 // transcription from RNA polymerase II promoter // traceable author statement /// 7165 // signal transduction // traceable author statement /// 30154 // cell differentiation…
200951_s_at	AW026491	cyclin D2	CCND2	894	74 // regulation of progression through cell cycle // non-traceable author statement /// 7049 // cell cycle // inferred from electronic annotation /// 51301 // cell division // inferred from electronic annotation /// 74 // regulation of progression through cell cycle // inferred from electronic annotation
200952_s_at	AI635187	cyclin D2	CCND2	894	74 // regulation of progression through cell cycle // non-traceable author statement /// 7049 // cell cycle // inferred from electronic annotation /// 51301 // cell division // inferred from electronic annotation /// 74 // regulation of progression through cell cycle // inferred from electronic annotation
200953_s_at	NM_001759	cyclin D2	CCND2	894	74 // regulation of progression through cell cycle // non-traceable author statement /// 7049 // cell cycle // inferred from electronic annotation /// 51301 // cell division // inferred from electronic annotation /// 74 // regulation of progression through cell cycle // inferred from electronic annotation
201012_at	NM_000700	annexin A1	ANXA1	301	6629 // lipid metabolism // traceable author statement /// 6916 // anti-apoptosis // traceable author statement /// 6928 // cell motility // traceable author statement /// 6954 // inflammatory response // traceable author statement /// 7166 // cell surface receptor linked signal transduction // traceable author statement /// 18149 // peptide cross-linking // inferred from direct assay /// 30216 /…
201015_s_at	NM_021991	junction plakoglobin	JUP	3728	7155 // cell adhesion // non-traceable author statement /// 7155 // cell adhesion // inferred from electronic annotation
201028_s_at	U82164	CD99 molecule	CD99	4267	7155 // cell adhesion // inferred from electronic annotation
201058_s_at	NM_006097	myosin, light polypeptide 9, regulatory	MYL9	10398	6937 // regulation of muscle contraction // traceable author statement
201069_at	NM_004530	matrix metallopeptidase 2 (gelatinase A, 72kDa gelatinase, 72kDa type IV collagenase)	MMP2	4313	270 // peptidoglycan metabolism // inferred from electronic annotation /// 6508 // proteolysis // traceable author statement /// 30574 // collagen catabolism // inferred from electronic annotation /// 6508 // proteolysis // inferred from electronic annotation
201105_at	NM_002305	lectin, galactoside-binding, soluble, 1 (galectin 1)	LGALS1	3956	42981 // regulation of apoptosis // traceable author statement /// 43123 // positive regulation of I-kappaB kinase/NF-kappaB cascade // inferred from mutant phenotype /// 6915 // apoptosis // traceable author statement
201109_s_at	AV726673	thrombospondin 1	THBS1	7057	6928 // cell motility // not recorded /// 7155 // cell adhesion // inferred from electronic annotation /// 7275 // development // traceable author statement /// 7399 // nervous system development // not recorded /// 7596 // blood coagulation // not recorded
201110_s_at	NM_003246	thrombospondin 1	THBS1	7057	6928 // cell motility // not recorded /// 7155 // cell adhesion // inferred from electronic annotation /// 7275 // development // traceable author statement /// 7399 // nervous system development // not recorded /// 7596 // blood coagulation // not recorded
201116_s_at	AI922855	carboxypeptidase E	CPE	1363	6464 // protein modification // non-traceable author statement /// 6508 // proteolysis // inferred from electronic annotation /// 7218 // neuropeptide signaling pathway // non-traceable author statement /// 8152 // metabolism // traceable author statement
201117_s_at	NM_001873	carboxypeptidase E	CPE	1363	6464 // protein modification // non-traceable author statement /// 6508 // proteolysis // inferred from electronic annotation /// 7218 // neuropeptide signaling pathway // non-traceable author statement /// 8152 // metabolism // traceable author statement
201137_s_at	NM_002121	major histocompatibility complex, class II, DP beta 1	HLA-DPB1	3115	6955 // immune response // inferred from electronic annotation /// 9405 // pathogenesis // traceable author statement /// 9596 // detection of pest, pathogen or parasite // traceable author statement /// 19884 // antigen presentation, exogenous antigen // inferred from electronic annotation /// 19886 // antigen processing, exogenous antigen via MHC class II // inferred from electronic annotation
201141_at	NM_002510	glycoprotein (transmembrane) nmb	GPNMB	10457	8285 // negative regulation of cell proliferation // traceable author statement
201148_s_at	AW338933	TIMP metallopeptidase inhibitor 3 (Sorsby fundus dystrophy, pseudoinflammatory)	TIMP3	7078	7169 // transmembrane receptor protein tyrosine kinase signaling pathway // non-traceable author statement /// 7601 // visual perception // inferred from electronic annotation /// 8624 // induction of apoptosis by extracellular signals // non-traceable author statement /// 50896 // response to stimulus // inferred from electronic annotation
201150_s_at	NM_000362	TIMP metallopeptidase inhibitor 3 (Sorsby fundus dystrophy, pseudoinflammatory)	TIMP3	7078	7169 // transmembrane receptor protein tyrosine kinase signaling pathway // non-traceable author statement /// 7601 // visual perception // inferred from electronic annotation /// 8624 // induction of apoptosis by extracellular signals // non-traceable author statement /// 50896 // response to stimulus // inferred from electronic annotation
201162_at	NM_001553	insulin-like growth factor binding protein 7	IGFBP7	3490	1558 // regulation of cell growth // inferred from electronic annotation /// 8285 // negative regulation of cell proliferation // traceable author statement
201163_s_at	NM_001553	insulin-like growth factor binding protein 7	IGFBP7	3490	1558 // regulation of cell growth // inferred from electronic annotation /// 8285 // negative regulation of cell proliferation // traceable author statement
201185_at	NM_002775	HtrA serine peptidase 1	HTRA1	5654	1558 // regulation of cell growth // inferred from electronic annotation /// 6508 // proteolysis // inferred from electronic annotation
201188_s_at	D26351	inositol 1,4,5-triphosphate receptor, type 3	ITPR3	3710	6811 // ion transport // inferred from electronic annotation /// 6816 // calcium ion transport // inferred from electronic annotation /// 7165 // signal transduction // traceable author statement /// 6810 // transport // inferred from electronic annotation /// 6810 // transport // traceable author statement
201189_s_at	NM_002224	inositol 1,4,5-triphosphate receptor, type 3	ITPR3	3710	6811 // ion transport // inferred from electronic annotation /// 6816 // calcium ion transport // inferred from electronic annotation /// 7165 // signal transduction // traceable author statement /// 6810 // transport // inferred from electronic annotation /// 6810 // transport // traceable author statement
201215_at	NM_005032	plastin 3 (T isoform)	PLS3	5358	---
201242_s_at	BC000006	ATPase, Na+/K+ transporting, beta 1 polypeptide	ATP1B1	481	6811 // ion transport // inferred from electronic annotation /// 6813 // potassium ion transport // inferred from electronic annotation /// 6814 // sodium ion transport // inferred from electronic annotation /// 6810 // transport // inferred from electronic annotation /// 6810 // transport // traceable author statement
201243_s_at	NM_001677	ATPase, Na+/K+ transporting, beta 1 polypeptide	ATP1B1	481	6811 // ion transport // inferred from electronic annotation /// 6813 // potassium ion transport // inferred from electronic annotation /// 6814 // sodium ion transport // inferred from electronic annotation /// 6810 // transport // inferred from electronic annotation /// 6810 // transport // traceable author statement
201278_at	N21202	Disabled homolog 2, mitogen-responsive phosphoprotein (Drosophila)	DAB2	1601	8283 // cell proliferation // traceable author statement /// 6955 // immune response // inferred from electronic annotation /// 6957 // complement activation, alternative pathway // inferred from electronic annotation /// 6958 // complement activation, classical pathway // inferred from electronic annotation /// 19835 // cytolysis // inferred from electronic annotation /// 45087 // innate immune …
201279_s_at	BC003064	disabled homolog 2, mitogen-responsive phosphoprotein (Drosophila)	DAB2	1601	8283 // cell proliferation // traceable author statement /// 6955 // immune response // inferred from electronic annotation /// 6957 // complement activation, alternative pathway // inferred from electronic annotation /// 6958 // complement activation, classical pathway // inferred from electronic annotation /// 19835 // cytolysis // inferred from electronic annotation /// 45087 // innate immune …
201280_s_at	NM_001343	disabled homolog 2, mitogen-responsive phosphoprotein (Drosophila)	DAB2	1601	8283 // cell proliferation // traceable author statement /// 6955 // immune response // inferred from electronic annotation /// 6957 // complement activation, alternative pathway // inferred from electronic annotation /// 6958 // complement activation, classical pathway // inferred from electronic annotation /// 19835 // cytolysis // inferred from electronic annotation /// 45087 // innate immune …
201288_at	NM_001175	Rho GDP dissociation inhibitor (GDI) beta	ARHGDIB	397	6928 // cell motility // traceable author statement /// 6955 // immune response // traceable author statement /// 7162 // negative regulation of cell adhesion // traceable author statement /// 7266 // Rho protein signal transduction // traceable author statement /// 7275 // development // traceable author statement /// 30036 // actin cytoskeleton organization and biogenesis // traceable author st…
201289_at	NM_001554	cysteine-rich, angiogenic inducer, 61	CYR61	3491	1558 // regulation of cell growth // inferred from electronic annotation /// 6935 // chemotaxis // inferred from electronic annotation /// 7155 // cell adhesion // inferred from electronic annotation /// 8283 // cell proliferation // traceable author statement /// 9653 // morphogenesis // traceable author statement
201315_x_at	NM_006435	interferon induced transmembrane protein 2 (1-8D)	IFITM2	10581	6955 // immune response // traceable author statement /// 9607 // response to biotic stimulus // inferred from electronic annotation /// 6955 // immune response // inferred from electronic annotation
201324_at	NM_001423	epithelial membrane protein 1	EMP1	2012	7275 // development // traceable author statement /// 8219 // cell death // not recorded /// 8283 // cell proliferation // traceable author statement /// 8544 // epidermis development // traceable author statement /// 16049 // cell growth // inferred from electronic annotation
201325_s_at	NM_001423	epithelial membrane protein 1	EMP1	2012	7275 // development // traceable author statement /// 8219 // cell death // not recorded /// 8283 // cell proliferation // traceable author statement /// 8544 // epidermis development // traceable author statement /// 16049 // cell growth // inferred from electronic annotation
201328_at	AL575509	v-ets erythroblastosis virus E26 oncogene homolog 2 (avian)	ETS2	2114	1501 // skeletal development // traceable author statement /// 6355 // regulation of transcription, DNA-dependent // inferred from electronic annotation
201340_s_at	AF010314	ectodermal-neural cortex (with BTB-like domain)	ENC1	8507	7275 // development // traceable author statement /// 7399 // nervous system development // traceable author statement /// 7275 // development // inferred from electronic annotation
201387_s_at	NM_004181	ubiquitin carboxyl-terminal esterase L1 (ubiquitin thiolesterase)	UCHL1	7345	6511 // ubiquitin-dependent protein catabolism // inferred from electronic annotation /// 16579 // protein deubiquitination // inferred from direct assay /// 6512 // ubiquitin cycle // inferred from electronic annotation /// 6511 // ubiquitin-dependent protein catabolism // not recorded
201427_s_at	NM_005410	selenoprotein P, plasma, 1	SEPP1	6414	6979 // response to oxidative stress // traceable author statement
201430_s_at	W72516	dihydropyrimidinase-like 3	DPYSL3	1809	6139 // nucleobase, nucleoside, nucleotide and nucleic acid metabolism // traceable author statement /// 7165 // signal transduction // traceable author statement /// 7399 // nervous system development // traceable author statement
201431_s_at	NM_001387	dihydropyrimidinase-like 3	DPYSL3	1809	6139 // nucleobase, nucleoside, nucleotide and nucleic acid metabolism // traceable author statement /// 7165 // signal transduction // traceable author statement /// 7399 // nervous system development // traceable author statement
201438_at	NM_004369	collagen, type VI, alpha 3	COL6A3	1293	6817 // phosphate transport // inferred from electronic annotation /// 7155 // cell adhesion // inferred from electronic annotation /// 7517 // muscle development // traceable author statement
201467_s_at	AI039874	NAD(P)H dehydrogenase, quinone 1	NQO1	1728	6118 // electron transport // inferred from electronic annotation /// 6805 // xenobiotic metabolism // traceable author statement /// 6809 // nitric oxide biosynthesis // traceable author statement /// 7271 // synaptic transmission, cholinergic // traceable author statement /// 9636 // response to toxin // traceable author statement
201506_at	NM_000358	transforming growth factor, beta-induced, 68kDa	TGFBI	7045	7155 // cell adhesion // inferred from electronic annotation /// 7162 // negative regulation of cell adhesion // traceable author statement /// 7601 // visual perception // traceable author statement /// 8283 // cell proliferation // traceable author statement /// 50896 // response to stimulus // inferred from electronic annotation /// 7601 // visual perception // inferred from electronic annotat…
201508_at	NM_001552	insulin-like growth factor binding protein 4	IGFBP4	3487	1501 // skeletal development // traceable author statement /// 1558 // regulation of cell growth // inferred from electronic annotation /// 6259 // DNA metabolism // traceable author statement /// 7165 // signal transduction // traceable author statement /// 8283 // cell proliferation // traceable author statement
201578_at	NM_005397	podocalyxin-like	PODXL	5420	---
201596_x_at	NM_000224	keratin 18	KRT18	3875	9653 // morphogenesis // traceable author statement /// 6412 // protein biosynthesis // inferred from electronic annotation
201601_x_at	NM_003641	interferon induced transmembrane protein 1 (9-27)	IFITM1	8519	74 // regulation of progression through cell cycle // traceable author statement /// 6955 // immune response // inferred from electronic annotation /// 7166 // cell surface receptor linked signal transduction // traceable author statement /// 8285 // negative regulation of cell proliferation // traceable author statement /// 9607 // response to biotic stimulus // inferred from electronic annotati…
201641_at	NM_004335	bone marrow stromal cell antigen 2	BST2	684	6959 // humoral immune response // traceable author statement /// 7267 // cell-cell signaling // traceable author statement /// 7275 // development // traceable author statement /// 8283 // cell proliferation // traceable author statement /// 43123 // positive regulation of I-kappaB kinase/NF-kappaB cascade // inferred from mutant phenotype
201645_at	NM_002160	tenascin C (hexabrachion)	TNC	3371	7155 // cell adhesion // traceable author statement /// 7155 // cell adhesion // inferred from electronic annotation
201655_s_at	M85289	heparan sulfate proteoglycan 2 (perlecan)	HSPG2	3339	7155 // cell adhesion // inferred from electronic annotation /// 6468 // protein amino acid phosphorylation // inferred from electronic annotation
201667_at	NM_000165	gap junction protein, alpha 1, 43kDa (connexin 43)	GJA1	2697	6810 // transport // traceable author statement /// 6936 // muscle contraction // traceable author statement /// 7267 // cell-cell signaling // traceable author statement /// 7507 // heart development // traceable author statement /// 7605 // sensory perception of sound // inferred from electronic annotation /// 16264 // gap junction assembly // traceable author statement /// 43123 // positive re…
201720_s_at	AI589086	lysosomal associated multispanning membrane protein 5	LAPTM5	7805	---
201744_s_at	NM_002345	lumican	LUM	4060	7601 // visual perception // traceable author statement /// 30199 // collagen fibril organization // non-traceable author statement
201798_s_at	NM_013451	fer-1-like 3, myoferlin (C. elegans)	FER1L3	26509	6936 // muscle contraction // traceable author statement /// 8015 // circulation // traceable author statement
201809_s_at	NM_000118	endoglin (Osler-Rendu-Weber syndrome 1)	ENG	2022	6810 // transport // inferred from electronic annotation /// 7155 // cell adhesion // inferred from electronic annotation /// 8015 // circulation // traceable author statement /// 9887 // organ morphogenesis // traceable author statement
201842_s_at	AI826799	EGF-containing fibulin-like extracellular matrix protein 1	EFEMP1	2202	7601 // visual perception // traceable author statement
201843_s_at	NM_004105	EGF-containing fibulin-like extracellular matrix protein 1	EFEMP1	2202	7601 // visual perception // traceable author statement
201850_at	NM_001747	capping protein (actin filament), gelsolin-like	CAPG	822	6461 // protein complex assembly // non-traceable author statement /// 9613 // response to pest, pathogen or parasite // traceable author statement /// 51016 // barbed-end actin filament capping // traceable author statement /// 51016 // barbed-end actin filament capping // inferred from electronic annotation
201852_x_at	AI813758	collagen, type III, alpha 1 (Ehlers-Danlos syndrome type IV, autosomal dominant)	COL3A1	1281	6817 // phosphate transport // inferred from electronic annotation /// 8015 // circulation // traceable author statement /// 9887 // organ morphogenesis // not recorded
201858_s_at	J03223	proteoglycan 1, secretory granule	PRG1	5552	---
201859_at	NM_002727	proteoglycan 1, secretory granule	PRG1	5552	---
201860_s_at	NM_000930	plasminogen activator, tissue	PLAT	5327	6464 // protein modification // traceable author statement /// 6508 // proteolysis // inferred from electronic annotation /// 6508 // proteolysis // traceable author statement /// 7596 // blood coagulation // traceable author statement
201888_s_at	U81379	interleukin 13 receptor, alpha 1	IL13RA1	3597	7166 // cell surface receptor linked signal transduction // traceable author statement
201893_x_at	AF138300	decorin	DCN	1634	9887 // organ morphogenesis // traceable author statement
201909_at	NM_001008	ribosomal protein S4, Y-linked 1	RPS4Y1	6192	6412 // protein biosynthesis // traceable author statement /// 6412 // protein biosynthesis // inferred from electronic annotation
201939_at	NM_006622	polo-like kinase 2 (Drosophila)	PLK2	10769	6468 // protein amino acid phosphorylation // inferred from electronic annotation /// 43123 // positive regulation of I-kappaB kinase/NF-kappaB cascade // inferred from mutant phenotype
201976_s_at	NM_012334	myosin X	MYO10	4651	7165 // signal transduction // inferred from electronic annotation /// 7155 // cell adhesion // inferred from electronic annotation
201983_s_at	AW157070	epidermal growth factor receptor (erythroblastic leukemia viral (v-erb-b) oncogene homolog, avian)	EGFR	1956	1503 // ossification // non-traceable author statement /// 6468 // protein amino acid phosphorylation // inferred from electronic annotation /// 6950 // response to stress // non-traceable author statement /// 7049 // cell cycle // inferred from electronic annotation /// 7166 // cell surface receptor linked signal transduction // inferred from direct assay /// 7173 // epidermal growth factor rece…
202007_at	BF940043	nidogen 1	NID1	4811	7155 // cell adhesion // inferred from electronic annotation /// 7160 // cell-matrix adhesion // inferred from electronic annotation
202016_at	NM_002402	mesoderm specific transcript homolog (mouse)	MEST	4232	7498 // mesoderm development // traceable author statement
202036_s_at	AF017987	secreted frizzled-related protein 1	SFRP1	6422	16055 // Wnt receptor signaling pathway // inferred from electronic annotation /// 30154 // cell differentiation // inferred from electronic annotation /// 7275 // development // inferred from electronic annotation
202037_s_at	NM_003012	secreted frizzled-related protein 1	SFRP1	6422	16055 // Wnt receptor signaling pathway // inferred from electronic annotation /// 30154 // cell differentiation // inferred from electronic annotation /// 7275 // development // inferred from electronic annotation
202052_s_at	NM_015577	retinoic acid induced 14	RAI14	26064	---
202086_at	NM_002462	myxovirus (influenza virus) resistance 1, interferon-inducible protein p78 (mouse) /// myxovirus (influenza virus) resistance 1, interferon-inducible protein p78 (mouse)	MX1	4599	6917 // induction of apoptosis // traceable author statement /// 6955 // immune response // inferred from electronic annotation /// 7165 // signal transduction // traceable author statement /// 9615 // response to virus // inferred from electronic annotation /// 6952 // defense response // traceable author statement
202132_at	AA081084	WW domain containing transcription regulator 1	WWTR1	25937	6350 // transcription // inferred from electronic annotation /// 6355 // regulation of transcription, DNA-dependent // non-traceable author statement /// 6355 // regulation of transcription, DNA-dependent // inferred from electronic annotation
202133_at	BF674349	WW domain containing transcription regulator 1	WWTR1	25937	6350 // transcription // inferred from electronic annotation /// 6355 // regulation of transcription, DNA-dependent // non-traceable author statement /// 6355 // regulation of transcription, DNA-dependent // inferred from electronic annotation
202149_at	AL136139	neural precursor cell expressed, developmentally down-regulated 9	NEDD9	4739	74 // regulation of progression through cell cycle // traceable author statement /// 1558 // regulation of cell growth // inferred from electronic annotation /// 7010 // cytoskeleton organization and biogenesis // non-traceable author statement /// 7049 // cell cycle // inferred from electronic annotation /// 7067 // mitosis // inferred from electronic annotation /// 7155 // cell adhesion // non-…
202156_s_at	N36839	CUG triplet repeat, RNA binding protein 2	CUGBP2	10659	6396 // RNA processing // traceable author statement /// 8016 // regulation of heart contraction // traceable author statement /// 7528 // neuromuscular junction development // not recorded
202157_s_at	U69546	CUG triplet repeat, RNA binding protein 2	CUGBP2	10659	6396 // RNA processing // traceable author statement /// 8016 // regulation of heart contraction // traceable author statement /// 7528 // neuromuscular junction development // not recorded
202196_s_at	NM_013253	dickkopf homolog 3 (Xenopus laevis)	DKK3	27122	6118 // electron transport // inferred from electronic annotation /// 7275 // development // inferred from electronic annotation /// 9653 // morphogenesis // traceable author statement /// 16055 // Wnt receptor signaling pathway // inferred from electronic annotation /// 30178 // negative regulation of Wnt receptor signaling pathway // inferred from electronic annotation
202202_s_at	NM_002290	laminin, alpha 4	LAMA4	3910	30155 // regulation of cell adhesion // inferred from electronic annotation /// 30334 // regulation of cell migration // inferred from electronic annotation /// 45995 // regulation of embryonic development // inferred from electronic annotation /// 7155 // cell adhesion // inferred from electronic annotation
202207_at	BG435404	ADP-ribosylation factor-like 4C	ARL4C	10123	6364 // rRNA processing // inferred from electronic annotation /// 7264 // small GTPase mediated signal transduction // inferred from electronic annotation /// 7046 // ribosome biogenesis // inferred from electronic annotation
202242_at	NM_004615	tetraspanin 7	TSPAN7	7102	6487 // protein amino acid N-linked glycosylation // traceable author statement
202269_x_at	BC002666	guanylate binding protein 1, interferon-inducible, 67kDa /// guanylate binding protein 1, interferon-inducible, 67kDa	GBP1	2633	6955 // immune response // inferred from electronic annotation
202270_at	NM_002053	guanylate binding protein 1, interferon-inducible, 67kDa /// guanylate binding protein 1, interferon-inducible, 67kDa	GBP1	2633	6955 // immune response // inferred from electronic annotation
202283_at	NM_002615	serpin peptidase inhibitor, clade F (alpha-2 antiplasmin, pigment epithelium derived factor), member 1	SERPINF1	5176	7275 // development // traceable author statement /// 8283 // cell proliferation // traceable author statement /// 16525 // negative regulation of angiogenesis // inferred from direct assay /// 50769 // positive regulation of neurogenesis // inferred from direct assay
202289_s_at	NM_006997	transforming, acidic coiled-coil containing protein 2	TACC2	10579	---
202291_s_at	NM_000900	matrix Gla protein	MGP	4256	1502 // cartilage condensation // traceable author statement /// 1503 // ossification // traceable author statement /// 7605 // sensory perception of sound // inferred from electronic annotation /// 30154 // cell differentiation // inferred from electronic annotation /// 30500 // regulation of bone mineralization // inferred from electronic annotation /// 1503 // ossification // inferred from ele…
202310_s_at	K01228	collagen, type I, alpha 1	COL1A1	1277	1501 // skeletal development // traceable author statement /// 6817 // phosphate transport // inferred from electronic annotation /// 7605 // sensory perception of sound // inferred from electronic annotation /// 8544 // epidermis development // traceable author statement
202350_s_at	NM_002380	matrilin 2	MATN2	4147	30198 // extracellular matrix organization and biogenesis // inferred from electronic annotation
202363_at	AF231124	sparc/osteonectin, cwcv and kazal-like domains proteoglycan (testican) 1	SPOCK1	6695	6928 // cell motility // traceable author statement /// 7155 // cell adhesion // traceable author statement /// 7275 // development // traceable author statement /// 7399 // nervous system development // traceable author statement /// 8283 // cell proliferation // traceable author statement
202391_at	NM_006317	brain abundant, membrane attached signal protein 1	BASP1	10409	---
202403_s_at	AA788711	collagen, type I, alpha 2	COL1A2	1278	1501 // skeletal development // traceable author statement /// 6817 // phosphate transport // inferred from electronic annotation /// 7169 // transmembrane receptor protein tyrosine kinase signaling pathway // non-traceable author statement /// 7605 // sensory perception of sound // inferred from electronic annotation
202404_s_at	NM_000089	collagen, type I, alpha 2	COL1A2	1278	1501 // skeletal development // traceable author statement /// 6817 // phosphate transport // inferred from electronic annotation /// 7169 // transmembrane receptor protein tyrosine kinase signaling pathway // non-traceable author statement /// 7605 // sensory perception of sound // inferred from electronic annotation
202409_at	X07868	insulin-like growth factor 2 (somatomedin A) /// insulin- insulin-like growth factor 2	IGF2 /// INS-IGF2		74 // regulation of progression through cell cycle // inferred from electronic annotation /// 1501 // skeletal development // traceable author statement /// 6349 // imprinting // traceable author statement /// 7275 // development // traceable author statement /// 7582 // physiological process // inferred from electronic annotation /// 8283 // cell proliferation // inferred from electronic annotat…
202410_x_at	NM_000612	insulin-like growth factor 2 (somatomedin A) /// insulin- insulin-like growth factor 2	IGF2 /// INS-IGF2		74 // regulation of progression through cell cycle // inferred from electronic annotation /// 1501 // skeletal development // traceable author statement /// 6349 // imprinting // traceable author statement /// 7275 // development // traceable author statement /// 7582 // physiological process // inferred from electronic annotation /// 8283 // cell proliferation // inferred from electronic annotat…
202436_s_at	AU144855	cytochrome P450, family 1, subfamily B, polypeptide 1	CYP1B1	1545	1747 // eye development (sensu Mammalia) // inferred from mutant phenotype /// 6118 // electron transport // inferred from electronic annotation /// 6118 // electron transport // traceable author statement /// 7601 // visual perception // traceable author statement
202437_s_at	NM_000104	cytochrome P450, family 1, subfamily B, polypeptide 1	CYP1B1	1545	1747 // eye development (sensu Mammalia) // inferred from mutant phenotype /// 6118 // electron transport // inferred from electronic annotation /// 6118 // electron transport // traceable author statement /// 7601 // visual perception // traceable author statement
202458_at	NM_007173	protease, serine, 23	PRSS23	11098	6508 // proteolysis // inferred from electronic annotation /// 7165 // signal transduction // inferred from electronic annotation /// 7186 // G-protein coupled receptor protein signaling pathway // inferred from electronic annotation /// 7608 // sensory perception of smell // inferred from electronic annotation /// 50896 // response to stimulus // inferred from electronic annotation
202465_at	NM_002593	procollagen C-endopeptidase enhancer	PCOLCE	5118	7275 // development // traceable author statement
202481_at	NM_004753	dehydrogenase/reductase (SDR family) member 3	DHRS3	9249	7601 // visual perception // traceable author statement /// 8152 // metabolism // inferred from electronic annotation /// 42572 // retinol metabolism // traceable author statement
202508_s_at	NM_003081	synaptosomal-associated protein, 25kDa	SNAP25	6616	1504 // neurotransmitter uptake // non-traceable author statement /// 7268 // synaptic transmission // non-traceable author statement /// 7269 // neurotransmitter secretion // non-traceable author statement /// 16081 // synaptic vesicle docking during exocytosis // non-traceable author statement /// 50796 // regulation of insulin secretion // traceable author statement
202517_at	NM_001313	collapsin response mediator protein 1	CRMP1	1400	6139 // nucleobase, nucleoside, nucleotide and nucleic acid metabolism // traceable author statement /// 7399 // nervous system development // traceable author statement
202546_at	NM_003761	vesicle-associated membrane protein 8 (endobrevin)	VAMP8	8673	6461 // protein complex assembly // not recorded /// 6904 // vesicle docking during exocytosis // not recorded /// 16192 // vesicle-mediated transport // inferred from electronic annotation
202598_at	NM_005979	S100 calcium binding protein A13	S100A13	6284	30154 // cell differentiation // non-traceable author statement
202609_at	NM_004447	epidermal growth factor receptor pathway substrate 8	EPS8	2059	7165 // signal transduction // traceable author statement /// 7173 // epidermal growth factor receptor signaling pathway // traceable author statement /// 8283 // cell proliferation // traceable author statement
202625_at	AI356412	v-yes-1 Yamaguchi sarcoma viral related oncogene homolog /// v-yes-1 Yamaguchi sarcoma viral related oncogene homolog	LYN	4067	6468 // protein amino acid phosphorylation // traceable author statement /// 7242 // intracellular signaling cascade // inferred from electronic annotation /// 8284 // positive regulation of cell proliferation // inferred from sequence or structural similarity /// 9725 // response to hormone stimulus // inferred from sequence or structural similarity /// 30218 // erythrocyte differentiation // in…
202626_s_at	NM_002350	v-yes-1 Yamaguchi sarcoma viral related oncogene homolog /// v-yes-1 Yamaguchi sarcoma viral related oncogene homolog	LYN	4067	6468 // protein amino acid phosphorylation // traceable author statement /// 7242 // intracellular signaling cascade // inferred from electronic annotation /// 8284 // positive regulation of cell proliferation // inferred from sequence or structural similarity /// 9725 // response to hormone stimulus // inferred from sequence or structural similarity /// 30218 // erythrocyte differentiation // in…
202627_s_at	AL574210	serpin peptidase inhibitor, clade E (nexin, plasminogen activator inhibitor type 1), member 1	SERPINE1	5054	7596 // blood coagulation // traceable author statement /// 42730 // fibrinolysis // traceable author statement
202628_s_at	NM_000602	serpin peptidase inhibitor, clade E (nexin, plasminogen activator inhibitor type 1), member 1	SERPINE1	5054	7596 // blood coagulation // traceable author statement /// 42730 // fibrinolysis // traceable author statement
202669_s_at	U16797	ephrin-B2	EFNB2	1948	7267 // cell-cell signaling // traceable author statement /// 7399 // nervous system development // inferred from electronic annotation /// 9653 // morphogenesis // traceable author statement /// 30154 // cell differentiation // inferred from electronic annotation /// 7275 // development // inferred from electronic annotation
202686_s_at	NM_021913	AXL receptor tyrosine kinase	AXL	558	74 // regulation of progression through cell cycle // traceable author statement /// 6468 // protein amino acid phosphorylation // inferred from electronic annotation /// 7165 // signal transduction // traceable author statement
202718_at	NM_000597	insulin-like growth factor binding protein 2, 36kDa	IGFBP2	3485	1558 // regulation of cell growth // inferred from electronic annotation
202719_s_at	BC001451	testis derived transcript (3 LIM domains)	TES	26136	---
202720_at	NM_015641	testis derived transcript (3 LIM domains)	TES	26136	---
202723_s_at	AW117498	forkhead box O1A (rhabdomyosarcoma)	FOXO1A	2308	6350 // transcription // inferred from electronic annotation /// 6355 // regulation of transcription, DNA-dependent // inferred from electronic annotation /// 6357 // regulation of transcription from RNA polymerase II promoter // traceable author statement /// 6916 // anti-apoptosis // traceable author statement
202724_s_at	NM_002015	forkhead box O1A (rhabdomyosarcoma)	FOXO1A	2308	6350 // transcription // inferred from electronic annotation /// 6355 // regulation of transcription, DNA-dependent // inferred from electronic annotation /// 6357 // regulation of transcription from RNA polymerase II promoter // traceable author statement /// 6916 // anti-apoptosis // traceable author statement
202728_s_at	AI986120	latent transforming growth factor beta binding protein 1	LTBP1	4052	---
202729_s_at	NM_000627	latent transforming growth factor beta binding protein 1	LTBP1	4052	---
202746_at	AL021786	integral membrane protein 2A	ITM2A	9452	---
202747_s_at	NM_004867	integral membrane protein 2A	ITM2A	9452	---
202756_s_at	NM_002081	glypican 1	GPC1	2817	---
202765_s_at	AI264196	fibrillin 1	FBN1	2200	1501 // skeletal development // inferred from mutant phenotype /// 7507 // heart development // inferred from mutant phenotype /// 7596 // blood coagulation // inferred from electronic annotation
202766_s_at	NM_000138	fibrillin 1	FBN1	2200	1501 // skeletal development // inferred from mutant phenotype /// 7507 // heart development // inferred from mutant phenotype /// 7596 // blood coagulation // inferred from electronic annotation
202800_at	NM_004172	solute carrier family 1 (glial high affinity glutamate transporter), member 3	SLC1A3	6507	1504 // neurotransmitter uptake // traceable author statement /// 6810 // transport // inferred from electronic annotation /// 6835 // dicarboxylic acid transport // inferred from electronic annotation /// 7268 // synaptic transmission // traceable author statement /// 15813 // L-glutamate transport // traceable author statement
202803_s_at	NM_000211	integrin, beta 2 (complement component 3 receptor 3 and 4 subunit)	ITGB2	3689	6915 // apoptosis // non-traceable author statement /// 6954 // inflammatory response // non-traceable author statement /// 7155 // cell adhesion // inferred from electronic annotation /// 7155 // cell adhesion // traceable author statement /// 7159 // leukocyte adhesion // inferred from direct assay /// 7160 // cell-matrix adhesion // inferred from electronic annotation /// 7229 // integrin-medi…
202820_at	NM_001621	aryl hydrocarbon receptor	AHR	196	6355 // regulation of transcription, DNA-dependent // inferred from direct assay /// 6366 // transcription from RNA polymerase II promoter // inferred from direct assay /// 6915 // apoptosis // traceable author statement /// 6950 // response to stress // inferred from direct assay /// 7049 // cell cycle // traceable author statement /// 7165 // signal transduction // inferred from electronic anno…
202827_s_at	AU149305	matrix metallopeptidase 14 (membrane-inserted)	MMP14	4323	270 // peptidoglycan metabolism // inferred from electronic annotation /// 6508 // proteolysis // traceable author statement /// 6508 // proteolysis // inferred from electronic annotation
202828_s_at	NM_004995	matrix metallopeptidase 14 (membrane-inserted)	MMP14	4323	270 // peptidoglycan metabolism // inferred from electronic annotation /// 6508 // proteolysis // traceable author statement /// 6508 // proteolysis // inferred from electronic annotation
202855_s_at	AL513917	solute carrier family 16, member 3 (monocarboxylic acid transporter 4)	SLC16A3	9123	6810 // transport // inferred from electronic annotation /// 15711 // organic anion transport // inferred from electronic annotation /// 15718 // monocarboxylic acid transport // traceable author statement
202863_at	NM_003113	SP100 nuclear antigen	SP100	6672	6355 // regulation of transcription, DNA-dependent // traceable author statement /// 6355 // regulation of transcription, DNA-dependent // inferred from electronic annotation
202864_s_at	NM_003113	SP100 nuclear antigen	SP100	6672	6355 // regulation of transcription, DNA-dependent // traceable author statement /// 6355 // regulation of transcription, DNA-dependent // inferred from electronic annotation
202890_at	AW242297	microtubule-associated protein 7	MAP7	9053	226 // microtubule cytoskeleton organization and biogenesis // traceable author statement /// 7163 // establishment and/or maintenance of cell polarity // traceable author statement
202897_at	AB023430	signal-regulatory protein alpha	SIRPA	140885	7155 // cell adhesion // traceable author statement
202898_at	NM_014654	syndecan 3 (N-syndecan)	SDC3	9672	---
202902_s_at	NM_004079	cathepsin S	CTSS	1520	6508 // proteolysis // traceable author statement /// 6955 // immune response // traceable author statement /// 6508 // proteolysis // inferred from electronic annotation
202910_s_at	NM_001784	CD97 molecule	CD97	976	6928 // cell motility // traceable author statement /// 6954 // inflammatory response // traceable author statement /// 7155 // cell adhesion // traceable author statement /// 7218 // neuropeptide signaling pathway // inferred from electronic annotation /// 7267 // cell-cell signaling // traceable author statement /// 7155 // cell adhesion // inferred from electronic annotation /// 7165 // signal…
202912_at	NM_001124	adrenomedullin	ADM	133	6171 // cAMP biosynthesis // traceable author statement /// 6701 // progesterone biosynthesis // traceable author statement /// 7165 // signal transduction // traceable author statement /// 7267 // cell-cell signaling // traceable author statement /// 7565 // pregnancy // traceable author statement /// 7588 // excretion // not recorded /// 8015 // circulation // traceable author statement /// 961…
202920_at	BF726212	ankyrin 2, neuronal	ANK2	287	7165 // signal transduction // inferred from electronic annotation
202935_s_at	AI382146	SRY (sex determining region Y)-box 9 (campomelic dysplasia, autosomal sex-reversal)	SOX9	6662	1501 // skeletal development // not recorded /// 1502 // cartilage condensation // not recorded /// 6350 // transcription // inferred from electronic annotation /// 6357 // regulation of transcription from RNA polymerase II promoter // traceable author statement /// 6355 // regulation of transcription, DNA-dependent // inferred from electronic annotation
202936_s_at	NM_000346	SRY (sex determining region Y)-box 9 (campomelic dysplasia, autosomal sex-reversal)	SOX9	6662	1501 // skeletal development // not recorded /// 1502 // cartilage condensation // not recorded /// 6350 // transcription // inferred from electronic annotation /// 6357 // regulation of transcription from RNA polymerase II promoter // traceable author statement /// 6355 // regulation of transcription, DNA-dependent // inferred from electronic annotation
202947_s_at	NM_002101	glycophorin C (Gerbich blood group)	GYPC	2995	6487 // protein amino acid N-linked glycosylation // traceable author statement /// 6493 // protein amino acid O-linked glycosylation // traceable author statement /// 9887 // organ morphogenesis // traceable author statement
202948_at	NM_000877	interleukin 1 receptor, type I	IL1R1	3554	6954 // inflammatory response // not recorded /// 7166 // cell surface receptor linked signal transduction // traceable author statement /// 6955 // immune response // traceable author statement
202952_s_at	NM_003474	ADAM metallopeptidase domain 12 (meltrin alpha)	ADAM12	8038	6508 // proteolysis // inferred from electronic annotation /// 7155 // cell adhesion // inferred from electronic annotation /// 7229 // integrin-mediated signaling pathway // inferred from electronic annotation /// 7520 // myoblast fusion // traceable author statement
202986_at	NM_014862	aryl-hydrocarbon receptor nuclear translocator 2	ARNT2	9915	1666 // response to hypoxia // inferred from direct assay /// 1701 // embryonic development (sensu Mammalia) // inferred from sequence or structural similarity /// 6355 // regulation of transcription, DNA-dependent // inferred from electronic annotation /// 7165 // signal transduction // inferred from electronic annotation /// 7165 // signal transduction // inferred from sequence or structural si…
202988_s_at	NM_002922	regulator of G-protein signalling 1	RGS1	5996	6955 // immune response // traceable author statement /// 7165 // signal transduction // non-traceable author statement /// 7193 // G-protein signaling, adenylate cyclase inhibiting pathway // traceable author statement /// 9968 // negative regulation of signal transduction // inferred from electronic annotation
202989_at	NM_002922	regulator of G-protein signalling 1	RGS1	5996	6955 // immune response // traceable author statement /// 7165 // signal transduction // non-traceable author statement /// 7193 // G-protein signaling, adenylate cyclase inhibiting pathway // traceable author statement /// 9968 // negative regulation of signal transduction // inferred from electronic annotation
202998_s_at	NM_002318	lysyl oxidase-like 2	LOXL2	4017	6464 // protein modification // traceable author statement /// 7155 // cell adhesion // traceable author statement /// 7568 // aging // traceable author statement
203000_at	BF967657	stathmin-like 2	STMN2	11075	7242 // intracellular signaling cascade // inferred from electronic annotation /// 30182 // neuron differentiation // non-traceable author statement
203001_s_at	NM_007029	stathmin-like 2	STMN2	11075	7242 // intracellular signaling cascade // inferred from electronic annotation /// 30182 // neuron differentiation // non-traceable author statement
203005_at	NM_002342	lymphotoxin beta receptor (TNFR superfamily, member 3)	LTBR	4055	6915 // apoptosis // inferred from electronic annotation /// 6955 // immune response // inferred from electronic annotation /// 7165 // signal transduction // traceable author statement /// 43123 // positive regulation of I-kappaB kinase/NF-kappaB cascade // inferred from expression pattern /// 7165 // signal transduction // inferred from electronic annotation
203028_s_at	NM_000101	cytochrome b-245, alpha polypeptide	CYBA	1535	6118 // electron transport // inferred from electronic annotation /// 6801 // superoxide metabolism // not recorded /// 6810 // transport // inferred from electronic annotation
203029_s_at	NM_002847	protein tyrosine phosphatase, receptor type, N polypeptide 2	PTPRN2	5799	6470 // protein amino acid dephosphorylation // inferred from electronic annotation /// 6470 // protein amino acid dephosphorylation // traceable author statement
203030_s_at	AF007555	protein tyrosine phosphatase, receptor type, N polypeptide 2	PTPRN2	5799	6470 // protein amino acid dephosphorylation // inferred from electronic annotation /// 6470 // protein amino acid dephosphorylation // traceable author statement
203037_s_at	NM_014751	metastasis suppressor 1	MTSS1	9788	6928 // cell motility // non-traceable author statement /// 7049 // cell cycle // inferred from electronic annotation /// 7155 // cell adhesion // non-traceable author statement /// 7169 // transmembrane receptor protein tyrosine kinase signaling pathway // traceable author statement /// 7399 // nervous system development // inferred from sequence or structural similarity /// 7517 // muscle devel…
203060_s_at	AF074331	3'-phosphoadenosine 5'-phosphosulfate synthase 2	PAPSS2	9060	103 // sulfate assimilation // inferred from electronic annotation /// 1501 // skeletal development // inferred from sequence or structural similarity /// 6139 // nucleobase, nucleoside, nucleotide and nucleic acid metabolism // not recorded /// 1501 // skeletal development // traceable author statement
203065_s_at	NM_001753	caveolin 1, caveolae protein, 22kDa	CAV1	857	30301 // cholesterol transport // traceable author statement /// 42632 // cholesterol homeostasis // traceable author statement
203066_at	NM_014863	B cell RAG associated protein	GALNAC4S-6ST	51363	---
203083_at	NM_003247	thrombospondin 2	THBS2	7058	7155 // cell adhesion // inferred from electronic annotation
203085_s_at	BC000125	transforming growth factor, beta 1 (Camurati-Engelmann disease)	TGFB1	7040	74 // regulation of progression through cell cycle // inferred from electronic annotation /// 1501 // skeletal development // inferred from sequence or structural similarity /// 6468 // protein amino acid phosphorylation // inferred from sequence or structural similarity /// 6954 // inflammatory response // inferred from sequence or structural similarity /// 7179 // transforming growth factor bet…
203088_at	NM_006329	fibulin 5	FBLN5	10516	7155 // cell adhesion // inferred from electronic annotation /// 7160 // cell-matrix adhesion // traceable author statement /// 7596 // blood coagulation // inferred from electronic annotation
203110_at	U43522	PTK2B protein tyrosine kinase 2 beta	PTK2B	2185	6461 // protein complex assembly // traceable author statement /// 6468 // protein amino acid phosphorylation // traceable author statement /// 6915 // apoptosis // traceable author statement /// 6950 // response to stress // traceable author statement /// 7155 // cell adhesion // not recorded /// 7165 // signal transduction // traceable author statement /// 7172 // signal complex formation // tr…
203129_s_at	BF059313	kinesin family member 5C	KIF5C	3800	6996 // organelle organization and biogenesis // traceable author statement /// 7018 // microtubule-based movement // inferred from electronic annotation
203130_s_at	NM_004522	kinesin family member 5C	KIF5C	3800	6996 // organelle organization and biogenesis // traceable author statement /// 7018 // microtubule-based movement // inferred from electronic annotation
203131_at	NM_006206	platelet-derived growth factor receptor, alpha polypeptide	PDGFRA	5156	6468 // protein amino acid phosphorylation // inferred from electronic annotation /// 7166 // cell surface receptor linked signal transduction // traceable author statement /// 7169 // transmembrane receptor protein tyrosine kinase signaling pathway // inferred from electronic annotation /// 8283 // cell proliferation // traceable author statement /// 6397 // mRNA processing // inferred from elec…
203153_at	NM_001548	interferon-induced protein with tetratricopeptide repeats 1 /// interferon-induced protein with tetratricopeptide repeats 1	IFIT1	3434	6955 // immune response // inferred from electronic annotation
203178_at	NM_001482	glycine amidinotransferase (L-arginine:glycine amidinotransferase)	GATM	2628	6601 // creatine biosynthesis // inferred from direct assay
203180_at	NM_000693	aldehyde dehydrogenase 1 family, member A3	ALDH1A3	220	6066 // alcohol metabolism // traceable author statement /// 6629 // lipid metabolism // traceable author statement /// 8152 // metabolism // inferred from electronic annotation
203184_at	NM_001999	fibrillin 2 (congenital contractural arachnodactyly)	FBN2	2201	9653 // morphogenesis // traceable author statement
203186_s_at	NM_002961	S100 calcium binding protein A4 (calcium protein, calvasculin, metastasin, murine placental homolog)	S100A4	6275	---
203215_s_at	AA877789	myosin VI	MYO6	4646	6941 // striated muscle contraction // non-traceable author statement /// 7605 // sensory perception of sound // traceable author statement /// 30048 // actin filament-based movement // non-traceable author statement /// 7605 // sensory perception of sound // inferred from electronic annotation
203233_at	NM_000418	interleukin 4 receptor	IL4R	3566	6955 // immune response // traceable author statement /// 7165 // signal transduction // traceable author statement /// 6955 // immune response // inferred from electronic annotation
203234_at	NM_003364	uridine phosphorylase 1	UPP1	7378	9116 // nucleoside metabolism // inferred from electronic annotation /// 9166 // nucleotide catabolism // inferred from electronic annotation /// 6139 // nucleobase, nucleoside, nucleotide and nucleic acid metabolism // traceable author statement
203238_s_at	NM_000435	Notch homolog 3 (Drosophila)	NOTCH3	4854	6350 // transcription // inferred from electronic annotation /// 6355 // regulation of transcription, DNA-dependent // inferred from electronic annotation /// 7219 // Notch signaling pathway // inferred from electronic annotation /// 9653 // morphogenesis // traceable author statement /// 30154 // cell differentiation // inferred from electronic annotation /// 50793 // regulation of development /…
203281_s_at	NM_003335	ubiquitin-activating enzyme E1-like	UBE1L	7318	6512 // ubiquitin cycle // inferred from electronic annotation /// 6464 // protein modification // inferred from electronic annotation /// 6464 // protein modification // non-traceable author statement
203304_at	NM_012342	BMP and activin membrane-bound inhibitor homolog (Xenopus laevis)	BAMBI	25805	---
203305_at	NM_000129	coagulation factor XIII, A1 polypeptide	F13A1	2162	7596 // blood coagulation // traceable author statement /// 18149 // peptide cross-linking // inferred from electronic annotation /// 7596 // blood coagulation // inferred from electronic annotation
203323_at	BF197655	caveolin 2	CAV2	858	---
203324_s_at	NM_001233	caveolin 2	CAV2	858	---
203325_s_at	AI130969	collagen, type V, alpha 1	COL5A1	1289	6817 // phosphate transport // inferred from electronic annotation /// 7155 // cell adhesion // inferred from electronic annotation
203331_s_at	U53470	inositol polyphosphate-5-phosphatase, 145kDa	INPP5D	3635	6796 // phosphate metabolism // traceable author statement /// 7242 // intracellular signaling cascade // inferred from electronic annotation /// 7165 // signal transduction // traceable author statement
203332_s_at	NM_005541	inositol polyphosphate-5-phosphatase, 145kDa	INPP5D	3635	6796 // phosphate metabolism // traceable author statement /// 7242 // intracellular signaling cascade // inferred from electronic annotation /// 7165 // signal transduction // traceable author statement
203382_s_at	NM_000041	apolipoprotein E	APOE	348	302 // response to reactive oxygen species // non-traceable author statement /// 6869 // lipid transport // traceable author statement /// 6917 // induction of apoptosis // inferred from direct assay /// 7010 // cytoskeleton organization and biogenesis // traceable author statement /// 7271 // synaptic transmission, cholinergic // traceable author statement /// 7611 // learning and/or memory // t…
203394_s_at	BE973687	hairy and enhancer of split 1, (Drosophila)	HES1	3280	6355 // regulation of transcription, DNA-dependent // inferred from electronic annotation /// 7399 // nervous system development // traceable author statement /// 6350 // transcription // inferred from electronic annotation /// 45449 // regulation of transcription // inferred from electronic annotation
203397_s_at	BF063271	UDP-N-acetyl-alpha-D-galactosamine:polypeptide N-acetylgalactosaminyltransferase 3 (GalNAc-T3)	GALNT3	2591	5975 // carbohydrate metabolism // non-traceable author statement
203407_at	NM_002705	periplakin	PPL	5493	31424 // keratinization // inferred from electronic annotation
203413_at	NM_006159	NEL-like 2 (chicken) /// NEL-like 2 (chicken)	NELL2	4753	7155 // cell adhesion // non-traceable author statement /// 7155 // cell adhesion // inferred from electronic annotation
203417_at	NM_017459	microfibrillar-associated protein 2	MFAP2	4237	---
203423_at	NM_002899	retinol binding protein 1, cellular	RBP1	5947	6776 // vitamin A metabolism // traceable author statement /// 6810 // transport // inferred from electronic annotation
203424_s_at	AW157548	insulin-like growth factor binding protein 5	IGFBP5	3488	1558 // regulation of cell growth // inferred from electronic annotation /// 7165 // signal transduction // non-traceable author statement
203434_s_at	AI433463	membrane metallo-endopeptidase (neutral endopeptidase, enkephalinase, CALLA, CD10)	MME	4311	6508 // proteolysis // traceable author statement /// 7267 // cell-cell signaling // traceable author statement /// 6508 // proteolysis // inferred from electronic annotation
203438_at	AI435828	stanniocalcin 2	STC2	8614	7166 // cell surface receptor linked signal transduction // traceable author statement /// 7267 // cell-cell signaling // traceable author statement /// 7584 // response to nutrient // traceable author statement
203440_at	M34064	cadherin 2, type 1, N-cadherin (neuronal)	CDH2	1000	7155 // cell adhesion // traceable author statement /// 7156 // homophilic cell adhesion // inferred from electronic annotation /// 7155 // cell adhesion // inferred from electronic annotation
203441_s_at	NM_001792	cadherin 2, type 1, N-cadherin (neuronal)	CDH2	1000	7155 // cell adhesion // traceable author statement /// 7156 // homophilic cell adhesion // inferred from electronic annotation /// 7155 // cell adhesion // inferred from electronic annotation
203474_at	NM_006633	IQ motif containing GTPase activating protein 2	IQGAP2	10788	7165 // signal transduction // traceable author statement /// 51056 // regulation of small GTPase mediated signal transduction // inferred from electronic annotation /// 7264 // small GTPase mediated signal transduction // inferred from electronic annotation /// 46580 // negative regulation of Ras protein signal transduction // inferred from electronic annotation
203476_at	NM_006670	trophoblast glycoprotein	TPBG	7162	6928 // cell motility // not recorded /// 7155 // cell adhesion // non-traceable author statement
203485_at	NM_021136	reticulon 1	RTN1	6252	7165 // signal transduction // non-traceable author statement /// 30182 // neuron differentiation // traceable author statement
203490_at	NM_001421	E74-like factor 4 (ets domain transcription factor)	ELF4	2000	1787 // natural killer cell proliferation // inferred from sequence or structural similarity /// 1866 // NK T cell proliferation // inferred from sequence or structural similarity /// 6350 // transcription // inferred from electronic annotation /// 6355 // regulation of transcription, DNA-dependent // inferred from electronic annotation /// 45944 // positive regulation of transcription from RNA p…
203499_at	NM_004431	EPH receptor A2	EPHA2	1969	6468 // protein amino acid phosphorylation // inferred from electronic annotation /// 7165 // signal transduction // traceable author statement /// 7169 // transmembrane receptor protein tyrosine kinase signaling pathway // inferred from electronic annotation /// 7275 // development // traceable author statement
203505_at	AF285167	ATP-binding cassette, sub-family A (ABC1), member 1	ABCA1	19	6629 // lipid metabolism // inferred from electronic annotation /// 6810 // transport // traceable author statement /// 8202 // steroid metabolism // inferred from electronic annotation /// 8203 // cholesterol metabolism // non-traceable author statement /// 6810 // transport // inferred from electronic annotation /// 8203 // cholesterol metabolism // inferred from electronic annotation /// 8203 …
203509_at	NM_003105	sortilin-related receptor, L(DLR class) A repeats-containing	SORL1	6653	6629 // lipid metabolism // inferred from electronic annotation /// 6869 // lipid transport // inferred from electronic annotation /// 6886 // intracellular protein transport // inferred from electronic annotation /// 6898 // receptor mediated endocytosis // traceable author statement /// 8202 // steroid metabolism // inferred from electronic annotation /// 8203 // cholesterol metabolism // infer…
203510_at	BG170541	met proto-oncogene (hepatocyte growth factor receptor)	MET	4233	6468 // protein amino acid phosphorylation // inferred from electronic annotation /// 7165 // signal transduction // traceable author statement /// 7275 // development // inferred from electronic annotation /// 8283 // cell proliferation // traceable author statement
203523_at	NM_002339	lymphocyte-specific protein 1 /// similar to lymphocyte-specific protein 1 isoform 1	LSP1 /// LOC649377		6928 // cell motility // traceable author statement /// 6968 // cellular defense response // traceable author statement /// 7165 // signal transduction // inferred from electronic annotation
203548_s_at	BF672975	lipoprotein lipase	LPL	4023	6631 // fatty acid metabolism // not recorded /// 8015 // circulation // traceable author statement /// 16042 // lipid catabolism // inferred from electronic annotation /// 6629 // lipid metabolism // inferred from electronic annotation
203549_s_at	NM_000237	lipoprotein lipase	LPL	4023	6631 // fatty acid metabolism // not recorded /// 8015 // circulation // traceable author statement /// 16042 // lipid catabolism // inferred from electronic annotation /// 6629 // lipid metabolism // inferred from electronic annotation
203562_at	NM_005103	fasciculation and elongation protein zeta 1 (zygin I)	FEZ1	9638	7155 // cell adhesion // traceable author statement /// 7399 // nervous system development // traceable author statement /// 7411 // axon guidance // traceable author statement
203567_s_at	AU157590	tripartite motif-containing 38	TRIM38	10475	43123 // positive regulation of I-kappaB kinase/NF-kappaB cascade // inferred from mutant phenotype
203570_at	NM_005576	lysyl oxidase-like 1	LOXL1	4016	6118 // electron transport // traceable author statement /// 18277 // protein amino acid deamination // traceable author statement
203619_s_at	NM_012306	Fas apoptotic inhibitory molecule 2	FAIM2	23017	6915 // apoptosis // inferred from electronic annotation /// 6916 // anti-apoptosis // non-traceable author statement
203632_s_at	NM_016235	G protein-coupled receptor, family C, group 5, member B	GPRC5B	51704	7165 // signal transduction // inferred from electronic annotation /// 7186 // G-protein coupled receptor protein signaling pathway // inferred from electronic annotation /// 7601 // visual perception // inferred from electronic annotation
203638_s_at	NM_022969	fibroblast growth factor receptor 2 (bacteria-expressed kinase, keratinocyte growth factor receptor, craniofacial dysostosis 1, Crouzon syndrome, Pfeiffer syndrome, Jackson-Weiss syndrome)	FGFR2	2263	6468 // protein amino acid phosphorylation // inferred from electronic annotation /// 6468 // protein amino acid phosphorylation // non-traceable author statement /// 16049 // cell growth // non-traceable author statement
203639_s_at	M80634	fibroblast growth factor receptor 2 (bacteria-expressed kinase, keratinocyte growth factor receptor, craniofacial dysostosis 1, Crouzon syndrome, Pfeiffer syndrome, Jackson-Weiss syndrome)	FGFR2	2263	6468 // protein amino acid phosphorylation // inferred from electronic annotation /// 6468 // protein amino acid phosphorylation // non-traceable author statement /// 16049 // cell growth // non-traceable author statement
203665_at	NM_002133	heme oxygenase (decycling) 1	HMOX1	3162	6788 // heme oxidation // inferred from electronic annotation /// 43123 // positive regulation of I-kappaB kinase/NF-kappaB cascade // inferred from mutant phenotype
203697_at	U91903	frizzled-related protein	FRZB	2487	1501 // skeletal development // traceable author statement /// 16055 // Wnt receptor signaling pathway // inferred from electronic annotation /// 30154 // cell differentiation // inferred from electronic annotation /// 30178 // negative regulation of Wnt receptor signaling pathway // inferred from sequence or structural similarity /// 7275 // development // inferred from electronic annotation
203698_s_at	NM_001463	frizzled-related protein	FRZB	2487	1501 // skeletal development // traceable author statement /// 16055 // Wnt receptor signaling pathway // inferred from electronic annotation /// 30154 // cell differentiation // inferred from electronic annotation /// 30178 // negative regulation of Wnt receptor signaling pathway // inferred from sequence or structural similarity /// 7275 // development // inferred from electronic annotation
203705_s_at	AI333651	frizzled homolog 7 (Drosophila)	FZD7	8324	7186 // G-protein coupled receptor protein signaling pathway // inferred from electronic annotation /// 7222 // frizzled signaling pathway // traceable author statement /// 7275 // development // inferred from electronic annotation /// 7165 // signal transduction // inferred from electronic annotation /// 7166 // cell surface receptor linked signal transduction // inferred from electronic annotat…
203706_s_at	NM_003507	frizzled homolog 7 (Drosophila)	FZD7	8324	7186 // G-protein coupled receptor protein signaling pathway // inferred from electronic annotation /// 7222 // frizzled signaling pathway // traceable author statement /// 7275 // development // inferred from electronic annotation /// 7165 // signal transduction // inferred from electronic annotation /// 7166 // cell surface receptor linked signal transduction // inferred from electronic annotat…
203708_at	NM_002600	phosphodiesterase 4B, cAMP-specific (phosphodiesterase E4 dunce homolog, Drosophila)	PDE4B	5142	7165 // signal transduction // inferred from electronic annotation
203726_s_at	NM_000227	laminin, alpha 3	LAMA3	3909	8544 // epidermis development // traceable author statement /// 30155 // regulation of cell adhesion // inferred from electronic annotation /// 30334 // regulation of cell migration // inferred from electronic annotation /// 45995 // regulation of embryonic development // inferred from electronic annotation /// 7155 // cell adhesion // inferred from sequence or structural similarity /// 7166 // c…
203786_s_at	NM_003287	tumor protein D52-like 1	TPD52L1	7164	86 // G2/M transition of mitotic cell cycle // inferred from direct assay /// 6309 // DNA fragmentation during apoptosis // inferred from direct assay /// 6917 // induction of apoptosis // inferred from direct assay /// 43406 // positive regulation of MAPK activity // inferred from direct assay /// 46330 // positive regulation of JNK cascade // inferred from direct assay
203789_s_at	NM_006379	sema domain, immunoglobulin domain (Ig), short basic domain, secreted, (semaphorin) 3C	SEMA3C	10512	6955 // immune response // traceable author statement /// 7169 // transmembrane receptor protein tyrosine kinase signaling pathway // non-traceable author statement /// 7275 // development // inferred from electronic annotation /// 42493 // response to drug // traceable author statement
203798_s_at	NM_003385	visinin-like 1	VSNL1	7447	---
203813_s_at	NM_003062	slit homolog 3 (Drosophila)	SLIT3	6586	7417 // central nervous system development // traceable author statement /// 30154 // cell differentiation // inferred from electronic annotation /// 7275 // development // inferred from electronic annotation /// 7399 // nervous system development // inferred from electronic annotation /// 7275 // development // traceable author statement
203815_at	NM_000853	glutathione S-transferase theta 1	GSTT1	2952	6950 // response to stress // not recorded
203817_at	W93728	guanylate cyclase 1, soluble, beta 3	GUCY1B3	2983	6182 // cGMP biosynthesis // inferred from electronic annotation /// 7263 // nitric oxide mediated signal transduction // traceable author statement /// 8015 // circulation // traceable author statement /// 7242 // intracellular signaling cascade // inferred from electronic annotation /// 9190 // cyclic nucleotide biosynthesis // inferred from electronic annotation
203824_at	NM_004616	tetraspanin 8	TSPAN8	7103	6486 // protein amino acid glycosylation // traceable author statement
203849_s_at	BG473130	kinesin family member 1A	KIF1A	547	7018 // microtubule-based movement // inferred from electronic annotation /// 8089 // anterograde axon cargo transport // traceable author statement
203862_s_at	H16245	actinin, alpha 2	ACTN2	88	7155 // cell adhesion // traceable author statement /// 30035 // microspike biogenesis // inferred from direct assay /// 42981 // regulation of apoptosis // non-traceable author statement /// 48041 // focal adhesion formation // inferred from mutant phenotype /// 51289 // protein homotetramerization // inferred from direct assay
203863_at	W63731	---	---		---
203879_at	U86453	phosphoinositide-3-kinase, catalytic, delta polypeptide /// phosphoinositide-3-kinase, catalytic, delta polypeptide	PIK3CD	5293	6468 // protein amino acid phosphorylation // non-traceable author statement /// 7165 // signal transduction // inferred from electronic annotation /// 7165 // signal transduction // non-traceable author statement
203881_s_at	NM_004010	dystrophin (muscular dystrophy, Duchenne and Becker types)	DMD	1756	6936 // muscle contraction // not recorded /// 7016 // cytoskeletal anchoring // inferred from sequence or structural similarity /// 7016 // cytoskeletal anchoring // non-traceable author statement /// 7517 // muscle development // non-traceable author statement /// 43043 // peptide biosynthesis // inferred from direct assay
203889_at	NM_003020	secretogranin V (7B2 protein)	SCG5	6447	6457 // protein folding // inferred from electronic annotation /// 6810 // transport // inferred from electronic annotation /// 6886 // intracellular protein transport // inferred from sequence or structural similarity /// 7218 // neuropeptide signaling pathway // inferred from electronic annotation /// 16486 // peptide hormone processing // inferred from sequence or structural similarity /// 468…
203895_at	AL535113	phospholipase C, beta 4	PLCB4	5332	6629 // lipid metabolism // inferred from electronic annotation /// 7242 // intracellular signaling cascade // inferred from electronic annotation /// 16042 // lipid catabolism // inferred from electronic annotation /// 7165 // signal transduction // inferred from electronic annotation
203896_s_at	NM_000933	phospholipase C, beta 4	PLCB4	5332	6629 // lipid metabolism // inferred from electronic annotation /// 7242 // intracellular signaling cascade // inferred from electronic annotation /// 16042 // lipid catabolism // inferred from electronic annotation /// 7165 // signal transduction // inferred from electronic annotation
203904_x_at	NM_002231	CD82 molecule	CD82	3732	---
203910_at	NM_004815	Rho GTPase activating protein 29	ARHGAP29	9411	7242 // intracellular signaling cascade // inferred from electronic annotation /// 7266 // Rho protein signal transduction // traceable author statement /// 7165 // signal transduction // inferred from electronic annotation /// 46080 // dUTP metabolism // inferred from electronic annotation
203913_s_at	AL574184	hydroxyprostaglandin dehydrogenase 15-(NAD)	HPGD	3248	6629 // lipid metabolism // inferred from electronic annotation /// 6631 // fatty acid metabolism // inferred from electronic annotation /// 6693 // prostaglandin metabolism // traceable author statement /// 7179 // transforming growth factor beta receptor signaling pathway // inferred from direct assay /// 7565 // pregnancy // inferred from direct assay /// 7567 // parturition // inferred from d…
203929_s_at	AI056359	microtubule-associated protein tau	MAPT	4137	226 // microtubule cytoskeleton organization and biogenesis // inferred from direct assay /// 226 // microtubule cytoskeleton organization and biogenesis // inferred from sequence or structural similarity /// 7026 // negative regulation of microtubule depolymerization // inferred from sequence or structural similarity /// 7026 // negative regulation of microtubule depolymerization // non-traceabl…
203939_at	NM_002526	5'-nucleotidase, ecto (CD73)	NT5E	4907	6259 // DNA metabolism // traceable author statement /// 9166 // nucleotide catabolism // inferred from electronic annotation
203961_at	AL157398	nebulette	NEBL	10529	30832 // regulation of actin filament length // traceable author statement
203963_at	NM_001218	carbonic anhydrase XII	CA12	771	6730 // one-carbon compound metabolism // inferred from electronic annotation
203964_at	NM_004688	N-myc (and STAT) interactor	NMI	9111	6366 // transcription from RNA polymerase II promoter // traceable author statement /// 6954 // inflammatory response // traceable author statement /// 7259 // JAK-STAT cascade // traceable author statement
203979_at	NM_000784	cytochrome P450, family 27, subfamily A, polypeptide 1	CYP27A1	1593	6118 // electron transport // inferred from electronic annotation
203997_at	NM_002829	protein tyrosine phosphatase, non-receptor type 3	PTPN3	5774	6470 // protein amino acid dephosphorylation // inferred from electronic annotation /// 6470 // protein amino acid dephosphorylation // traceable author statement
203998_s_at	AV723167	synaptotagmin I	SYT1	6857	5513 // detection of calcium ion // traceable author statement /// 6810 // transport // inferred from electronic annotation /// 7268 // synaptic transmission // traceable author statement /// 7269 // neurotransmitter secretion // traceable author statement /// 17157 // regulation of exocytosis // traceable author statement /// 51260 // protein homooligomerization // traceable author statement
203999_at	AV731490	---	---		---
204004_at	AI336206	PRKC, apoptosis, WT1, regulator	PAWR	5074	6350 // transcription // inferred from electronic annotation /// 6355 // regulation of transcription, DNA-dependent // inferred from electronic annotation /// 6915 // apoptosis // inferred from electronic annotation /// 43065 // positive regulation of apoptosis // non-traceable author statement
204005_s_at	NM_002583	PRKC, apoptosis, WT1, regulator	PAWR	5074	6350 // transcription // inferred from electronic annotation /// 6355 // regulation of transcription, DNA-dependent // inferred from electronic annotation /// 6915 // apoptosis // inferred from electronic annotation /// 43065 // positive regulation of apoptosis // non-traceable author statement
204011_at	NM_005842	sprouty homolog 2 (Drosophila)	SPRY2	10253	7267 // cell-cell signaling // traceable author statement /// 7275 // development // inferred from electronic annotation /// 9887 // organ morphogenesis // traceable author statement /// 9966 // regulation of signal transduction // inferred from electronic annotation /// 7165 // signal transduction // traceable author statement
204014_at	NM_001394	dual specificity phosphatase 4	DUSP4	1846	74 // regulation of progression through cell cycle // non-traceable author statement /// 165 // MAPKKK cascade // traceable author statement /// 6470 // protein amino acid dephosphorylation // inferred from electronic annotation /// 6470 // protein amino acid dephosphorylation // traceable author statement
204015_s_at	BC002671	dual specificity phosphatase 4	DUSP4	1846	74 // regulation of progression through cell cycle // non-traceable author statement /// 165 // MAPKKK cascade // traceable author statement /// 6470 // protein amino acid dephosphorylation // inferred from electronic annotation /// 6470 // protein amino acid dephosphorylation // traceable author statement
204017_at	NM_006855	KDEL (Lys-Asp-Glu-Leu) endoplasmic reticulum protein retention receptor 3	KDELR3	11015	6621 // protein retention in ER // inferred from electronic annotation /// 6888 // ER to Golgi vesicle-mediated transport // inferred from electronic annotation /// 15031 // protein transport // inferred from electronic annotation /// 6810 // transport // inferred from electronic annotation
204030_s_at	NM_014575	schwannomin interacting protein 1	SCHIP1	29970	---
204032_at	NM_003567	breast cancer anti-estrogen resistance 3	BCAR3	8412	74 // regulation of progression through cell cycle // traceable author statement /// 7264 // small GTPase mediated signal transduction // inferred from electronic annotation /// 42493 // response to drug // traceable author statement /// 7242 // intracellular signaling cascade // inferred from electronic annotation /// 7165 // signal transduction // traceable author statement
204035_at	NM_003469	secretogranin II (chromogranin C)	SCG2	7857	165 // MAPKKK cascade // inferred from direct assay /// 1525 // angiogenesis // inferred from direct assay /// 1937 // negative regulation of endothelial cell proliferation // traceable author statement /// 6928 // cell motility // inferred from direct assay /// 6954 // inflammatory response // traceable author statement /// 7242 // intracellular signaling cascade // inferred from direct assay //…
204036_at	AW269335	endothelial differentiation, lysophosphatidic acid G-protein-coupled receptor, 2	EDG2	1902	7165 // signal transduction // inferred from electronic annotation /// 7186 // G-protein coupled receptor protein signaling pathway // inferred from electronic annotation /// 7186 // G-protein coupled receptor protein signaling pathway // traceable author statement /// 7202 // phospholipase C activation // traceable author statement /// 7204 // elevation of cytosolic calcium ion concentration // …
204039_at	NM_004364	CCAAT/enhancer binding protein (C/EBP), alpha	CEBPA	1050	6091 // generation of precursor metabolites and energy // traceable author statement /// 6350 // transcription // inferred from direct assay /// 6350 // transcription // non-traceable author statement /// 6355 // regulation of transcription, DNA-dependent // inferred from electronic annotation /// 6366 // transcription from RNA polymerase II promoter // traceable author statement /// 19221 // cyt…
204042_at	AB020707	WAS protein family, member 3	WASF3	10810	6461 // protein complex assembly // traceable author statement /// 30041 // actin filament polymerization // traceable author statement
204058_at	AL049699	Malic enzyme 1, NADP(+)-dependent, cytosolic	ME1	4199	5975 // carbohydrate metabolism // non-traceable author statement /// 6108 // malate metabolism // inferred from direct assay /// 6741 // NADP biosynthesis // traceable author statement /// 9725 // response to hormone stimulus // inferred from sequence or structural similarity /// 9743 // response to carbohydrate stimulus // traceable author statement /// 6108 // malate metabolism // inferred fro…
204059_s_at	NM_002395	malic enzyme 1, NADP(+)-dependent, cytosolic	ME1	4199	5975 // carbohydrate metabolism // non-traceable author statement /// 6108 // malate metabolism // inferred from direct assay /// 6741 // NADP biosynthesis // traceable author statement /// 9725 // response to hormone stimulus // inferred from sequence or structural similarity /// 9743 // response to carbohydrate stimulus // traceable author statement /// 6108 // malate metabolism // inferred fro…
204069_at	NM_002398	Meis1, myeloid ecotropic viral integration site 1 homolog (mouse)	MEIS1	4211	6355 // regulation of transcription, DNA-dependent // inferred from electronic annotation /// 7275 // development // inferred from electronic annotation /// 6350 // transcription // inferred from electronic annotation /// 45449 // regulation of transcription // inferred from electronic annotation
204083_s_at	NM_003289	tropomyosin 2 (beta)	TPM2	7169	---
204086_at	NM_006115	preferentially expressed antigen in melanoma	PRAME	23532	---
204105_s_at	NM_005010	neuronal cell adhesion molecule	NRCAM	4897	1764 // neuron migration // non-traceable author statement /// 7413 // axonal fasciculation // non-traceable author statement /// 7416 // synaptogenesis // traceable author statement /// 7417 // central nervous system development // non-traceable author statement /// 16337 // cell-cell adhesion // non-traceable author statement /// 30516 // regulation of axon extension // non-traceable author sta…
204112_s_at	NM_006895	histamine N-methyltransferase	HNMT	3176	7585 // respiratory gaseous exchange // traceable author statement
204114_at	NM_007361	nidogen 2 (osteonidogen)	NID2	22795	7155 // cell adhesion // traceable author statement /// 7160 // cell-matrix adhesion // inferred from electronic annotation /// 7155 // cell adhesion // inferred from electronic annotation
204115_at	NM_004126	guanine nucleotide binding protein (G protein), gamma 11	GNG11	2791	7165 // signal transduction // inferred from electronic annotation /// 7186 // G-protein coupled receptor protein signaling pathway // inferred from electronic annotation
204152_s_at	AI738965	manic fringe homolog (Drosophila)	MFNG	4242	7389 // pattern specification // traceable author statement /// 7275 // development // inferred from electronic annotation
204154_at	NM_001801	cysteine dioxygenase, type I	CDO1	1036	97 // sulfur amino acid biosynthesis // traceable author statement /// 6118 // electron transport // traceable author statement /// 6954 // inflammatory response // traceable author statement /// 42412 // taurine biosynthesis // traceable author statement /// 46439 // L-cysteine metabolism // inferred from electronic annotation /// 6534 // cysteine metabolism // traceable author statement
204158_s_at	NM_006019	T-cell, immune regulator 1, ATPase, H+ transporting, lysosomal V0 subunit A3	TCIRG1	10312	6811 // ion transport // inferred from electronic annotation /// 6968 // cellular defense response // traceable author statement /// 8284 // positive regulation of cell proliferation // traceable author statement /// 15992 // proton transport // traceable author statement /// 6810 // transport // inferred from electronic annotation /// 15992 // proton transport // inferred from electronic annotat…
204163_at	NM_007046	elastin microfibril interfacer 1	EMILIN1	11117	6817 // phosphate transport // inferred from electronic annotation /// 7155 // cell adhesion // traceable author statement /// 7155 // cell adhesion // inferred from electronic annotation
204192_at	NM_001774	CD37 molecule	CD37	951	6487 // protein amino acid N-linked glycosylation // traceable author statement
204197_s_at	NM_004350	runt-related transcription factor 3	RUNX3	864	6350 // transcription // inferred from electronic annotation /// 6355 // regulation of transcription, DNA-dependent // non-traceable author statement /// 6366 // transcription from RNA polymerase II promoter // traceable author statement /// 6917 // induction of apoptosis // inferred from sequence or structural similarity /// 8283 // cell proliferation // non-traceable author statement /// 45786 …
204198_s_at	AA541630	runt-related transcription factor 3	RUNX3	864	6350 // transcription // inferred from electronic annotation /// 6355 // regulation of transcription, DNA-dependent // non-traceable author statement /// 6366 // transcription from RNA polymerase II promoter // traceable author statement /// 6917 // induction of apoptosis // inferred from sequence or structural similarity /// 8283 // cell proliferation // non-traceable author statement /// 45786 …
204201_s_at	NM_006264	protein tyrosine phosphatase, non-receptor type 13 (APO-1/CD95 (Fas)-associated phosphatase)	PTPN13	5783	6470 // protein amino acid dephosphorylation // traceable author statement /// 6470 // protein amino acid dephosphorylation // inferred from electronic annotation
204205_at	NM_021822	apolipoprotein B mRNA editing enzyme, catalytic polypeptide-like 3G	APOBEC3G	60489	9615 // response to virus // inferred from electronic annotation /// 16070 // RNA metabolism // non-traceable author statement /// 45087 // innate immune response // non-traceable author statement /// 45869 // negative regulation of retroviral genome replication // non-traceable author statement
204220_at	NM_004877	glia maturation factor, gamma	GMFG	9535	6468 // protein amino acid phosphorylation // traceable author statement
204222_s_at	NM_006851	GLI pathogenesis-related 1 (glioma)	GLIPR1	11010	---
204224_s_at	NM_000161	GTP cyclohydrolase 1 (dopa-responsive dystonia)	GCH1	2643	6559 // L-phenylalanine catabolism // inferred from electronic annotation /// 6729 // tetrahydrobiopterin biosynthesis // inferred from electronic annotation /// 6809 // nitric oxide biosynthesis // traceable author statement /// 19438 // aromatic compound biosynthesis // inferred from electronic annotation /// 42133 // neurotransmitter metabolism // traceable author statement
204235_s_at	AF200715	GULP, engulfment adaptor PTB domain containing 1	GULP1	51454	6911 // phagocytosis, engulfment // inferred from direct assay /// 6911 // phagocytosis, engulfment // traceable author statement /// 6915 // apoptosis // traceable author statement
204236_at	NM_002017	Friend leukemia virus integration 1	FLI1	2313	6350 // transcription // inferred from electronic annotation /// 6355 // regulation of transcription, DNA-dependent // inferred from electronic annotation /// 7599 // hemostasis // traceable author statement /// 9887 // organ morphogenesis // traceable author statement
204237_at	NM_016315	GULP, engulfment adaptor PTB domain containing 1	GULP1	51454	6911 // phagocytosis, engulfment // inferred from direct assay /// 6911 // phagocytosis, engulfment // traceable author statement /// 6915 // apoptosis // traceable author statement
204249_s_at	NM_005574	LIM domain only 2 (rhombotin-like 1)	LMO2	4005	7275 // development // traceable author statement
204254_s_at	NM_000376	vitamin D (1,25- dihydroxyvitamin D3) receptor	VDR	7421	6350 // transcription // inferred from electronic annotation /// 6355 // regulation of transcription, DNA-dependent // inferred from electronic annotation /// 7165 // signal transduction // traceable author statement /// 16481 // negative regulation of transcription // inferred from direct assay
204260_at	NM_001819	chromogranin B (secretogranin 1) /// MON2 homolog (S. cerevisiae)	CHGB /// MON2		6895 // Golgi to endosome transport // inferred from sequence or structural similarity
204268_at	NM_005978	S100 calcium binding protein A2	S100A2	6273	43542 // endothelial cell migration // inferred from mutant phenotype
204273_at	NM_000115	endothelin receptor type B	EDNRB	1910	7194 // negative regulation of adenylate cyclase activity // traceable author statement /// 7200 // G-protein signaling, coupled to IP3 second messenger (phospholipase C activating) // traceable author statement /// 7399 // nervous system development // traceable author statement /// 7605 // sensory perception of sound // inferred from electronic annotation /// 7165 // signal transduction // infe…
204279_at	NM_002800	proteasome (prosome, macropain) subunit, beta type, 9 (large multifunctional peptidase 2)	PSMB9	5698	6508 // proteolysis // not recorded /// 6511 // ubiquitin-dependent protein catabolism // inferred from electronic annotation /// 6955 // immune response // inferred from electronic annotation /// 9966 // regulation of signal transduction // inferred from electronic annotation
204288_s_at	NM_021069	sorbin and SH3 domain containing 2	SORBS2	8470	6810 // transport // inferred from electronic annotation
204298_s_at	NM_002317	lysyl oxidase	LOX	4015	6464 // protein modification // traceable author statement /// 7169 // transmembrane receptor protein tyrosine kinase signaling pathway // non-traceable author statement
204304_s_at	NM_006017	prominin 1	PROM1	8842	7601 // visual perception // inferred from electronic annotation /// 50896 // response to stimulus // inferred from electronic annotation
204337_at	AL514445	regulator of G-protein signalling 4	RGS4	5999	188 // inactivation of MAPK activity // traceable author statement /// 8277 // regulation of G-protein coupled receptor protein signaling pathway // traceable author statement /// 9968 // negative regulation of signal transduction // inferred from electronic annotation
204338_s_at	NM_005613	regulator of G-protein signalling 4	RGS4	5999	188 // inactivation of MAPK activity // traceable author statement /// 8277 // regulation of G-protein coupled receptor protein signaling pathway // traceable author statement /// 9968 // negative regulation of signal transduction // inferred from electronic annotation
204339_s_at	BC000737	regulator of G-protein signalling 4	RGS4	5999	188 // inactivation of MAPK activity // traceable author statement /// 8277 // regulation of G-protein coupled receptor protein signaling pathway // traceable author statement /// 9968 // negative regulation of signal transduction // inferred from electronic annotation
204343_at	NM_001089	ATP-binding cassette, sub-family A (ABC1), member 3	ABCA3	21	6810 // transport // inferred from direct assay /// 42493 // response to drug // traceable author statement /// 6810 // transport // inferred from electronic annotation /// 6810 // transport // traceable author statement
204359_at	NM_013231	fibronectin leucine rich transmembrane protein 2	FLRT2	23768	7155 // cell adhesion // inferred from electronic annotation
204361_s_at	AB014486	src family associated phosphoprotein 2	SCAP2	8935	6461 // protein complex assembly // traceable author statement /// 7165 // signal transduction // traceable author statement
204362_at	NM_003930	src family associated phosphoprotein 2	SCAP2	8935	6461 // protein complex assembly // traceable author statement /// 7165 // signal transduction // traceable author statement
204363_at	NM_001993	coagulation factor III (thromboplastin, tissue factor)	F3	2152	6955 // immune response // not recorded /// 7596 // blood coagulation // inferred from electronic annotation /// 7596 // blood coagulation // not recorded
204364_s_at	BE535746	receptor accessory protein 1	REEP1	65055	---
204365_s_at	NM_022912	receptor accessory protein 1	REEP1	65055	---
204379_s_at	NM_000142	fibroblast growth factor receptor 3 (achondroplasia, thanatophoric dwarfism)	FGFR3	2261	165 // MAPKKK cascade // traceable author statement /// 1501 // skeletal development // traceable author statement /// 6468 // protein amino acid phosphorylation // inferred from electronic annotation /// 7259 // JAK-STAT cascade // traceable author statement /// 8543 // fibroblast growth factor receptor signaling pathway // traceable author statement /// 16049 // cell growth // non-traceable aut…
204388_s_at	NM_000240	monoamine oxidase A	MAOA	4128	6118 // electron transport // inferred from electronic annotation /// 6584 // catecholamine metabolism // inferred from electronic annotation /// 7610 // behavior // traceable author statement /// 42135 // neurotransmitter catabolism // inferred from electronic annotation /// 6576 // biogenic amine metabolism // traceable author statement
204400_at	NM_005864	embryonal Fyn-associated substrate	EFS	10278	7155 // cell adhesion // inferred from electronic annotation /// 7242 // intracellular signaling cascade // traceable author statement
204401_at	NM_002250	potassium intermediate/small conductance calcium-activated channel, subfamily N, member 4	KCNN4	3783	6811 // ion transport // inferred from electronic annotation /// 6813 // potassium ion transport // traceable author statement /// 6952 // defense response // traceable author statement /// 6810 // transport // inferred from electronic annotation /// 6813 // potassium ion transport // inferred from electronic annotation
204409_s_at	BC005248	eukaryotic translation initiation factor 1A, Y-linked	EIF1AY	9086	6412 // protein biosynthesis // inferred from electronic annotation /// 6413 // translational initiation // inferred from electronic annotation
204410_at	NM_004681	eukaryotic translation initiation factor 1A, Y-linked	EIF1AY	9086	6412 // protein biosynthesis // inferred from electronic annotation /// 6413 // translational initiation // inferred from electronic annotation
204411_at	NM_017596	kinesin family member 21B	KIF21B	23046	7018 // microtubule-based movement // inferred from electronic annotation
204412_s_at	NM_021076	neurofilament, heavy polypeptide 200kDa	NEFH	4744	6334 // nucleosome assembly // inferred from electronic annotation /// 7399 // nervous system development // non-traceable author statement
204416_x_at	NM_001645	apolipoprotein C-I	APOC1	341	6629 // lipid metabolism // traceable author statement /// 6869 // lipid transport // inferred from electronic annotation /// 42157 // lipoprotein metabolism // inferred from electronic annotation /// 6810 // transport // inferred from electronic annotation
204420_at	BG251266	FOS-like antigen 1	FOSL1	8061	6357 // regulation of transcription from RNA polymerase II promoter // traceable author statement /// 6935 // chemotaxis // traceable author statement /// 6968 // cellular defense response // traceable author statement /// 8284 // positive regulation of cell proliferation // traceable author statement /// 9615 // response to virus // traceable author statement /// 6355 // regulation of transcript…
204424_s_at	AL050152	LIM domain only 3 (rhombotin-like 2)	LMO3	55885	6350 // transcription // inferred from electronic annotation /// 6355 // regulation of transcription, DNA-dependent // inferred from electronic annotation
204428_s_at	NM_000229	lecithin-cholesterol acyltransferase	LCAT	3931	6629 // lipid metabolism // inferred from electronic annotation /// 8202 // steroid metabolism // inferred from electronic annotation /// 8203 // cholesterol metabolism // non-traceable author statement /// 18350 // protein amino acid esterification // non-traceable author statement /// 8203 // cholesterol metabolism // inferred from electronic annotation
204431_at	NM_003260	transducin-like enhancer of split 2 (E(sp1) homolog, Drosophila)	TLE2	7089	6355 // regulation of transcription, DNA-dependent // inferred from electronic annotation /// 7165 // signal transduction // traceable author statement /// 7222 // frizzled signaling pathway // inferred from electronic annotation /// 9887 // organ morphogenesis // traceable author statement /// 6350 // transcription // inferred from electronic annotation /// 16055 // Wnt receptor signaling pathwa…
204439_at	NM_006820	interferon-induced protein 44-like	IFI44L	10964	---
204454_at	NM_012317	leucine zipper, down-regulated in cancer 1	LDOC1	23641	8285 // negative regulation of cell proliferation // traceable author statement
204456_s_at	AW611727	growth arrest-specific 1	GAS1	2619	7049 // cell cycle // inferred from electronic annotation /// 7050 // cell cycle arrest // traceable author statement /// 8285 // negative regulation of cell proliferation // traceable author statement /// 45749 // negative regulation of S phase of mitotic cell cycle // non-traceable author statement /// 7050 // cell cycle arrest // inferred from electronic annotation
204457_s_at	NM_002048	growth arrest-specific 1	GAS1	2619	7049 // cell cycle // inferred from electronic annotation /// 7050 // cell cycle arrest // traceable author statement /// 8285 // negative regulation of cell proliferation // traceable author statement /// 45749 // negative regulation of S phase of mitotic cell cycle // non-traceable author statement /// 7050 // cell cycle arrest // inferred from electronic annotation
204463_s_at	AU118882	endothelin receptor type A	EDNRA	1909	6939 // smooth muscle contraction // non-traceable author statement /// 7165 // signal transduction // traceable author statement /// 7186 // G-protein coupled receptor protein signaling pathway // non-traceable author statement /// 7190 // adenylate cyclase activation // traceable author statement /// 7202 // phospholipase C activation // traceable author statement /// 7204 // elevation of cytos…
204465_s_at	NM_004692	internexin neuronal intermediate filament protein, alpha	INA	9118	7399 // nervous system development // inferred from electronic annotation /// 30154 // cell differentiation // inferred from electronic annotation /// 7275 // development // inferred from electronic annotation
204466_s_at	BG260394	synuclein, alpha (non A4 component of amyloid precursor) /// synuclein, alpha (non A4 component of amyloid precursor)	SNCA	6622	6916 // anti-apoptosis // traceable author statement /// 7417 // central nervous system development // traceable author statement
204471_at	NM_002045	growth associated protein 43	GAP43	2596	1558 // regulation of cell growth // inferred from electronic annotation /// 7205 // protein kinase C activation // traceable author statement /// 7399 // nervous system development // inferred from electronic annotation /// 9611 // response to wounding // traceable author statement /// 30154 // cell differentiation // inferred from electronic annotation /// 40008 // regulation of growth // infer…
204472_at	NM_005261	GTP binding protein overexpressed in skeletal muscle	GEM	2669	6955 // immune response // traceable author statement /// 7166 // cell surface receptor linked signal transduction // traceable author statement /// 7264 // small GTPase mediated signal transduction // inferred from electronic annotation /// 7165 // signal transduction // traceable author statement
204490_s_at	M24915	CD44 molecule (Indian blood group)	CD44	960	7155 // cell adhesion // inferred from electronic annotation /// 7160 // cell-matrix adhesion // non-traceable author statement /// 16337 // cell-cell adhesion // non-traceable author statement
204508_s_at	BC001012	carbonic anhydrase XII	CA12	771	6730 // one-carbon compound metabolism // inferred from electronic annotation /// 6461 // protein complex assembly // inferred from electronic annotation /// 6810 // transport // inferred from electronic annotation /// 6886 // intracellular protein transport // inferred from electronic annotation /// 6897 // endocytosis // inferred from electronic annotation /// 15031 // protein transport // infe…
204513_s_at	NM_014800	engulfment and cell motility 1	ELMO1	9844	6909 // phagocytosis // inferred from electronic annotation /// 6911 // phagocytosis, engulfment // inferred from genetic interaction /// 6915 // apoptosis // inferred from electronic annotation /// 6915 // apoptosis // non-traceable author statement /// 6928 // cell motility // inferred from genetic interaction /// 16601 // Rac protein signal transduction // inferred from genetic interaction ///…
204517_at	BE962749	peptidylprolyl isomerase C (cyclophilin C)	PPIC	5480	6457 // protein folding // inferred from electronic annotation /// 7165 // signal transduction // traceable author statement
204518_s_at	NM_000943	peptidylprolyl isomerase C (cyclophilin C)	PPIC	5480	6457 // protein folding // inferred from electronic annotation /// 7165 // signal transduction // traceable author statement
204529_s_at	AI961231	thymus high mobility group box protein TOX	TOX	9760	6355 // regulation of transcription, DNA-dependent // inferred from electronic annotation
204584_at	AI653981	L1 cell adhesion molecule	L1CAM	3897	7155 // cell adhesion // non-traceable author statement /// 7399 // nervous system development // traceable author statement /// 30154 // cell differentiation // inferred from electronic annotation /// 7155 // cell adhesion // inferred from electronic annotation /// 7275 // development // inferred from electronic annotation /// 7399 // nervous system development // inferred from electronic annota…
204597_x_at	NM_003155	stanniocalcin 1	STC1	6781	6874 // calcium ion homeostasis // traceable author statement /// 7166 // cell surface receptor linked signal transduction // traceable author statement /// 7267 // cell-cell signaling // traceable author statement /// 7584 // response to nutrient // traceable author statement
204619_s_at	BF590263	chondroitin sulfate proteoglycan 2 (versican)	CSPG2	1462	7155 // cell adhesion // traceable author statement /// 7275 // development // traceable author statement /// 8037 // cell recognition // traceable author statement /// 7155 // cell adhesion // inferred from electronic annotation
204620_s_at	NM_004385	chondroitin sulfate proteoglycan 2 (versican)	CSPG2	1462	7155 // cell adhesion // traceable author statement /// 7275 // development // traceable author statement /// 8037 // cell recognition // traceable author statement /// 7155 // cell adhesion // inferred from electronic annotation
204621_s_at	AI935096	nuclear receptor subfamily 4, group A, member 2	NR4A2	4929	6350 // transcription // inferred from electronic annotation /// 6355 // regulation of transcription, DNA-dependent // inferred from electronic annotation /// 7165 // signal transduction // non-traceable author statement /// 19735 // antimicrobial humoral response (sensu Vertebrata) // traceable author statement
204639_at	NM_000022	adenosine deaminase	ADA	100	9117 // nucleotide metabolism // inferred from electronic annotation /// 9168 // purine ribonucleoside monophosphate biosynthesis // inferred from electronic annotation /// 19735 // antimicrobial humoral response (sensu Vertebrata) // traceable author statement
204646_at	NM_000110	dihydropyrimidine dehydrogenase	DPYD	1806	6118 // electron transport // inferred from electronic annotation /// 6207 // 'de novo' pyrimidine base biosynthesis // inferred from electronic annotation /// 6212 // uracil catabolism // non-traceable author statement /// 6214 // thymidine catabolism // non-traceable author statement
204653_at	BF343007	transcription factor AP-2 alpha (activating enhancer binding protein 2 alpha)	TFAP2A	7020	6350 // transcription // inferred from electronic annotation /// 6355 // regulation of transcription, DNA-dependent // inferred from electronic annotation /// 6357 // regulation of transcription from RNA polymerase II promoter // traceable author statement /// 7165 // signal transduction // not recorded /// 7398 // ectoderm development // traceable author statement
204679_at	NM_002245	potassium channel, subfamily K, member 1	KCNK1	3775	6811 // ion transport // inferred from electronic annotation /// 6813 // potassium ion transport // inferred from electronic annotation /// 6813 // potassium ion transport // traceable author statement /// 6810 // transport // inferred from electronic annotation
204681_s_at	NM_012294	Rap guanine nucleotide exchange factor (GEF) 5	RAPGEF5	9771	6350 // transcription // inferred from electronic annotation /// 6355 // regulation of transcription, DNA-dependent // inferred from electronic annotation /// 7264 // small GTPase mediated signal transduction // inferred from electronic annotation /// 7399 // nervous system development // non-traceable author statement /// 51056 // regulation of small GTPase mediated signal transduction // inferr…
204683_at	NM_000873	intercellular adhesion molecule 2	ICAM2	3384	16337 // cell-cell adhesion // inferred from electronic annotation /// 7155 // cell adhesion // inferred from electronic annotation
204698_at	NM_002201	interferon stimulated exonuclease gene 20kDa	ISG20	3669	738 // DNA catabolism, exonucleolytic // inferred from direct assay /// 6401 // RNA catabolism // inferred from direct assay /// 8283 // cell proliferation // traceable author statement /// 9615 // response to virus // inferred from direct assay
204704_s_at	BF195998	aldolase B, fructose-bisphosphate	ALDOB	229	6000 // fructose metabolism // traceable author statement /// 6096 // glycolysis // traceable author statement /// 8152 // metabolism // inferred from electronic annotation /// 6096 // glycolysis // inferred from electronic annotation
204720_s_at	AV729634	DnaJ (Hsp40) homolog, subfamily C, member 6	DNAJC6	9829	6457 // protein folding // inferred from electronic annotation /// 6470 // protein amino acid dephosphorylation // inferred from electronic annotation
204722_at	AW007335	sodium channel, voltage-gated, type III, beta	SCN3B	55800	6811 // ion transport // inferred from electronic annotation /// 6814 // sodium ion transport // non-traceable author statement /// 6810 // transport // inferred from electronic annotation /// 6814 // sodium ion transport // inferred from electronic annotation
204723_at	AB032984	sodium channel, voltage-gated, type III, beta	SCN3B	55800	6811 // ion transport // inferred from electronic annotation /// 6814 // sodium ion transport // non-traceable author statement /// 6810 // transport // inferred from electronic annotation /// 6814 // sodium ion transport // inferred from electronic annotation
204724_s_at	NM_001853	collagen, type IX, alpha 3	COL9A3	1299	6817 // phosphate transport // inferred from electronic annotation
204736_s_at	NM_001897	chondroitin sulfate proteoglycan 4 (melanoma-associated)	CSPG4	1464	1525 // angiogenesis // inferred from electronic annotation /// 7165 // signal transduction // inferred from electronic annotation /// 9888 // tissue development // inferred from electronic annotation /// 30154 // cell differentiation // inferred from electronic annotation /// 7275 // development // inferred from electronic annotation
204743_at	NM_013259	transgelin 3	TAGLN3	29114	7417 // central nervous system development // traceable author statement /// 7517 // muscle development // inferred from electronic annotation
204748_at	NM_000963	prostaglandin-endoperoxide synthase 2 (prostaglandin G/H synthase and cyclooxygenase)	PTGS2	5743	1516 // prostaglandin biosynthesis // inferred from electronic annotation /// 6633 // fatty acid biosynthesis // inferred from electronic annotation /// 6928 // cell motility // traceable author statement /// 7582 // physiological process // traceable author statement /// 8217 // blood pressure regulation // inferred from sequence or structural similarity /// 19371 // cyclooxygenase pathway // no…
204749_at	NM_004538	nucleosome assembly protein 1-like 3	NAP1L3	4675	6334 // nucleosome assembly // traceable author statement /// 6334 // nucleosome assembly // inferred from electronic annotation
204778_x_at	AW102783	homeobox B7	HOXB7	3217	6355 // regulation of transcription, DNA-dependent // inferred from electronic annotation /// 6355 // regulation of transcription, DNA-dependent // non-traceable author statement /// 7275 // development // non-traceable author statement /// 6350 // transcription // inferred from electronic annotation /// 7275 // development // inferred from electronic annotation /// 45449 // regulation of transcr…
204779_s_at	NM_004502	homeobox B7	HOXB7	3217	6355 // regulation of transcription, DNA-dependent // inferred from electronic annotation /// 6355 // regulation of transcription, DNA-dependent // non-traceable author statement /// 7275 // development // non-traceable author statement /// 6350 // transcription // inferred from electronic annotation /// 7275 // development // inferred from electronic annotation /// 45449 // regulation of transcr…
204794_at	NM_004418	dual specificity phosphatase 2	DUSP2	1844	188 // inactivation of MAPK activity // traceable author statement /// 6470 // protein amino acid dephosphorylation // inferred from electronic annotation /// 6470 // protein amino acid dephosphorylation // traceable author statement
204823_at	NM_014903	neuron navigator 3	NAV3	89795	---
204836_at	NM_000170	glycine dehydrogenase (decarboxylating)	GLDC	2731	6544 // glycine metabolism // inferred from electronic annotation /// 6546 // glycine catabolism // traceable author statement
204844_at	L12468	glutamyl aminopeptidase (aminopeptidase A)	ENPEP	2028	6508 // proteolysis // inferred from electronic annotation /// 7267 // cell-cell signaling // traceable author statement /// 8283 // cell proliferation // inferred from direct assay /// 16477 // cell migration // inferred from direct assay /// 8283 // cell proliferation // traceable author statement
204848_x_at	NM_000559	hemoglobin, gamma A /// hemoglobin, gamma A /// hemoglobin, gamma G /// hemoglobin, gamma G	HBG1 /// HBG2		6810 // transport // inferred from electronic annotation /// 15671 // oxygen transport // inferred from electronic annotation
204850_s_at	NM_000555	doublecortex; lissencephaly, X-linked (doublecortin)	DCX	1641	7242 // intracellular signaling cascade // inferred from electronic annotation /// 7417 // central nervous system development // traceable author statement /// 30154 // cell differentiation // inferred from electronic annotation /// 7275 // development // inferred from electronic annotation /// 7399 // nervous system development // inferred from electronic annotation /// 7399 // nervous system de…
204851_s_at	AF040254	doublecortex; lissencephaly, X-linked (doublecortin)	DCX	1641	7242 // intracellular signaling cascade // inferred from electronic annotation /// 7417 // central nervous system development // traceable author statement /// 30154 // cell differentiation // inferred from electronic annotation /// 7275 // development // inferred from electronic annotation /// 7399 // nervous system development // inferred from electronic annotation /// 7399 // nervous system de…
204854_at	NM_014262	leprecan-like 2	LEPREL2	10536	19538 // protein metabolism // inferred from electronic annotation
204870_s_at	NM_002594	proprotein convertase subtilisin/kexin type 2	PCSK2	5126	6508 // proteolysis // inferred from electronic annotation /// 6508 // proteolysis // traceable author statement /// 7267 // cell-cell signaling // traceable author statement
204879_at	NM_006474	podoplanin	PDPN	10630	1946 // lymphangiogenesis // inferred from sequence or structural similarity /// 6833 // water transport // inferred from sequence or structural similarity /// 6865 // amino acid transport // inferred from sequence or structural similarity /// 7275 // development // inferred from electronic annotation /// 8360 // regulation of cell shape // inferred from electronic annotation /// 15884 // folic a…
204882_at	NM_014882	Rho GTPase activating protein 25	ARHGAP25	9938	7165 // signal transduction // inferred from electronic annotation
204897_at	AA897516	prostaglandin E receptor 4 (subtype EP4)	PTGER4	5734	6955 // immune response // traceable author statement /// 7165 // signal transduction // inferred from electronic annotation /// 7186 // G-protein coupled receptor protein signaling pathway // inferred from electronic annotation /// 7188 // G-protein signaling, coupled to cAMP nucleotide second messenger // traceable author statement
204913_s_at	AI360875	SRY (sex determining region Y)-box 11	SOX11	6664	6350 // transcription // inferred from electronic annotation /// 6355 // regulation of transcription, DNA-dependent // inferred from electronic annotation /// 7399 // nervous system development // traceable author statement
204914_s_at	AW157202	SRY (sex determining region Y)-box 11	SOX11	6664	6350 // transcription // inferred from electronic annotation /// 6355 // regulation of transcription, DNA-dependent // inferred from electronic annotation /// 7399 // nervous system development // traceable author statement
204915_s_at	AB028641	SRY (sex determining region Y)-box 11	SOX11	6664	6350 // transcription // inferred from electronic annotation /// 6355 // regulation of transcription, DNA-dependent // inferred from electronic annotation /// 7399 // nervous system development // traceable author statement
204929_s_at	NM_006634	vesicle-associated membrane protein 5 (myobrevin)	VAMP5	10791	7519 // striated muscle development // inferred from electronic annotation /// 16192 // vesicle-mediated transport // inferred from electronic annotation /// 30154 // cell differentiation // inferred from electronic annotation /// 7275 // development // inferred from electronic annotation /// 7517 // muscle development // traceable author statement
204933_s_at	NM_002546	tumor necrosis factor receptor superfamily, member 11b (osteoprotegerin)	TNFRSF11B	4982	1501 // skeletal development // traceable author statement /// 6915 // apoptosis // inferred from electronic annotation /// 7165 // signal transduction // traceable author statement /// 7165 // signal transduction // inferred from electronic annotation
204940_at	NM_002667	phospholamban	PLN	5350	6816 // calcium ion transport // inferred from electronic annotation /// 6936 // muscle contraction // not recorded /// 8015 // circulation // non-traceable author statement /// 6816 // calcium ion transport // not recorded
204944_at	NM_002841	protein tyrosine phosphatase, receptor type, G	PTPRG	5793	6470 // protein amino acid dephosphorylation // inferred from electronic annotation /// 6730 // one-carbon compound metabolism // inferred from electronic annotation /// 7169 // transmembrane receptor protein tyrosine kinase signaling pathway // traceable author statement /// 6470 // protein amino acid dephosphorylation // not recorded
204951_at	NM_004310	ras homolog gene family, member H	RHOH	399	7264 // small GTPase mediated signal transduction // inferred from electronic annotation /// 30217 // T cell differentiation // non-traceable author statement /// 43124 // negative regulation of I-kappaB kinase/NF-kappaB cascade // inferred from direct assay /// 45449 // regulation of transcription // non-traceable author statement
204955_at	NM_006307	sushi-repeat-containing protein, X-linked	SRPX	8406	7155 // cell adhesion // inferred from electronic annotation
204963_at	AL136756	sarcospan (Kras oncogene-associated gene)	SSPN	8082	6936 // muscle contraction // traceable author statement /// 7155 // cell adhesion // traceable author statement
204964_s_at	NM_005086	sarcospan (Kras oncogene-associated gene)	SSPN	8082	6936 // muscle contraction // traceable author statement /// 7155 // cell adhesion // traceable author statement
204972_at	NM_016817	2'-5'-oligoadenylate synthetase 2, 69/71kDa	OAS2	4939	6139 // nucleobase, nucleoside, nucleotide and nucleic acid metabolism // traceable author statement /// 6955 // immune response // inferred from electronic annotation
204984_at	NM_001448	glypican 4	GPC4	2239	8283 // cell proliferation // traceable author statement /// 9653 // morphogenesis // traceable author statement
205000_at	NM_004660	DEAD (Asp-Glu-Ala-Asp) box polypeptide 3, Y-linked	DDX3Y	8653	---
205001_s_at	AF000985	DEAD (Asp-Glu-Ala-Asp) box polypeptide 3, Y-linked	DDX3Y	8653	---
205029_s_at	NM_001446	fatty acid binding protein 7, brain	FABP7	2173	6631 // fatty acid metabolism // not recorded /// 6810 // transport // inferred from electronic annotation /// 7399 // nervous system development // traceable author statement /// 8285 // negative regulation of cell proliferation // traceable author statement
205031_at	NM_001406	ephrin-B3	EFNB3	1949	7267 // cell-cell signaling // traceable author statement /// 7399 // nervous system development // traceable author statement /// 30154 // cell differentiation // inferred from electronic annotation /// 7275 // development // inferred from electronic annotation /// 7399 // nervous system development // inferred from electronic annotation
205038_at	BG540504	Zinc finger protein, subfamily 1A, 1 (Ikaros)	ZNFN1A1	10320	6350 // transcription // inferred from electronic annotation /// 6355 // regulation of transcription, DNA-dependent // inferred from electronic annotation /// 7498 // mesoderm development // traceable author statement
205051_s_at	NM_000222	v-kit Hardy-Zuckerman 4 feline sarcoma viral oncogene homolog	KIT	3815	6468 // protein amino acid phosphorylation // inferred from electronic annotation /// 6470 // protein amino acid dephosphorylation // not recorded /// 7165 // signal transduction // traceable author statement /// 7169 // transmembrane receptor protein tyrosine kinase signaling pathway // inferred from electronic annotation
205066_s_at	NM_006208	ectonucleotide pyrophosphatase/phosphodiesterase 1	ENPP1	5167	6091 // generation of precursor metabolites and energy // traceable author statement /// 6796 // phosphate metabolism // traceable author statement /// 7584 // response to nutrient // traceable author statement /// 9117 // nucleotide metabolism // inferred from electronic annotation
205081_at	NM_001311	cysteine-rich protein 1 (intestinal) /// galactokinase 2	CRIP1 /// GALK2		8283 // cell proliferation // traceable author statement /// 19735 // antimicrobial humoral response (sensu Vertebrata) // traceable author statement /// 6012 // galactose metabolism // inferred from electronic annotation /// 8152 // metabolism // inferred from electronic annotation /// 46835 // carbohydrate phosphorylation // inferred from electronic annotation /// 16310 // phosphorylation // in…
205110_s_at	NM_004114	fibroblast growth factor 13	FGF13	2258	7165 // signal transduction // traceable author statement /// 7267 // cell-cell signaling // traceable author statement /// 7399 // nervous system development // traceable author statement
205113_at	NM_005382	neurofilament 3 (150kDa medium)	NEF3	4741	---
205123_s_at	NM_003692	transmembrane protein with EGF-like and two follistatin-like domains 1	TMEFF1	8577	---
205149_s_at	NM_001830	chloride channel 4	CLCN4	1183	6811 // ion transport // inferred from electronic annotation /// 6821 // chloride transport // inferred from direct assay /// 6810 // transport // inferred from electronic annotation /// 6821 // chloride transport // inferred from electronic annotation /// 6810 // transport // traceable author statement
205150_s_at	AV724192	KIAA0644 gene product	KIAA0644	9865	---
205151_s_at	NM_014817	KIAA0644 gene product	KIAA0644	9865	---
205158_at	NM_002937	ribonuclease, RNase A family, 4	RNASE4	6038	6379 // mRNA cleavage // non-traceable author statement /// 1525 // angiogenesis // inferred from mutant phenotype /// 7046 // ribosome biogenesis // inferred from mutant phenotype /// 7202 // phospholipase C activation // inferred from mutant phenotype /// 9303 // rRNA transcription // inferred from mutant phenotype /// 43006 // calcium-dependent phospholipase A2 activation // inferred from muta…
205161_s_at	NM_003847	peroxisomal biogenesis factor 11A	PEX11A	8800	7165 // signal transduction // traceable author statement /// 16559 // peroxisome fission // inferred from electronic annotation /// 7031 // peroxisome organization and biogenesis // traceable author statement
205165_at	NM_001407	cadherin, EGF LAG seven-pass G-type receptor 3 (flamingo homolog, Drosophila)	CELSR3	1951	7156 // homophilic cell adhesion // inferred from electronic annotation /// 7165 // signal transduction // inferred from electronic annotation /// 7218 // neuropeptide signaling pathway // inferred from electronic annotation /// 7275 // development // inferred from electronic annotation /// 6810 // transport // inferred from electronic annotation /// 8272 // sulfate transport // inferred from ele…
205168_at	NM_006182	discoidin domain receptor family, member 2	DDR2	4921	6468 // protein amino acid phosphorylation // inferred from electronic annotation /// 7155 // cell adhesion // inferred from electronic annotation /// 7155 // cell adhesion // traceable author statement /// 7165 // signal transduction // traceable author statement /// 7169 // transmembrane receptor protein tyrosine kinase signaling pathway // inferred from electronic annotation
205174_s_at	NM_012413	glutaminyl-peptide cyclotransferase (glutaminyl cyclase)	QPCT	25797	6464 // protein modification // traceable author statement /// 6508 // proteolysis // inferred from electronic annotation
205184_at	NM_004485	guanine nucleotide binding protein (G protein), gamma 4	GNG4	2786	7165 // signal transduction // inferred from electronic annotation /// 8277 // regulation of G-protein coupled receptor protein signaling pathway // traceable author statement /// 7186 // G-protein coupled receptor protein signaling pathway // inferred from electronic annotation
205186_at	NM_003462	dynein, axonemal, light intermediate polypeptide 1	DNALI1	7802	6928 // cell motility // traceable author statement /// 7338 // fertilization (sensu Metazoa) // traceable author statement
205206_at	NM_000216	Kallmann syndrome 1 sequence	KAL1	3730	6928 // cell motility // traceable author statement /// 6935 // chemotaxis // traceable author statement /// 7155 // cell adhesion // traceable author statement /// 7411 // axon guidance // traceable author statement /// 7155 // cell adhesion // inferred from electronic annotation
205220_at	NM_006018	G protein-coupled receptor 109B /// G protein-coupled receptor 109B	GPR109B	8843	7165 // signal transduction // inferred from electronic annotation /// 7186 // G-protein coupled receptor protein signaling pathway // traceable author statement /// 7186 // G-protein coupled receptor protein signaling pathway // inferred from electronic annotation
205229_s_at	AA669336	coagulation factor C homolog, cochlin (Limulus polyphemus)	COCH	1690	7605 // sensory perception of sound // traceable author statement /// 7605 // sensory perception of sound // inferred from electronic annotation
205249_at	NM_000399	early growth response 2 (Krox-20 homolog, Drosophila)	EGR2	1959	6350 // transcription // inferred from electronic annotation /// 6355 // regulation of transcription, DNA-dependent // inferred from electronic annotation /// 7420 // brain development // traceable author statement /// 7422 // peripheral nervous system development // traceable author statement /// 7638 // mechanosensory behavior // inferred from electronic annotation
205257_s_at	NM_001635	amphiphysin (Stiff-Man syndrome with breast cancer 128kDa autoantigen)	AMPH	273	6897 // endocytosis // traceable author statement /// 7268 // synaptic transmission // traceable author statement
205259_at	NM_000901	nuclear receptor subfamily 3, group C, member 2	NR3C2	4306	6350 // transcription // inferred from electronic annotation /// 6355 // regulation of transcription, DNA-dependent // inferred from electronic annotation /// 6883 // sodium ion homeostasis // not recorded /// 7165 // signal transduction // traceable author statement /// 7588 // excretion // not recorded
205268_s_at	NM_017488	adducin 2 (beta)	ADD2	119	---
205270_s_at	NM_005565	lymphocyte cytosolic protein 2 (SH2 domain containing leukocyte protein of 76kDa)	LCP2	3937	6955 // immune response // traceable author statement /// 7169 // transmembrane receptor protein tyrosine kinase signaling pathway // traceable author statement /// 7242 // intracellular signaling cascade // inferred from electronic annotation
205278_at	NM_000817	glutamate decarboxylase 1 (brain, 67kDa)	GAD1	2571	6540 // glutamate decarboxylation to succinate // traceable author statement /// 7268 // synaptic transmission // traceable author statement /// 18352 // protein-pyridoxal-5-phosphate linkage // traceable author statement /// 19752 // carboxylic acid metabolism // inferred from electronic annotation /// 42136 // neurotransmitter biosynthesis // inferred from electronic annotation /// 6538 // glut…
205286_at	U85658	transcription factor AP-2 gamma (activating enhancer binding protein 2 gamma)	TFAP2C	7022	6350 // transcription // inferred from electronic annotation /// 6357 // regulation of transcription from RNA polymerase II promoter // traceable author statement /// 7267 // cell-cell signaling // traceable author statement /// 6355 // regulation of transcription, DNA-dependent // inferred from electronic annotation
205289_at	AA583044	bone morphogenetic protein 2	BMP2	650	1503 // ossification // inferred from electronic annotation /// 1837 // epithelial to mesenchymal transition // inferred from direct assay /// 7267 // cell-cell signaling // traceable author statement /// 35051 // cardiac cell differentiation // inferred from direct assay /// 40007 // growth // inferred from electronic annotation /// 51216 // cartilage development // inferred from electronic anno…
205290_s_at	NM_001200	bone morphogenetic protein 2	BMP2	650	1503 // ossification // inferred from electronic annotation /// 1837 // epithelial to mesenchymal transition // inferred from direct assay /// 7267 // cell-cell signaling // traceable author statement /// 35051 // cardiac cell differentiation // inferred from direct assay /// 40007 // growth // inferred from electronic annotation /// 51216 // cartilage development // inferred from electronic anno…
205293_x_at	AB017120	BAI1-associated protein 2	BAIAP2	10458	---
205303_at	BF514158	potassium inwardly-rectifying channel, subfamily J, member 8	KCNJ8	3764	6811 // ion transport // inferred from electronic annotation /// 6813 // potassium ion transport // traceable author statement /// 6810 // transport // inferred from electronic annotation /// 6813 // potassium ion transport // inferred from electronic annotation
205304_s_at	NM_004982	potassium inwardly-rectifying channel, subfamily J, member 8	KCNJ8	3764	6811 // ion transport // inferred from electronic annotation /// 6813 // potassium ion transport // traceable author statement /// 6810 // transport // inferred from electronic annotation /// 6813 // potassium ion transport // inferred from electronic annotation
205311_at	NM_000790	dopa decarboxylase (aromatic L-amino acid decarboxylase)	DDC	1644	6519 // amino acid and derivative metabolism // inferred from electronic annotation /// 19752 // carboxylic acid metabolism // inferred from electronic annotation /// 42423 // catecholamine biosynthesis // inferred from electronic annotation
205312_at	NM_003120	spleen focus forming virus (SFFV) proviral integration oncogene spi1	SPI1	6688	122 // negative regulation of transcription from RNA polymerase II promoter // traceable author statement /// 6350 // transcription // inferred from electronic annotation /// 6355 // regulation of transcription, DNA-dependent // inferred from electronic annotation
205330_at	NM_002430	meningioma (disrupted in balanced translocation) 1	MN1	4330	7049 // cell cycle // inferred from electronic annotation /// 45786 // negative regulation of progression through cell cycle // inferred from electronic annotation
205334_at	NM_006271	S100 calcium binding protein A1	S100A1	6271	7242 // intracellular signaling cascade // non-traceable author statement /// 8016 // regulation of heart contraction // non-traceable author statement
205350_at	NM_004378	cellular retinoic acid binding protein 1	CRABP1	1381	6810 // transport // inferred from electronic annotation /// 7165 // signal transduction // traceable author statement /// 7275 // development // traceable author statement
205373_at	NM_004389	catenin (cadherin-associated protein), alpha 2	CTNNA2	1496	7155 // cell adhesion // inferred from electronic annotation /// 7155 // cell adhesion // non-traceable author statement
205380_at	NM_002614	PDZ domain containing 1	PDZK1	5174	15893 // drug transport // non-traceable author statement
205384_at	NM_005031	FXYD domain containing ion transport regulator 1 (phospholemman)	FXYD1	5348	6811 // ion transport // inferred from electronic annotation /// 6821 // chloride transport // traceable author statement /// 6936 // muscle contraction // traceable author statement /// 6810 // transport // inferred from electronic annotation
205388_at	NM_003279	troponin C type 2 (fast)	TNNC2	7125	6937 // regulation of muscle contraction // traceable author statement
205397_x_at	U76622	SMAD, mothers against DPP homolog 3 (Drosophila)	SMAD3	4088	6350 // transcription // inferred from electronic annotation /// 6355 // regulation of transcription, DNA-dependent // inferred from electronic annotation /// 6366 // transcription from RNA polymerase II promoter // traceable author statement /// 7179 // transforming growth factor beta receptor signaling pathway // traceable author statement /// 6366 // transcription from RNA polymerase II promot…
205399_at	NM_004734	doublecortin and CaM kinase-like 1	DCAMKL1	9201	6468 // protein amino acid phosphorylation // traceable author statement /// 7242 // intracellular signaling cascade // inferred from electronic annotation /// 7417 // central nervous system development // traceable author statement /// 16197 // endosome transport // non-traceable author statement /// 30154 // cell differentiation // inferred from electronic annotation /// 6468 // protein amino a…
205405_at	NM_003966	sema domain, seven thrombospondin repeats (type 1 and type 1-like), transmembrane domain (TM) and short cytoplasmic domain, (semaphorin) 5A	SEMA5A	9037	7155 // cell adhesion // traceable author statement /// 7267 // cell-cell signaling // traceable author statement /// 7399 // nervous system development // traceable author statement /// 30154 // cell differentiation // inferred from electronic annotation /// 7275 // development // inferred from electronic annotation /// 7399 // nervous system development // inferred from electronic annotation
205413_at	NM_001584	metallophosphoesterase domain containing 2	MPPED2	744	7399 // nervous system development // traceable author statement
205418_at	NM_002005	feline sarcoma oncogene	FES	2242	6468 // protein amino acid phosphorylation // inferred from electronic annotation /// 6468 // protein amino acid phosphorylation // traceable author statement /// 7242 // intracellular signaling cascade // inferred from electronic annotation /// 7275 // development // traceable author statement /// 8283 // cell proliferation // traceable author statement
205430_at	AL133386	bone morphogenetic protein 5	BMP5	653	1503 // ossification // inferred from electronic annotation /// 30154 // cell differentiation // inferred from electronic annotation /// 40007 // growth // inferred from electronic annotation /// 51216 // cartilage development // inferred from electronic annotation /// 7275 // development // inferred from electronic annotation /// 1501 // skeletal development // non-traceable author statement
205433_at	NM_000055	butyrylcholinesterase	BCHE	590	50783 // cocaine metabolism // traceable author statement
205439_at	NM_000854	glutathione S-transferase theta 2	GSTT2	2953	16055 // Wnt receptor signaling pathway // inferred from electronic annotation
205440_s_at	NM_000909	neuropeptide Y receptor Y1	NPY1R	4886	7165 // signal transduction // inferred from electronic annotation /// 7187 // G-protein signaling, coupled to cyclic nucleotide second messenger // traceable author statement /// 7193 // G-protein signaling, adenylate cyclase inhibiting pathway // traceable author statement /// 7218 // neuropeptide signaling pathway // inferred from electronic annotation /// 7631 // feeding behavior // not recor…
205442_at	NM_021647	microfibrillar-associated protein 3-like	MFAP3L	9848	---
205453_at	NM_002145	homeobox B2	HOXB2	3212	6355 // regulation of transcription, DNA-dependent // inferred from electronic annotation /// 6355 // regulation of transcription, DNA-dependent // non-traceable author statement /// 7275 // development // non-traceable author statement /// 7275 // development // traceable author statement /// 8015 // circulation // traceable author statement /// 6350 // transcription // inferred from electronic …
205463_s_at	NM_002607	platelet-derived growth factor alpha polypeptide	PDGFA	5154	74 // regulation of progression through cell cycle // inferred from electronic annotation /// 7166 // cell surface receptor linked signal transduction // traceable author statement /// 7267 // cell-cell signaling // traceable author statement /// 8283 // cell proliferation // traceable author statement /// 8284 // positive regulation of cell proliferation // inferred from direct assay /// 8283 //…
205466_s_at	NM_005114	heparan sulfate (glucosamine) 3-O-sulfotransferase 1	HS3ST1	9957	---
205471_s_at	AW772082	dachshund homolog 1 (Drosophila)	DACH1	1602	6350 // transcription // inferred from electronic annotation /// 6355 // regulation of transcription, DNA-dependent // inferred from electronic annotation /// 7275 // development // inferred from electronic annotation /// 7456 // eye development (sensu Endopterygota) // traceable author statement /// 6813 // potassium ion transport // inferred from electronic annotation /// 42309 // homoiothermy …
205472_s_at	NM_004392	dachshund homolog 1 (Drosophila)	DACH1	1602	6350 // transcription // inferred from electronic annotation /// 6355 // regulation of transcription, DNA-dependent // inferred from electronic annotation /// 7275 // development // inferred from electronic annotation /// 7456 // eye development (sensu Endopterygota) // traceable author statement /// 6813 // potassium ion transport // inferred from electronic annotation /// 42309 // homoiothermy …
205478_at	NM_006741	protein phosphatase 1, regulatory (inhibitor) subunit 1A	PPP1R1A	5502	5975 // carbohydrate metabolism // inferred from electronic annotation /// 5977 // glycogen metabolism // inferred from electronic annotation /// 7165 // signal transduction // inferred from electronic annotation
205479_s_at	NM_002658	plasminogen activator, urokinase	PLAU	5328	6508 // proteolysis // inferred from electronic annotation /// 6508 // proteolysis // traceable author statement /// 6935 // chemotaxis // traceable author statement /// 7165 // signal transduction // traceable author statement /// 7596 // blood coagulation // inferred from electronic annotation /// 42730 // fibrinolysis // inferred from electronic annotation /// 7596 // blood coagulation // not …
205485_at	NM_000540	ryanodine receptor 1 (skeletal)	RYR1	6261	6811 // ion transport // inferred from electronic annotation /// 6816 // calcium ion transport // traceable author statement /// 6874 // calcium ion homeostasis // inferred from electronic annotation /// 6936 // muscle contraction // traceable author statement /// 6816 // calcium ion transport // inferred from direct assay /// 10033 // response to organic substance // inferred from direct assay /…
205493_s_at	NM_006426	dihydropyrimidinase-like 4	DPYSL4	10570	7399 // nervous system development // traceable author statement
205496_at	NM_014702	KIAA0408	KIAA0408	9729	---
205498_at	NM_000163	growth hormone receptor	GHR	2690	1501 // skeletal development // traceable author statement /// 6897 // endocytosis // inferred from electronic annotation /// 40007 // growth // traceable author statement
205501_at	AI143879	CDNA FLJ25677 fis, clone TST04054	---		---
205522_at	NM_014621	homeobox D4	HOXD4	3233	6355 // regulation of transcription, DNA-dependent // non-traceable author statement /// 7275 // development // non-traceable author statement /// 6350 // transcription // inferred from electronic annotation /// 6355 // regulation of transcription, DNA-dependent // inferred from electronic annotation /// 7275 // development // inferred from electronic annotation /// 45449 // regulation of transcr…
205523_at	U43328	hyaluronan and proteoglycan link protein 1	HAPLN1	1404	7155 // cell adhesion // inferred from electronic annotation
205528_s_at	X79990	runt-related transcription factor 1; translocated to, 1 (cyclin D-related)	RUNX1T1	862	6091 // generation of precursor metabolites and energy // traceable author statement /// 6350 // transcription // inferred from electronic annotation /// 6355 // regulation of transcription, DNA-dependent // inferred from electronic annotation /// 30854 // positive regulation of granulocyte differentiation // inferred from mutant phenotype /// 30097 // hemopoiesis // inferred from sequence or str…
205529_s_at	NM_004349	runt-related transcription factor 1; translocated to, 1 (cyclin D-related)	RUNX1T1	862	6091 // generation of precursor metabolites and energy // traceable author statement /// 6350 // transcription // inferred from electronic annotation /// 6355 // regulation of transcription, DNA-dependent // inferred from electronic annotation
205534_at	NM_002589	BH-protocadherin (brain-heart)	PCDH7	5099	7155 // cell adhesion // inferred from electronic annotation /// 7156 // homophilic cell adhesion // inferred from electronic annotation
205535_s_at	NM_002589	BH-protocadherin (brain-heart)	PCDH7	5099	7155 // cell adhesion // inferred from electronic annotation /// 7156 // homophilic cell adhesion // inferred from electronic annotation
205555_s_at	D31771	msh homeobox homolog 2 (Drosophila)	MSX2	4488	1501 // skeletal development // traceable author statement /// 6355 // regulation of transcription, DNA-dependent // inferred from electronic annotation /// 7275 // development // inferred from electronic annotation /// 45449 // regulation of transcription // inferred from electronic annotation
205559_s_at	NM_006200	proprotein convertase subtilisin/kexin type 5	PCSK5	5125	6508 // proteolysis // inferred from electronic annotation /// 6508 // proteolysis // traceable author statement /// 7267 // cell-cell signaling // traceable author statement
205573_s_at	NM_015976	sorting nexin 7	SNX7	51375	7242 // intracellular signaling cascade // inferred from electronic annotation /// 15031 // protein transport // inferred from electronic annotation /// 6810 // transport // inferred from electronic annotation
205578_at	NM_004560	receptor tyrosine kinase-like orphan receptor 2	ROR2	4920	6468 // protein amino acid phosphorylation // inferred from electronic annotation /// 7165 // signal transduction // traceable author statement /// 7275 // development // traceable author statement /// 7275 // development // inferred from electronic annotation
205579_at	NM_000861	histamine receptor H1	HRH1	3269	6954 // inflammatory response // traceable author statement /// 7165 // signal transduction // inferred from electronic annotation /// 7200 // G-protein signaling, coupled to IP3 second messenger (phospholipase C activating) // traceable author statement /// 7186 // G-protein coupled receptor protein signaling pathway // inferred from electronic annotation /// 7186 // G-protein coupled receptor p…
205590_at	NM_005739	RAS guanyl releasing protein 1 (calcium and DAG-regulated)	RASGRP1	10125	7265 // Ras protein signal transduction // traceable author statement /// 51056 // regulation of small GTPase mediated signal transduction // inferred from electronic annotation /// 7242 // intracellular signaling cascade // inferred from electronic annotation /// 7264 // small GTPase mediated signal transduction // inferred from electronic annotation /// 7165 // signal transduction // traceable …
205591_at	NM_006334	olfactomedin 1	OLFM1	10439	7275 // development // inferred from electronic annotation /// 7399 // nervous system development // traceable author statement
205613_at	NM_016524	synaptotagmin XVII	SYT17	51760	6810 // transport // inferred from electronic annotation
205619_s_at	NM_004527	mesenchyme homeobox 1	MEOX1	4222	6355 // regulation of transcription, DNA-dependent // inferred from electronic annotation /// 7275 // development // traceable author statement /// 7275 // development // inferred from electronic annotation /// 45449 // regulation of transcription // inferred from electronic annotation
205637_s_at	NM_003027	SH3-domain GRB2-like 3	SH3GL3	6457	7165 // signal transduction // traceable author statement /// 7417 // central nervous system development // traceable author statement
205638_at	NM_001704	brain-specific angiogenesis inhibitor 3	BAI3	577	7165 // signal transduction // inferred from electronic annotation /// 7218 // neuropeptide signaling pathway // inferred from electronic annotation /// 7186 // G-protein coupled receptor protein signaling pathway // inferred from electronic annotation /// 7186 // G-protein coupled receptor protein signaling pathway // traceable author statement
205646_s_at	NM_000280	paired box gene 6 (aniridia, keratitis)	PAX6	5080	1654 // eye development // traceable author statement /// 6350 // transcription // inferred from electronic annotation /// 6355 // regulation of transcription, DNA-dependent // inferred from electronic annotation /// 7275 // development // inferred from electronic annotation /// 7417 // central nervous system development // traceable author statement /// 7601 // visual perception // traceable aut…
205656_at	NM_014459	protocadherin 17	PCDH17	27253	7155 // cell adhesion // inferred from electronic annotation /// 7156 // homophilic cell adhesion // inferred from electronic annotation
205668_at	NM_002349	lymphocyte antigen 75	LY75	4065	6897 // endocytosis // inferred from electronic annotation /// 6954 // inflammatory response // traceable author statement /// 6955 // immune response // traceable author statement
205678_at	NM_004644	adaptor-related protein complex 3, beta 2 subunit	AP3B2	8120	6892 // post-Golgi vesicle-mediated transport // traceable author statement /// 6897 // endocytosis // inferred from electronic annotation /// 15031 // protein transport // inferred from electronic annotation /// 6810 // transport // inferred from electronic annotation
205691_at	NM_004209	synaptogyrin 3	SYNGR3	9143	---
205709_s_at	NM_001263	CDP-diacylglycerol synthase (phosphatidate cytidylyltransferase) 1	CDS1	1040	6629 // lipid metabolism // traceable author statement /// 7165 // signal transduction // traceable author statement /// 7601 // visual perception // traceable author statement /// 8654 // phospholipid biosynthesis // inferred from electronic annotation
205712_at	NM_002839	protein tyrosine phosphatase, receptor type, D	PTPRD	5789	6470 // protein amino acid dephosphorylation // traceable author statement /// 6796 // phosphate metabolism // non-traceable author statement /// 7185 // transmembrane receptor protein tyrosine phosphatase signaling pathway // traceable author statement /// 6470 // protein amino acid dephosphorylation // inferred from electronic annotation
205721_at	U97145	GDNF family receptor alpha 2	GFRA2	2675	7169 // transmembrane receptor protein tyrosine kinase signaling pathway // traceable author statement
205728_at	AL022718	CDNA clone IMAGE:4811759	---		---
205751_at	NM_003026	SH3-domain GRB2-like 2	SH3GL2	6456	7165 // signal transduction // traceable author statement /// 7417 // central nervous system development // traceable author statement
205789_at	NM_001766	CD1d molecule /// CD1d molecule	CD1D	912	16045 // detection of bacteria // traceable author statement /// 45058 // T cell selection // traceable author statement /// 45089 // positive regulation of innate immune response // traceable author statement /// 48004 // antigen presentation, endogenous peptide antigen // non-traceable author statement /// 48006 // antigen presentation, endogenous lipid antigen // inferred from direct assay
205798_at	NM_002185	interleukin 7 receptor /// interleukin 7 receptor	IL7R	3575	18 // regulation of DNA recombination // traceable author statement /// 6955 // immune response // traceable author statement /// 7166 // cell surface receptor linked signal transduction // traceable author statement /// 19735 // antimicrobial humoral response (sensu Vertebrata) // traceable author statement /// 7165 // signal transduction // traceable author statement
205816_at	NM_002214	integrin, beta 8	ITGB8	3696	7155 // cell adhesion // inferred from electronic annotation /// 7155 // cell adhesion // traceable author statement /// 7160 // cell-matrix adhesion // inferred from electronic annotation /// 7229 // integrin-mediated signaling pathway // inferred from electronic annotation /// 7275 // development // inferred from electronic annotation
205817_at	NM_005982	sine oculis homeobox homolog 1 (Drosophila)	SIX1	6495	6355 // regulation of transcription, DNA-dependent // inferred from electronic annotation /// 7275 // development // inferred from electronic annotation /// 7517 // muscle development // traceable author statement /// 45449 // regulation of transcription // inferred from electronic annotation
205825_at	NM_000439	proprotein convertase subtilisin/kexin type 1	PCSK1	5122	6508 // proteolysis // traceable author statement /// 7267 // cell-cell signaling // traceable author statement /// 8152 // metabolism // traceable author statement /// 6508 // proteolysis // inferred from electronic annotation
205830_at	NM_004362	calmegin	CLGN	1047	6457 // protein folding // inferred from electronic annotation /// 7338 // fertilization (sensu Metazoa) // traceable author statement
205848_at	NM_005256	growth arrest-specific 2	GAS2	2620	6915 // apoptosis // traceable author statement /// 7049 // cell cycle // inferred from electronic annotation /// 7050 // cell cycle arrest // inferred from electronic annotation /// 8360 // regulation of cell shape // inferred from electronic annotation /// 6915 // apoptosis // inferred from electronic annotation
205850_s_at	NM_000814	gamma-aminobutyric acid (GABA) A receptor, beta 3	GABRB3	2562	6811 // ion transport // inferred from electronic annotation /// 7165 // signal transduction // traceable author statement /// 6810 // transport // inferred from electronic annotation /// 6810 // transport // traceable author statement
205858_at	NM_002507	nerve growth factor receptor (TNFR superfamily, member 16)	NGFR	4804	6915 // apoptosis // inferred from electronic annotation /// 7165 // signal transduction // inferred from electronic annotation /// 7399 // nervous system development // inferred from electronic annotation /// 30154 // cell differentiation // inferred from electronic annotation /// 7275 // development // inferred from electronic annotation
205862_at	NM_014668	GREB1 protein	GREB1	9687	---
205872_x_at	NM_022359	phosphodiesterase 4D interacting protein (myomegalin)	PDE4DIP	9659	6412 // protein biosynthesis // inferred from electronic annotation /// 7010 // cytoskeleton organization and biogenesis // inferred from electronic annotation /// 30036 // actin cytoskeleton organization and biogenesis // inferred from electronic annotation
205880_at	NM_002742	protein kinase D1	PRKD1	5587	6468 // protein amino acid phosphorylation // traceable author statement /// 7242 // intracellular signaling cascade // inferred from electronic annotation /// 8283 // cell proliferation // traceable author statement /// 6468 // protein amino acid phosphorylation // inferred from electronic annotation /// 7165 // signal transduction // traceable author statement
205884_at	NM_000885	integrin, alpha 4 (antigen CD49D, alpha 4 subunit of VLA-4 receptor)	ITGA4	3676	7155 // cell adhesion // inferred from electronic annotation /// 7229 // integrin-mediated signaling pathway // inferred from electronic annotation
205885_s_at	L12002	integrin, alpha 4 (antigen CD49D, alpha 4 subunit of VLA-4 receptor)	ITGA4	3676	7155 // cell adhesion // inferred from electronic annotation /// 7229 // integrin-mediated signaling pathway // inferred from electronic annotation
205899_at	NM_003914	cyclin A1	CCNA1	8900	79 // regulation of cyclin-dependent protein kinase activity // not recorded /// 7049 // cell cycle // inferred from electronic annotation /// 7067 // mitosis // inferred from electronic annotation /// 7126 // meiosis // inferred from electronic annotation /// 7141 // male meiosis I // traceable author statement /// 7283 // spermatogenesis // traceable author statement /// 51301 // cell division …
205901_at	NM_006228	prepronociceptin	PNOC	5368	7165 // signal transduction // traceable author statement /// 7218 // neuropeptide signaling pathway // inferred from electronic annotation /// 7268 // synaptic transmission // inferred from electronic annotation /// 7600 // sensory perception // traceable author statement
205910_s_at	NM_001807	carboxyl ester lipase (bile salt-stimulated lipase)	CEL	1056	6629 // lipid metabolism // inferred from sequence or structural similarity /// 6641 // triacylglycerol metabolism // Unknown /// 6641 // triacylglycerol metabolism // inferred from sequence or structural similarity /// 6707 // cholesterol catabolism // inferred from direct assay /// 6707 // cholesterol catabolism // inferred from sequence or structural similarity /// 6707 // cholesterol cataboli…
205923_at	NM_005045	reelin	RELN	5649	7155 // cell adhesion // inferred from electronic annotation /// 7275 // development // inferred from electronic annotation
205945_at	NM_000565	interleukin 6 receptor /// interleukin 6 receptor	IL6R	3570	6955 // immune response // traceable author statement /// 7166 // cell surface receptor linked signal transduction // traceable author statement /// 7275 // development // traceable author statement /// 8283 // cell proliferation // traceable author statement
205952_at	NM_002246	potassium channel, subfamily K, member 3	KCNK3	3777	6811 // ion transport // inferred from electronic annotation /// 6813 // potassium ion transport // traceable author statement /// 7268 // synaptic transmission // traceable author statement /// 6810 // transport // inferred from electronic annotation /// 6813 // potassium ion transport // inferred from electronic annotation
205968_at	NM_002252	potassium voltage-gated channel, delayed-rectifier, subfamily S, member 3	KCNS3	3790	6811 // ion transport // inferred from electronic annotation /// 6813 // potassium ion transport // inferred from electronic annotation /// 6813 // potassium ion transport // traceable author statement /// 6810 // transport // inferred from electronic annotation
205990_s_at	NM_003392	wingless-type MMTV integration site family, member 5A	WNT5A	7474	7165 // signal transduction // traceable author statement /// 7223 // frizzled-2 signaling pathway // inferred from electronic annotation /// 7267 // cell-cell signaling // traceable author statement /// 9653 // morphogenesis // traceable author statement /// 7275 // development // inferred from electronic annotation /// 16055 // Wnt receptor signaling pathway // inferred from electronic annotati…
205992_s_at	NM_000585	interleukin 15	IL15	3600	6955 // immune response // traceable author statement /// 7165 // signal transduction // traceable author statement /// 7267 // cell-cell signaling // traceable author statement /// 8284 // positive regulation of cell proliferation // traceable author statement /// 6955 // immune response // inferred from electronic annotation
206001_at	NM_000905	neuropeptide Y	NPY	4852	6816 // calcium ion transport // traceable author statement /// 6928 // cell motility // traceable author statement /// 7187 // G-protein signaling, coupled to cyclic nucleotide second messenger // traceable author statement /// 7218 // neuropeptide signaling pathway // inferred from electronic annotation /// 7268 // synaptic transmission // traceable author statement /// 7586 // digestion // non…
206002_at	NM_005756	G protein-coupled receptor 64	GPR64	10149	7165 // signal transduction // inferred from electronic annotation /// 7218 // neuropeptide signaling pathway // inferred from electronic annotation /// 7283 // spermatogenesis // traceable author statement /// 7186 // G-protein coupled receptor protein signaling pathway // inferred from electronic annotation /// 7186 // G-protein coupled receptor protein signaling pathway // traceable author sta…
206011_at	AI719655	caspase 1, apoptosis-related cysteine peptidase (interleukin 1, beta, convertase)	CASP1	834	6508 // proteolysis // inferred from direct assay /// 6508 // proteolysis // inferred from electronic annotation /// 7165 // signal transduction // traceable author statement /// 42981 // regulation of apoptosis // inferred from electronic annotation /// 43123 // positive regulation of I-kappaB kinase/NF-kappaB cascade // inferred from expression pattern /// 6508 // proteolysis // traceable autho…
206023_at	NM_006681	neuromedin U	NMU	10874	6940 // regulation of smooth muscle contraction // inferred from electronic annotation /// 6940 // regulation of smooth muscle contraction // traceable author statement /// 7165 // signal transduction // traceable author statement /// 7218 // neuropeptide signaling pathway // inferred from electronic annotation /// 7586 // digestion // traceable author statement /// 7186 // G-protein coupled rece…
206025_s_at	AW188198	tumor necrosis factor, alpha-induced protein 6	TNFAIP6	7130	6954 // inflammatory response // traceable author statement /// 7155 // cell adhesion // inferred from electronic annotation /// 7165 // signal transduction // traceable author statement /// 7267 // cell-cell signaling // traceable author statement
206045_s_at	NM_003787	nucleolar protein 4	NOL4	8715	---
206051_at	NM_021952	ELAV (embryonic lethal, abnormal vision, Drosophila)-like 4 (Hu antigen D)	ELAVL4	1996	6397 // mRNA processing // traceable author statement /// 6396 // RNA processing // traceable author statement
206060_s_at	NM_015967	protein tyrosine phosphatase, non-receptor type 22 (lymphoid)	PTPN22	26191	6470 // protein amino acid dephosphorylation // inferred from electronic annotation /// 6470 // protein amino acid dephosphorylation // traceable author statement /// 7165 // signal transduction // traceable author statement /// 7275 // development // not recorded
206067_s_at	NM_024426	Wilms tumor 1	WT1	7490	6350 // transcription // inferred from electronic annotation /// 6355 // regulation of transcription, DNA-dependent // inferred from electronic annotation /// 6355 // regulation of transcription, DNA-dependent // non-traceable author statement /// 7049 // cell cycle // inferred from electronic annotation /// 45786 // negative regulation of progression through cell cycle // inferred from electroni…
206070_s_at	AF213459	EPH receptor A3	EPHA3	2042	6468 // protein amino acid phosphorylation // inferred from electronic annotation /// 7165 // signal transduction // traceable author statement /// 7169 // transmembrane receptor protein tyrosine kinase signaling pathway // inferred from electronic annotation
206084_at	NM_002849	protein tyrosine phosphatase, receptor type, R	PTPRR	5801	1701 // embryonic development (sensu Mammalia) // inferred from expression pattern /// 6470 // protein amino acid dephosphorylation // traceable author statement /// 6470 // protein amino acid dephosphorylation // inferred from electronic annotation
206089_at	NM_006157	NEL-like 1 (chicken)	NELL1	4745	7155 // cell adhesion // inferred from electronic annotation /// 7399 // nervous system development // traceable author statement /// 8152 // metabolism // inferred from electronic annotation
206100_at	NM_001874	carboxypeptidase M	CPM	1368	6508 // proteolysis // inferred from electronic annotation /// 6725 // aromatic compound metabolism // inferred from electronic annotation /// 9653 // morphogenesis // traceable author statement
206101_at	NM_001393	extracellular matrix protein 2, female organ and adipocyte specific	ECM2	1842	7160 // cell-matrix adhesion // traceable author statement
206103_at	NM_005052	ras-related C3 botulinum toxin substrate 3 (rho family, small GTP binding protein Rac3)	RAC3	5881	7264 // small GTPase mediated signal transduction // inferred from electronic annotation /// 30031 // cell projection biogenesis // inferred from direct assay /// 30036 // actin cytoskeleton organization and biogenesis // inferred from direct assay
206104_at	NM_002202	ISL1 transcription factor, LIM/homeodomain, (islet-1)	ISL1	3670	6355 // regulation of transcription, DNA-dependent // inferred from electronic annotation /// 7275 // development // inferred from electronic annotation /// 45449 // regulation of transcription // inferred from electronic annotation
206114_at	NM_004438	EPH receptor A4	EPHA4	2043	6468 // protein amino acid phosphorylation // inferred from electronic annotation /// 7165 // signal transduction // traceable author statement /// 7169 // transmembrane receptor protein tyrosine kinase signaling pathway // inferred from electronic annotation
206117_at	NM_000366	tropomyosin 1 (alpha)	TPM1	7168	6928 // cell motility // traceable author statement /// 6937 // regulation of muscle contraction // traceable author statement /// 8016 // regulation of heart contraction // traceable author statement /// 6633 // fatty acid biosynthesis // inferred from electronic annotation
206135_at	NM_014682	suppression of tumorigenicity 18 (breast carcinoma) (zinc finger protein)	ST18	9705	6350 // transcription // inferred from electronic annotation /// 6355 // regulation of transcription, DNA-dependent // inferred from electronic annotation
206140_at	NM_004789	LIM homeobox 2	LHX2	9355	6355 // regulation of transcription, DNA-dependent // inferred from electronic annotation /// 6350 // transcription // inferred from electronic annotation /// 45449 // regulation of transcription // inferred from electronic annotation
206157_at	NM_002852	pentraxin-related gene, rapidly induced by IL-1 beta	PTX3	5806	6954 // inflammatory response // traceable author statement
206159_at	NM_004962	growth differentiation factor 10	GDF10	2662	1501 // skeletal development // traceable author statement /// 7179 // transforming growth factor beta receptor signaling pathway // traceable author statement
206163_at	NM_005584	mab-21-like 1 (C. elegans)	MAB21L1	4081	9653 // morphogenesis // traceable author statement
206167_s_at	NM_001174	Rho GTPase activating protein 6	ARHGAP6	395	7165 // signal transduction // inferred from electronic annotation /// 7266 // Rho protein signal transduction // non-traceable author statement /// 30041 // actin filament polymerization // non-traceable author statement /// 7266 // Rho protein signal transduction // traceable author statement
206172_at	NM_000640	interleukin 13 receptor, alpha 2	IL13RA2	3598	---
206189_at	NM_003728	unc-5 homolog C (C. elegans)	UNC5C	8633	6915 // apoptosis // inferred from electronic annotation /// 7165 // signal transduction // inferred from electronic annotation /// 7275 // development // inferred from electronic annotation /// 7411 // axon guidance // traceable author statement /// 7420 // brain development // traceable author statement
206196_s_at	NM_006695	RaP2 interacting protein 8	RPIP8	10900	7264 // small GTPase mediated signal transduction // traceable author statement
206198_s_at	L31792	carcinoembryonic antigen-related cell adhesion molecule 7	CEACAM7	1087	---
206201_s_at	NM_005924	mesenchyme homeobox 2	MEOX2	4223	6355 // regulation of transcription, DNA-dependent // inferred from electronic annotation /// 7275 // development // traceable author statement /// 8015 // circulation // traceable author statement /// 7275 // development // inferred from electronic annotation /// 45449 // regulation of transcription // inferred from electronic annotation
206204_at	NM_004490	growth factor receptor-bound protein 14	GRB14	2888	7242 // intracellular signaling cascade // inferred from electronic annotation /// 7165 // signal transduction // inferred from electronic annotation /// 7165 // signal transduction // traceable author statement
206219_s_at	NM_005428	vav 1 oncogene	VAV1	7409	7242 // intracellular signaling cascade // inferred from electronic annotation /// 35023 // regulation of Rho protein signal transduction // inferred from electronic annotation
206232_s_at	NM_004775	UDP-Gal:betaGlcNAc beta 1,4- galactosyltransferase, polypeptide 6	B4GALT6	9331	5975 // carbohydrate metabolism // inferred from electronic annotation
206243_at	NM_003256	TIMP metallopeptidase inhibitor 4	TIMP4	7079	---
206247_at	NM_005931	MHC class I polypeptide-related sequence B	MICB	4277	6950 // response to stress // traceable author statement /// 6968 // cellular defense response // traceable author statement /// 8037 // cell recognition // traceable author statement /// 19882 // antigen presentation // inferred from electronic annotation
206254_at	NM_001963	epidermal growth factor (beta-urogastrone)	EGF	1950	187 // activation of MAPK activity // traceable author statement /// 6260 // DNA replication // traceable author statement /// 7001 // chromosome organization and biogenesis (sensu Eukaryota) // traceable author statement /// 7173 // epidermal growth factor receptor signaling pathway // not recorded /// 8284 // positive regulation of cell proliferation // inferred from direct assay
206271_at	NM_003265	toll-like receptor 3	TLR3	7098	6954 // inflammatory response // inferred from electronic annotation /// 6972 // hyperosmotic response // non-traceable author statement /// 7165 // signal transduction // traceable author statement /// 7250 // activation of NF-kappaB-inducing kinase // non-traceable author statement /// 9597 // detection of virus // non-traceable author statement /// 42742 // defense response to bacteria // trac…
206289_at	NM_002141	homeobox A4	HOXA4	3201	6355 // regulation of transcription, DNA-dependent // inferred from electronic annotation /// 9653 // morphogenesis // traceable author statement /// 6350 // transcription // inferred from electronic annotation /// 7275 // development // inferred from electronic annotation /// 45449 // regulation of transcription // inferred from electronic annotation
206290_s_at	NM_002924	regulator of G-protein signalling 7	RGS7	6000	7186 // G-protein coupled receptor protein signaling pathway // inferred from electronic annotation /// 7242 // intracellular signaling cascade // inferred from electronic annotation /// 8277 // regulation of G-protein coupled receptor protein signaling pathway // non-traceable author statement /// 9968 // negative regulation of signal transduction // inferred from electronic annotation
206291_at	NM_006183	neurotensin	NTS	4922	7165 // signal transduction // non-traceable author statement /// 50880 // regulation of blood vessel size // inferred from electronic annotation
206296_x_at	NM_007181	mitogen-activated protein kinase kinase kinase kinase 1	MAP4K1	11184	185 // activation of MAPKKK activity // Unknown /// 6950 // response to stress // inferred from direct assay /// 7243 // protein kinase cascade // inferred from direct assay /// 7257 // activation of JNK activity // traceable author statement /// 18105 // peptidyl-serine phosphorylation // inferred from direct assay /// 45610 // regulation of hemocyte differentiation // inferred from sequence or …
206307_s_at	NM_004472	forkhead box D1	FOXD1	2297	6350 // transcription // inferred from electronic annotation /// 6355 // regulation of transcription, DNA-dependent // inferred from electronic annotation
206332_s_at	NM_005531	interferon, gamma-inducible protein 16	IFI16	3428	6350 // transcription // inferred from electronic annotation /// 6355 // regulation of transcription, DNA-dependent // non-traceable author statement /// 6955 // immune response // inferred from electronic annotation /// 8283 // cell proliferation // non-traceable author statement /// 9615 // response to virus // non-traceable author statement /// 30224 // monocyte differentiation // inferred fro…
206343_s_at	NM_013959	neuregulin 1	NRG1	3084	7399 // nervous system development // non-traceable author statement /// 9790 // embryonic development // inferred from electronic annotation /// 16481 // negative regulation of transcription // inferred from direct assay /// 30154 // cell differentiation // non-traceable author statement
206356_s_at	NM_002071	guanine nucleotide binding protein (G protein), alpha activating activity polypeptide, olfactory type	GNAL	2774	7165 // signal transduction // inferred from electronic annotation /// 7165 // signal transduction // traceable author statement /// 7186 // G-protein coupled receptor protein signaling pathway // inferred from electronic annotation /// 6810 // transport // inferred from electronic annotation /// 15031 // protein transport // inferred from electronic annotation
206363_at	NM_005360	v-maf musculoaponeurotic fibrosarcoma oncogene homolog (avian)	MAF	4094	6350 // transcription // inferred from electronic annotation /// 6355 // regulation of transcription, DNA-dependent // inferred from electronic annotation /// 6366 // transcription from RNA polymerase II promoter // traceable author statement
206370_at	NM_002649	phosphoinositide-3-kinase, catalytic, gamma polypeptide	PIK3CG	5294	7186 // G-protein coupled receptor protein signaling pathway // traceable author statement
206373_at	NM_003412	Zic family member 1 (odd-paired homolog, Drosophila)	ZIC1	7545	7389 // pattern specification // inferred from sequence or structural similarity /// 7399 // nervous system development // inferred from electronic annotation /// 7420 // brain development // inferred from direct assay /// 7610 // behavior // inferred from sequence or structural similarity /// 8589 // regulation of smoothened signaling pathway // inferred from sequence or structural similarity //…
206376_at	NM_018057	solute carrier family 6, member 15	SLC6A15	55117	6836 // neurotransmitter transport // inferred from electronic annotation /// 6836 // neurotransmitter transport // non-traceable author statement /// 6810 // transport // inferred from electronic annotation
206381_at	NM_021007	sodium channel, voltage-gated, type II, alpha 2	SCN2A2	6326	6811 // ion transport // inferred from electronic annotation /// 6814 // sodium ion transport // traceable author statement /// 6810 // transport // inferred from electronic annotation /// 6814 // sodium ion transport // inferred from electronic annotation
206382_s_at	NM_001709	brain-derived neurotrophic factor	BDNF	627	7399 // nervous system development // traceable author statement
206385_s_at	NM_020987	ankyrin 3, node of Ranvier (ankyrin G)	ANK3	288	6605 // protein targeting // non-traceable author statement /// 7016 // cytoskeletal anchoring // traceable author statement /// 7165 // signal transduction // inferred from electronic annotation
206392_s_at	NM_002888	retinoic acid receptor responder (tazarotene induced) 1	RARRES1	5918	8285 // negative regulation of cell proliferation // traceable author statement
206394_at	NM_004533	myosin binding protein C, fast type	MYBPC2	4606	6941 // striated muscle contraction // inferred from electronic annotation /// 7155 // cell adhesion // inferred from electronic annotation
206396_at	NM_004170	solute carrier family 1 (neuronal/epithelial high affinity glutamate transporter, system Xag), member 1	SLC1A1	6505	6810 // transport // inferred from electronic annotation /// 6835 // dicarboxylic acid transport // inferred from electronic annotation /// 7268 // synaptic transmission // traceable author statement /// 15813 // L-glutamate transport // traceable author statement
206403_at	NM_014717	zinc finger protein 536	ZNF536	9745	---
206404_at	NM_002010	fibroblast growth factor 9 (glia-activating factor)	FGF9	2254	74 // regulation of progression through cell cycle // inferred from electronic annotation /// 7165 // signal transduction // traceable author statement /// 7267 // cell-cell signaling // traceable author statement /// 8283 // cell proliferation // inferred from electronic annotation /// 30154 // cell differentiation // inferred from electronic annotation /// 7275 // development // inferred from e…
206415_at	AI769310	tolloid-like 1	TLL1	7092	1501 // skeletal development // traceable author statement /// 6508 // proteolysis // inferred from electronic annotation /// 30154 // cell differentiation // inferred from electronic annotation /// 7275 // development // inferred from electronic annotation
206432_at	NM_005328	hyaluronan synthase 2	HAS2	3037	---
206440_at	NM_004664	lin-7 homolog A (C. elegans)	LIN7A	8825	6461 // protein complex assembly // traceable author statement /// 6887 // exocytosis // traceable author statement /// 15031 // protein transport // inferred from electronic annotation /// 6810 // transport // inferred from electronic annotation /// 6887 // exocytosis // inferred from electronic annotation
206453_s_at	NM_016250	NDRG family member 2	NDRG2	57447	7399 // nervous system development // inferred from electronic annotation /// 30154 // cell differentiation // inferred from electronic annotation /// 30154 // cell differentiation // inferred from sequence or structural similarity /// 7275 // development // inferred from electronic annotation
206456_at	NM_000810	gamma-aminobutyric acid (GABA) A receptor, alpha 5	GABRA5	2558	6811 // ion transport // inferred from electronic annotation /// 6821 // chloride transport // inferred from electronic annotation /// 7165 // signal transduction // traceable author statement /// 7214 // gamma-aminobutyric acid signaling pathway // inferred from electronic annotation /// 6810 // transport // inferred from electronic annotation /// 6810 // transport // traceable author statement
206470_at	NM_005761	plexin C1	PLXNC1	10154	7155 // cell adhesion // traceable author statement /// 7275 // development // inferred from electronic annotation
206481_s_at	NM_001290	LIM domain binding 2	LDB2	9079	7275 // development // inferred from electronic annotation
206489_s_at	NM_004746	discs, large (Drosophila) homolog-associated protein 1	DLGAP1	9229	7267 // cell-cell signaling // inferred from electronic annotation /// 7268 // synaptic transmission // non-traceable author statement /// 7268 // synaptic transmission // traceable author statement
206502_s_at	NM_002196	insulinoma-associated 1	INSM1	3642	6350 // transcription // inferred from electronic annotation /// 6355 // regulation of transcription, DNA-dependent // inferred from electronic annotation
206526_at	NM_015653	RIB43A domain with coiled-coils 2	RIBC2	26150	---
206546_at	NM_014258	synaptonemal complex protein 2	SYCP2	10388	7049 // cell cycle // inferred from electronic annotation /// 7126 // meiosis // inferred from electronic annotation /// 7128 // meiotic prophase I // non-traceable author statement /// 7130 // synaptonemal complex formation // non-traceable author statement /// 51301 // cell division // inferred from electronic annotation
206547_s_at	NM_006240	protein phosphatase, EF-hand calcium binding domain 1	PPEF1	5475	6470 // protein amino acid dephosphorylation // traceable author statement /// 50906 // detection of stimulus during sensory perception // inferred from electronic annotation
206552_s_at	NM_003182	tachykinin, precursor 1 (substance K, substance P, neurokinin 1, neurokinin 2, neuromedin L, neurokinin alpha, neuropeptide K, neuropeptide gamma)	TAC1	6863	7217 // tachykinin signaling pathway // inferred from electronic annotation /// 7218 // neuropeptide signaling pathway // inferred from electronic annotation /// 7267 // cell-cell signaling // traceable author statement /// 7268 // synaptic transmission // inferred from electronic annotation /// 7320 // insemination // traceable author statement /// 9582 // detection of abiotic stimulus // tracea…
206553_at	NM_002535	2'-5'-oligoadenylate synthetase 2, 69/71kDa	OAS2	4939	6139 // nucleobase, nucleoside, nucleotide and nucleic acid metabolism // traceable author statement /// 6955 // immune response // inferred from electronic annotation
206577_at	NM_003381	vasoactive intestinal peptide	VIP	7432	6936 // muscle contraction // not recorded /// 7186 // G-protein coupled receptor protein signaling pathway // traceable author statement /// 7267 // cell-cell signaling // not recorded /// 7589 // fluid secretion // traceable author statement /// 8284 // positive regulation of cell proliferation // traceable author statement
206578_at	NM_004387	NK2 transcription factor related, locus 5 (Drosophila)	NKX2-5	1482	122 // negative regulation of transcription from RNA polymerase II promoter // inferred from sequence or structural similarity /// 7275 // development // inferred from electronic annotation /// 7507 // heart development // traceable author statement /// 6357 // regulation of transcription from RNA polymerase II promoter // inferred from sequence or structural similarity /// 6355 // regulation of …
206580_s_at	NM_016938	EGF-containing fibulin-like extracellular matrix protein 2	EFEMP2	30008	7156 // homophilic cell adhesion // inferred from electronic annotation /// 7596 // blood coagulation // inferred from electronic annotation
206584_at	NM_015364	lymphocyte antigen 96	LY96	23643	6954 // inflammatory response // inferred from electronic annotation /// 6968 // cellular defense response // traceable author statement /// 7166 // cell surface receptor linked signal transduction // traceable author statement /// 19733 // antibacterial humoral response (sensu Vertebrata) // traceable author statement /// 6955 // immune response // inferred from electronic annotation
206601_s_at	BC005124	homeobox D3	HOXD3	3232	6355 // regulation of transcription, DNA-dependent // inferred from electronic annotation /// 9653 // morphogenesis // not recorded /// 6350 // transcription // inferred from electronic annotation /// 7275 // development // inferred from electronic annotation /// 45449 // regulation of transcription // inferred from electronic annotation
206624_at	NM_004654	ubiquitin specific peptidase 9, Y-linked (fat facets-like, Drosophila)	USP9Y	8287	6511 // ubiquitin-dependent protein catabolism // inferred from electronic annotation /// 7283 // spermatogenesis // traceable author statement /// 6512 // ubiquitin cycle // inferred from electronic annotation
206631_at	NM_000956	prostaglandin E receptor 2 (subtype EP2), 53kDa	PTGER2	5732	7165 // signal transduction // inferred from electronic annotation /// 7186 // G-protein coupled receptor protein signaling pathway // traceable author statement /// 7186 // G-protein coupled receptor protein signaling pathway // inferred from electronic annotation
206632_s_at	NM_004900	apolipoprotein B mRNA editing enzyme, catalytic polypeptide-like 3B	APOBEC3B	9582	---
206662_at	NM_002064	glutaredoxin (thioltransferase)	GLRX	2745	6118 // electron transport // inferred from electronic annotation /// 45454 // cell redox homeostasis // inferred from electronic annotation /// 6810 // transport // inferred from electronic annotation
206664_at	NM_001041	sucrase-isomaltase (alpha-glucosidase)	SI	6476	5975 // carbohydrate metabolism // inferred from electronic annotation
206693_at	NM_000880	interleukin 7	IL7	3574	6955 // immune response // inferred from electronic annotation /// 6959 // humoral immune response // traceable author statement /// 7267 // cell-cell signaling // traceable author statement /// 8284 // positive regulation of cell proliferation // traceable author statement /// 9887 // organ morphogenesis // traceable author statement /// 30890 // positive regulation of B cell proliferation // in…
206700_s_at	NM_004653	Smcy homolog, Y-linked (mouse)	SMCY	8284	6355 // regulation of transcription, DNA-dependent // inferred from electronic annotation /// 7283 // spermatogenesis // non-traceable author statement
206706_at	NM_002527	neurotrophin 3	NTF3	4908	6916 // anti-apoptosis // not recorded /// 6928 // cell motility // not recorded /// 7165 // signal transduction // traceable author statement /// 7267 // cell-cell signaling // traceable author statement /// 7399 // nervous system development // traceable author statement
206710_s_at	NM_012307	erythrocyte membrane protein band 4.1-like 3	EPB41L3	23136	30866 // cortical actin cytoskeleton organization and biogenesis // inferred from electronic annotation
206757_at	NM_001083	phosphodiesterase 5A, cGMP-specific	PDE5A	8654	7165 // signal transduction // inferred from electronic annotation /// 7165 // signal transduction // non-traceable author statement /// 9187 // cyclic nucleotide metabolism // non-traceable author statement
206765_at	AF153820	potassium inwardly-rectifying channel, subfamily J, member 2	KCNJ2	3759	6811 // ion transport // inferred from electronic annotation /// 6813 // potassium ion transport // inferred from electronic annotation /// 6810 // transport // inferred from electronic annotation
206786_at	NM_000200	histatin 3	HTN3	3347	1503 // ossification // inferred from electronic annotation /// 6805 // xenobiotic metabolism // inferred from electronic annotation /// 9613 // response to pest, pathogen or parasite // inferred from electronic annotation /// 42742 // defense response to bacteria // non-traceable author statement /// 50832 // defense response to fungi // inferred from electronic annotation /// 42742 // defense r…
206805_at	NM_006080	sema domain, immunoglobulin domain (Ig), short basic domain, secreted, (semaphorin) 3A	SEMA3A	10371	7399 // nervous system development // inferred from electronic annotation /// 30154 // cell differentiation // inferred from electronic annotation /// 7275 // development // inferred from electronic annotation
206847_s_at	AF026397	homeobox A7	HOXA7	3204	6355 // regulation of transcription, DNA-dependent // inferred from electronic annotation /// 7275 // development // inferred from electronic annotation /// 6350 // transcription // inferred from electronic annotation /// 45449 // regulation of transcription // inferred from electronic annotation
206852_at	NM_004440	EPH receptor A7	EPHA7	2045	6468 // protein amino acid phosphorylation // inferred from electronic annotation /// 7169 // transmembrane receptor protein tyrosine kinase signaling pathway // inferred from electronic annotation /// 16310 // phosphorylation // inferred from sequence or structural similarity
206858_s_at	NM_004503	homeobox C6	HOXC6	3223	6355 // regulation of transcription, DNA-dependent // inferred from electronic annotation /// 6357 // regulation of transcription from RNA polymerase II promoter // traceable author statement /// 7275 // development // traceable author statement /// 6350 // transcription // inferred from electronic annotation /// 7275 // development // inferred from electronic annotation /// 45449 // regulation o…
206866_at	NM_001794	cadherin 4, type 1, R-cadherin (retinal)	CDH4	1002	7155 // cell adhesion // traceable author statement /// 7156 // homophilic cell adhesion // inferred from electronic annotation /// 7155 // cell adhesion // inferred from electronic annotation
206893_at	NM_002968	sal-like 1 (Drosophila)	SALL1	6299	6350 // transcription // inferred from electronic annotation /// 6355 // regulation of transcription, DNA-dependent // inferred from electronic annotation /// 9653 // morphogenesis // traceable author statement
206935_at	NM_002590	protocadherin 8	PCDH8	5100	7155 // cell adhesion // inferred from electronic annotation /// 7156 // homophilic cell adhesion // inferred from electronic annotation /// 7267 // cell-cell signaling // traceable author statement
206939_at	NM_005215	deleted in colorectal carcinoma	DCC	1630	6915 // apoptosis // inferred from electronic annotation /// 6917 // induction of apoptosis // traceable author statement /// 7049 // cell cycle // inferred from electronic annotation /// 7275 // development // inferred from electronic annotation /// 7409 // axonogenesis // traceable author statement /// 45786 // negative regulation of progression through cell cycle // inferred from electronic an…
206941_x_at	NM_012431	sema domain, immunoglobulin domain (Ig), short basic domain, secreted, (semaphorin) 3E	SEMA3E	9723	6928 // cell motility // not recorded /// 7399 // nervous system development // inferred from electronic annotation /// 30154 // cell differentiation // inferred from electronic annotation /// 7275 // development // inferred from electronic annotation
206953_s_at	NM_012302	latrophilin 2	LPHN2	23266	7165 // signal transduction // inferred from electronic annotation /// 7186 // G-protein coupled receptor protein signaling pathway // inferred from electronic annotation /// 7218 // neuropeptide signaling pathway // inferred from electronic annotation /// 7186 // G-protein coupled receptor protein signaling pathway // traceable author statement /// 7186 // G-protein coupled receptor protein sign…
206960_at	NM_005296	G protein-coupled receptor 23	GPR23	2846	7165 // signal transduction // inferred from electronic annotation /// 7186 // G-protein coupled receptor protein signaling pathway // traceable author statement /// 7186 // G-protein coupled receptor protein signaling pathway // inferred from electronic annotation
207002_s_at	NM_002656	pleiomorphic adenoma gene-like 1	PLAGL1	5325	6350 // transcription // inferred from electronic annotation /// 6355 // regulation of transcription, DNA-dependent // inferred from electronic annotation /// 6917 // induction of apoptosis // traceable author statement /// 7050 // cell cycle arrest // traceable author statement /// 45944 // positive regulation of transcription from RNA polymerase II promoter // inferred from direct assay
207012_at	U79292	matrix metallopeptidase 16 (membrane-inserted)	MMP16	4325	270 // peptidoglycan metabolism // inferred from electronic annotation /// 6508 // proteolysis // inferred from electronic annotation /// 30574 // collagen catabolism // inferred from electronic annotation
207039_at	NM_000077	cyclin-dependent kinase inhibitor 2A (melanoma, p16, inhibits CDK4)	CDKN2A	1029	75 // cell cycle checkpoint // traceable author statement /// 79 // regulation of cyclin-dependent protein kinase activity // traceable author statement /// 6350 // transcription // inferred from electronic annotation /// 6355 // regulation of transcription, DNA-dependent // inferred from electronic annotation /// 6364 // rRNA processing // inferred from electronic annotation /// 6915 // apoptosi…
207057_at	NM_004731	solute carrier family 16, member 7 (monocarboxylic acid transporter 2)	SLC16A7	9194	6810 // transport // inferred from electronic annotation /// 6848 // pyruvate transport // traceable author statement /// 15711 // organic anion transport // inferred from electronic annotation
207063_at	NM_018542	chromosome Y open reading frame 14	CYorf14	55410	---
207076_s_at	NM_000050	argininosuccinate synthetase 1	ASS1	445	50 // urea cycle // traceable author statement /// 6526 // arginine biosynthesis // inferred from electronic annotation /// 8652 // amino acid biosynthesis // inferred from electronic annotation /// 50 // urea cycle // inferred from electronic annotation
207084_at	NM_005604	POU domain, class 3, transcription factor 2	POU3F2	5454	6355 // regulation of transcription, DNA-dependent // inferred from electronic annotation /// 8284 // positive regulation of cell proliferation // inferred from direct assay /// 6350 // transcription // inferred from electronic annotation /// 45449 // regulation of transcription // inferred from electronic annotation
207086_x_at	NM_001474	G antigen 1 /// G antigen 2 /// G antigen 4 /// G antigen 5 /// G antigen 6 /// G antigen 7 /// G antigen 7B /// G antigen 8 /// G antigen 11 /// G antigen 12C /// G antigen 12D /// G antigen 12E /// G antigen 12G /// G antigen 12H /// similar to GAGE-8 protein (G antigen 8)	GAGE1 /// GAGE2 /// GAGE4 /// GAGE5 /// GAGE6 /// GAGE7 /// GAGE7B /// GAGE8 /// GAGE11 /// GAGE12C /// GAGE12D /// GAGE12E /// GAGE12G /// GAGE12H /// LOC645093		6968 // cellular defense response // traceable author statement
207087_x_at	NM_020478	ankyrin 1, erythrocytic	ANK1	286	7165 // signal transduction // inferred from electronic annotation /// 45199 // maintenance of epithelial cell polarity // traceable author statement
207119_at	NM_006258	protein kinase, cGMP-dependent, type I	PRKG1	5592	6468 // protein amino acid phosphorylation // inferred from electronic annotation /// 6468 // protein amino acid phosphorylation // traceable author statement /// 6940 // regulation of smooth muscle contraction // not recorded /// 7165 // signal transduction // traceable author statement /// 30036 // actin cytoskeleton organization and biogenesis // traceable author statement
207142_at	NM_002239	potassium inwardly-rectifying channel, subfamily J, member 3	KCNJ3	3760	6811 // ion transport // inferred from electronic annotation /// 6813 // potassium ion transport // traceable author statement /// 6810 // transport // inferred from electronic annotation /// 6813 // potassium ion transport // inferred from electronic annotation
207144_s_at	NM_004143	Cbp/p300-interacting transactivator, with Glu/Asp-rich carboxy-terminal domain, 1	CITED1	4435	6357 // regulation of transcription from RNA polymerase II promoter // traceable author statement /// 30318 // melanocyte differentiation // inferred from mutant phenotype /// 43473 // pigmentation // inferred from mutant phenotype /// 45449 // regulation of transcription // inferred from electronic annotation
207145_at	NM_005259	growth differentiation factor 8	GDF8	2660	7179 // transforming growth factor beta receptor signaling pathway // not recorded /// 7517 // muscle development // traceable author statement /// 40007 // growth // inferred from electronic annotation
207147_at	NM_004405	distal-less homeobox 2	DLX2	1746	6355 // regulation of transcription, DNA-dependent // inferred from electronic annotation /// 7275 // development // inferred from electronic annotation /// 7420 // brain development // traceable author statement /// 45449 // regulation of transcription // inferred from electronic annotation
207149_at	L33477	cadherin 12, type 2 (N-cadherin 2)	CDH12	1010	7155 // cell adhesion // inferred from electronic annotation /// 7156 // homophilic cell adhesion // inferred from electronic annotation /// 7156 // homophilic cell adhesion // non-traceable author statement /// 16337 // cell-cell adhesion // non-traceable author statement
207172_s_at	NM_001797	cadherin 11, type 2, OB-cadherin (osteoblast)	CDH11	1009	1503 // ossification // non-traceable author statement /// 7155 // cell adhesion // inferred from electronic annotation /// 7156 // homophilic cell adhesion // inferred from electronic annotation /// 7156 // homophilic cell adhesion // non-traceable author statement /// 1501 // skeletal development // traceable author statement /// 7155 // cell adhesion // traceable author statement /// 16337 // …
207173_x_at	D21254	cadherin 11, type 2, OB-cadherin (osteoblast)	CDH11	1009	1503 // ossification // non-traceable author statement /// 7155 // cell adhesion // inferred from electronic annotation /// 7156 // homophilic cell adhesion // inferred from electronic annotation /// 7156 // homophilic cell adhesion // non-traceable author statement /// 1501 // skeletal development // traceable author statement /// 7155 // cell adhesion // traceable author statement /// 16337 // …
207178_s_at	NM_002031	fyn-related kinase	FRK	2444	74 // regulation of progression through cell cycle // traceable author statement /// 6468 // protein amino acid phosphorylation // traceable author statement /// 7242 // intracellular signaling cascade // inferred from electronic annotation /// 8285 // negative regulation of cell proliferation // traceable author statement /// 6468 // protein amino acid phosphorylation // inferred from electronic…
207180_s_at	NM_006410	HIV-1 Tat interactive protein 2, 30kDa	HTATIP2	10553	7049 // cell cycle // inferred from electronic annotation /// 30154 // cell differentiation // inferred from electronic annotation /// 42981 // regulation of apoptosis // inferred from direct assay /// 45765 // regulation of angiogenesis // inferred from direct assay /// 45786 // negative regulation of progression through cell cycle // inferred from electronic annotation /// 51170 // nuclear impo…
207264_at	NM_016657	KDEL (Lys-Asp-Glu-Leu) endoplasmic reticulum protein retention receptor 3	KDELR3	11015	6621 // protein retention in ER // inferred from electronic annotation /// 6888 // ER to Golgi vesicle-mediated transport // inferred from electronic annotation /// 15031 // protein transport // inferred from electronic annotation /// 6810 // transport // inferred from electronic annotation
207325_x_at	NM_004988	melanoma antigen family A, 1 (directs expression of antigen MZ2-E)	MAGEA1	4100	---
207327_at	NM_004100	eyes absent homolog 4 (Drosophila)	EYA4	2070	6350 // transcription // inferred from electronic annotation /// 6355 // regulation of transcription, DNA-dependent // inferred from electronic annotation /// 7601 // visual perception // traceable author statement /// 7605 // sensory perception of sound // inferred from electronic annotation /// 8152 // metabolism // inferred from electronic annotation /// 9653 // morphogenesis // traceable auth…
207336_at	NM_006940	SRY (sex determining region Y)-box 5	SOX5	6660	6350 // transcription // inferred from electronic annotation /// 6355 // regulation of transcription, DNA-dependent // inferred from electronic annotation /// 6366 // transcription from RNA polymerase II promoter // traceable author statement /// 16049 // cell growth // traceable author statement
207375_s_at	NM_002189	interleukin 15 receptor, alpha	IL15RA	3601	7165 // signal transduction // traceable author statement /// 8283 // cell proliferation // traceable author statement
207397_s_at	NM_000523	homeobox D13	HOXD13	3239	1501 // skeletal development // traceable author statement /// 6355 // regulation of transcription, DNA-dependent // traceable author statement /// 6366 // transcription from RNA polymerase II promoter // traceable author statement /// 7275 // development // traceable author statement
207398_at	NM_000523	homeobox D13	HOXD13	3239	1501 // skeletal development // traceable author statement /// 6355 // regulation of transcription, DNA-dependent // traceable author statement /// 6366 // transcription from RNA polymerase II promoter // traceable author statement /// 7275 // development // traceable author statement
207414_s_at	NM_002570	proprotein convertase subtilisin/kexin type 6	PCSK6	5046	6508 // proteolysis // inferred from electronic annotation /// 6508 // proteolysis // traceable author statement /// 7267 // cell-cell signaling // traceable author statement
207419_s_at	NM_002872	ras-related C3 botulinum toxin substrate 2 (rho family, small GTP binding protein Rac2)	RAC2	5880	7165 // signal transduction // traceable author statement /// 7264 // small GTPase mediated signal transduction // inferred from electronic annotation
207453_s_at	NM_012266	DnaJ (Hsp40) homolog, subfamily B, member 5	DNAJB5	25822	6457 // protein folding // inferred from electronic annotation /// 6986 // response to unfolded protein // inferred from expression pattern
207480_s_at	NM_020149	Meis1, myeloid ecotropic viral integration site 1 homolog 2 (mouse)	MEIS2	4212	122 // negative regulation of transcription from RNA polymerase II promoter // traceable author statement /// 6355 // regulation of transcription, DNA-dependent // inferred from electronic annotation /// 45449 // regulation of transcription // inferred from electronic annotation /// 6350 // transcription // inferred from electronic annotation
207522_s_at	NM_005173	ATPase, Ca++ transporting, ubiquitous	ATP2A3	489	6812 // cation transport // inferred from electronic annotation /// 6816 // calcium ion transport // traceable author statement /// 8152 // metabolism // inferred from electronic annotation /// 15992 // proton transport // inferred from electronic annotation /// 6810 // transport // inferred from electronic annotation /// 6811 // ion transport // inferred from electronic annotation /// 6816 // ca…
207558_s_at	NM_000325	paired-like homeodomain transcription factor 2	PITX2	5308	6355 // regulation of transcription, DNA-dependent // inferred from direct assay /// 7275 // development // inferred from electronic annotation /// 7368 // determination of left/right symmetry // traceable author statement /// 9887 // organ morphogenesis // traceable author statement /// 6350 // transcription // inferred from electronic annotation /// 6355 // regulation of transcription, DNA-depe…
207583_at	NM_005164	ATP-binding cassette, sub-family D (ALD), member 2	ABCD2	225	6631 // fatty acid metabolism // traceable author statement /// 6810 // transport // traceable author statement /// 6810 // transport // inferred from electronic annotation
207655_s_at	NM_013314	B-cell linker	BLNK	29760	7242 // intracellular signaling cascade // inferred from electronic annotation /// 42113 // B cell activation // inferred from electronic annotation
207666_x_at	NM_021014	synovial sarcoma, X breakpoint 3	SSX3	10214	6350 // transcription // inferred from electronic annotation /// 6355 // regulation of transcription, DNA-dependent // inferred from electronic annotation
207702_s_at	NM_012301	membrane associated guanylate kinase, WW and PDZ domain containing 2	MAGI2	9863	7162 // negative regulation of cell adhesion // inferred from direct assay /// 30168 // platelet activation // inferred from direct assay /// 30195 // negative regulation of blood coagulation // inferred from direct assay
207703_at	NM_014893	neuroligin 4, Y-linked	NLGN4Y	22829	7155 // cell adhesion // inferred from electronic annotation
207704_s_at	NM_003644	growth arrest-specific 7	GAS7	8522	7050 // cell cycle arrest // traceable author statement /// 7399 // nervous system development // inferred from electronic annotation /// 30154 // cell differentiation // inferred from electronic annotation /// 7275 // development // inferred from electronic annotation
207714_s_at	NM_004353	serpin peptidase inhibitor, clade H (heat shock protein 47), member 1, (collagen binding protein 1)	SERPINH1	871	6457 // protein folding // inferred from electronic annotation /// 6810 // transport // inferred from electronic annotation /// 6986 // response to unfolded protein // inferred from electronic annotation /// 6986 // response to unfolded protein // traceable author statement
207717_s_at	NM_004572	plakophilin 2	PKP2	5318	16337 // cell-cell adhesion // non-traceable author statement /// 7155 // cell adhesion // inferred from electronic annotation
207768_at	NM_001965	early growth response 4	EGR4	1961	6350 // transcription // inferred from electronic annotation /// 6355 // regulation of transcription, DNA-dependent // inferred from electronic annotation /// 8284 // positive regulation of cell proliferation // traceable author statement
207789_s_at	NM_001936	dipeptidyl-peptidase 6	DPP6	1804	6508 // proteolysis // inferred from electronic annotation
207826_s_at	NM_002167	inhibitor of DNA binding 3, dominant negative helix-loop-helix protein	ID3	3399	7275 // development // traceable author statement /// 16481 // negative regulation of transcription // inferred from direct assay /// 43433 // negative regulation of transcription factor activity // inferred from direct assay /// 45449 // regulation of transcription // inferred from electronic annotation
207852_at	NM_002994	chemokine (C-X-C motif) ligand 5	CXCL5	6374	6935 // chemotaxis // traceable author statement /// 6954 // inflammatory response // not recorded /// 7165 // signal transduction // traceable author statement /// 7267 // cell-cell signaling // traceable author statement /// 8284 // positive regulation of cell proliferation // traceable author statement /// 6955 // immune response // inferred from electronic annotation /// 6955 // immune respon…
207957_s_at	NM_002738	Protein kinase C, beta 1	PRKCB1	5579	6468 // protein amino acid phosphorylation // traceable author statement /// 7242 // intracellular signaling cascade // inferred from electronic annotation /// 6468 // protein amino acid phosphorylation // inferred from electronic annotation /// 7165 // signal transduction // non-traceable author statement
207981_s_at	NM_001438	estrogen-related receptor gamma	ESRRG	2104	6350 // transcription // inferred from electronic annotation /// 7275 // development // inferred from sequence or structural similarity /// 45893 // positive regulation of transcription, DNA-dependent // inferred from sequence or structural similarity /// 6355 // regulation of transcription, DNA-dependent // inferred from sequence or structural similarity /// 6355 // regulation of transcription, …
207996_s_at	NM_004338	chromosome 18 open reading frame 1	C18orf1	753	---
208010_s_at	NM_012411	protein tyrosine phosphatase, non-receptor type 22 (lymphoid)	PTPN22	26191	6470 // protein amino acid dephosphorylation // inferred from electronic annotation /// 6470 // protein amino acid dephosphorylation // traceable author statement /// 7165 // signal transduction // traceable author statement /// 7275 // development // not recorded
208017_s_at	NM_005369	MCF.2 cell line derived transforming sequence	MCF2	4168	7242 // intracellular signaling cascade // inferred from electronic annotation /// 35023 // regulation of Rho protein signal transduction // inferred from electronic annotation
208025_s_at	NM_003483	high mobility group AT-hook 2 /// high mobility group AT-hook 2	HMGA2	8091	6325 // establishment and/or maintenance of chromatin architecture // traceable author statement /// 6350 // transcription // inferred from electronic annotation /// 6355 // regulation of transcription, DNA-dependent // inferred from electronic annotation /// 6355 // regulation of transcription, DNA-dependent // traceable author statement /// 7001 // chromosome organization and biogenesis (sensu …
208062_s_at	NM_013984	neuregulin 2	NRG2	9542	6916 // anti-apoptosis // not recorded /// 7165 // signal transduction // traceable author statement /// 7267 // cell-cell signaling // not recorded /// 9790 // embryonic development // inferred from electronic annotation /// 7275 // development // not recorded
208065_at	NM_015879	ST8 alpha-N-acetyl-neuraminide alpha-2,8-sialyltransferase 3	ST8SIA3	51046	6486 // protein amino acid glycosylation // inferred from electronic annotation /// 6491 // N-glycan processing // traceable author statement /// 6688 // glycosphingolipid biosynthesis // traceable author statement /// 9311 // oligosaccharide metabolism // traceable author statement
208092_s_at	NM_030797	family with sequence similarity 49, member A /// family with sequence similarity 49, member A	FAM49A	81553	---
208096_s_at	NM_030820	collagen, type XXI, alpha 1 /// collagen, type XXI, alpha 1	COL21A1	81578	6817 // phosphate transport // inferred from electronic annotation /// 7155 // cell adhesion // inferred from electronic annotation
208131_s_at	NM_000961	prostaglandin I2 (prostacyclin) synthase /// prostaglandin I2 (prostacyclin) synthase	PTGIS	5740	1516 // prostaglandin biosynthesis // inferred from electronic annotation /// 6118 // electron transport // inferred from electronic annotation /// 6629 // lipid metabolism // non-traceable author statement /// 6633 // fatty acid biosynthesis // inferred from electronic annotation /// 8610 // lipid biosynthesis // inferred from electronic annotation /// 6693 // prostaglandin metabolism // not rec…
208146_s_at	NM_031311	carboxypeptidase, vitellogenic-like /// carboxypeptidase, vitellogenic-like	CPVL	54504	6508 // proteolysis // inferred from electronic annotation
208291_s_at	NM_000360	tyrosine hydroxylase	TH	7054	7268 // synaptic transmission // inferred from electronic annotation /// 9072 // aromatic amino acid family metabolism // inferred from electronic annotation /// 9653 // morphogenesis // traceable author statement /// 42136 // neurotransmitter biosynthesis // inferred from electronic annotation /// 42423 // catecholamine biosynthesis // inferred from electronic annotation /// 6584 // catecholamin…
208352_x_at	NM_020479	ankyrin 1, erythrocytic	ANK1	286	7165 // signal transduction // inferred from electronic annotation /// 45199 // maintenance of epithelial cell polarity // traceable author statement
208358_s_at	NM_003360	UDP glycosyltransferase 8 (UDP-galactose ceramide galactosyltransferase)	UGT8	7368	6688 // glycosphingolipid biosynthesis // not recorded /// 7417 // central nervous system development // traceable author statement /// 7422 // peripheral nervous system development // traceable author statement /// 8152 // metabolism // inferred from electronic annotation
208359_s_at	NM_004981	potassium inwardly-rectifying channel, subfamily J, member 4	KCNJ4	3761	6811 // ion transport // inferred from electronic annotation /// 6813 // potassium ion transport // traceable author statement /// 6810 // transport // inferred from electronic annotation /// 6813 // potassium ion transport // inferred from electronic annotation
208399_s_at	NM_000114	endothelin 3	EDN3	1908	7165 // signal transduction // traceable author statement /// 7267 // cell-cell signaling // traceable author statement /// 7605 // sensory perception of sound // inferred from electronic annotation /// 9405 // pathogenesis // inferred from electronic annotation /// 9653 // morphogenesis // not recorded /// 19229 // regulation of vasoconstriction // inferred from electronic annotation /// 42310 /…
208427_s_at	NM_004432	ELAV (embryonic lethal, abnormal vision, Drosophila)-like 2 (Hu antigen B)	ELAVL2	1993	6355 // regulation of transcription, DNA-dependent // traceable author statement
208502_s_at	NM_002653	paired-like homeodomain transcription factor 1	PITX1	5307	1501 // skeletal development // traceable author statement /// 6355 // regulation of transcription, DNA-dependent // inferred from electronic annotation /// 9653 // morphogenesis // traceable author statement /// 6350 // transcription // inferred from electronic annotation /// 7275 // development // inferred from electronic annotation /// 45449 // regulation of transcription // inferred from elec…
208510_s_at	NM_015869	peroxisome proliferative activated receptor, gamma	PPARG	5468	6091 // generation of precursor metabolites and energy // traceable author statement /// 6350 // transcription // inferred from electronic annotation /// 6355 // regulation of transcription, DNA-dependent // inferred from electronic annotation /// 6357 // regulation of transcription from RNA polymerase II promoter // traceable author statement /// 6629 // lipid metabolism // traceable author stat…
208530_s_at	NM_016152	retinoic acid receptor, beta	RARB	5915	6350 // transcription // inferred from electronic annotation /// 6355 // regulation of transcription, DNA-dependent // inferred from direct assay /// 6355 // regulation of transcription, DNA-dependent // inferred from electronic annotation /// 7165 // signal transduction // traceable author statement
208608_s_at	NM_021021	syntrophin, beta 1 (dystrophin-associated protein A1, 59kDa, basic component 1)	SNTB1	6641	6936 // muscle contraction // traceable author statement
208650_s_at	BG327863	CD24 molecule /// hypothetical protein LOC647456	CD24 /// LOC647456		6959 // humoral immune response // traceable author statement
208651_x_at	M58664	CD24 molecule	CD24	934	6959 // humoral immune response // traceable author statement
208690_s_at	BC000915	PDZ and LIM domain 1 (elfin)	PDLIM1	9124	6979 // response to oxidative stress // traceable author statement
208711_s_at	BC000076	cyclin D1	CCND1	595	74 // regulation of progression through cell cycle // inferred from electronic annotation /// 82 // G1/S transition of mitotic cell cycle // non-traceable author statement /// 7049 // cell cycle // inferred from electronic annotation /// 51301 // cell division // inferred from electronic annotation /// 7601 // visual perception // inferred from electronic annotation /// 50896 // response to stimu…
208712_at	M73554	cyclin D1	CCND1	595	74 // regulation of progression through cell cycle // inferred from electronic annotation /// 82 // G1/S transition of mitotic cell cycle // non-traceable author statement /// 7049 // cell cycle // inferred from electronic annotation /// 51301 // cell division // inferred from electronic annotation
208747_s_at	M18767	complement component 1, s subcomponent	C1S	716	6508 // proteolysis // inferred from electronic annotation /// 6958 // complement activation, classical pathway // inferred from electronic annotation /// 7186 // G-protein coupled receptor protein signaling pathway // inferred from electronic annotation /// 45087 // innate immune response // inferred from electronic annotation /// 6955 // immune response // inferred from electronic annotation //…
208782_at	BC000055	follistatin-like 1	FSTL1	11167	---
208789_at	BC004295	polymerase I and transcript release factor	PTRF	284119	6350 // transcription // inferred from electronic annotation /// 6353 // transcription termination // inferred from electronic annotation /// 6355 // regulation of transcription, DNA-dependent // inferred from electronic annotation
208790_s_at	AF312393	polymerase I and transcript release factor	PTRF	284119	6350 // transcription // inferred from electronic annotation /// 6353 // transcription termination // inferred from electronic annotation /// 6355 // regulation of transcription, DNA-dependent // inferred from electronic annotation
208791_at	M25915	clusterin	CLU	1191	6629 // lipid metabolism // non-traceable author statement /// 6915 // apoptosis // inferred from electronic annotation /// 6958 // complement activation, classical pathway // inferred from electronic annotation /// 8219 // cell death // inferred from electronic annotation /// 45087 // innate immune response // inferred from electronic annotation /// 6955 // immune response // inferred from elect…
208792_s_at	M25915	clusterin	CLU	1191	6629 // lipid metabolism // non-traceable author statement /// 6915 // apoptosis // inferred from electronic annotation /// 6958 // complement activation, classical pathway // inferred from electronic annotation /// 8219 // cell death // inferred from electronic annotation /// 45087 // innate immune response // inferred from electronic annotation /// 6955 // immune response // inferred from elect…
208812_x_at	BC004489	major histocompatibility complex, class I, C	HLA-C	3107	19882 // antigen presentation // inferred from electronic annotation /// 19883 // antigen presentation, endogenous antigen // inferred from electronic annotation /// 19885 // antigen processing, endogenous antigen via MHC class I // inferred from electronic annotation /// 6955 // immune response // inferred from electronic annotation /// 6955 // immune response // non-traceable author statement
208891_at	BC003143	dual specificity phosphatase 6	DUSP6	1848	74 // regulation of progression through cell cycle // non-traceable author statement /// 188 // inactivation of MAPK activity // inferred from direct assay /// 6470 // protein amino acid dephosphorylation // traceable author statement /// 6470 // protein amino acid dephosphorylation // inferred from electronic annotation
208892_s_at	BC003143	dual specificity phosphatase 6	DUSP6	1848	74 // regulation of progression through cell cycle // non-traceable author statement /// 188 // inactivation of MAPK activity // inferred from direct assay /// 6470 // protein amino acid dephosphorylation // traceable author statement /// 6470 // protein amino acid dephosphorylation // inferred from electronic annotation
208893_s_at	BC005047	dual specificity phosphatase 6	DUSP6	1848	74 // regulation of progression through cell cycle // non-traceable author statement /// 188 // inactivation of MAPK activity // inferred from direct assay /// 6470 // protein amino acid dephosphorylation // traceable author statement /// 6470 // protein amino acid dephosphorylation // inferred from electronic annotation
208894_at	M60334	major histocompatibility complex, class II, DR alpha /// major histocompatibility complex, class II, DR alpha	HLA-DRA	3122	6955 // immune response // inferred from electronic annotation /// 6955 // immune response // non-traceable author statement /// 19884 // antigen presentation, exogenous antigen // inferred from electronic annotation /// 19886 // antigen processing, exogenous antigen via MHC class II // inferred from electronic annotation
208937_s_at	D13889	inhibitor of DNA binding 1, dominant negative helix-loop-helix protein	ID1	3397	6357 // regulation of transcription from RNA polymerase II promoter // not recorded /// 7275 // development // inferred from electronic annotation /// 16481 // negative regulation of transcription // inferred from direct assay /// 43433 // negative regulation of transcription factor activity // inferred from direct assay /// 45449 // regulation of transcription // inferred from electronic annotat…
208944_at	D50683	transforming growth factor, beta receptor II (70/80kDa)	TGFBR2	7048	6468 // protein amino acid phosphorylation // inferred from electronic annotation /// 6470 // protein amino acid dephosphorylation // non-traceable author statement /// 7178 // transmembrane receptor protein serine/threonine kinase signaling pathway // inferred from electronic annotation /// 8284 // positive regulation of cell proliferation // traceable author statement
208949_s_at	BC001120	lectin, galactoside-binding, soluble, 3 (galectin 3) /// galectin-3 internal gene	LGALS3 /// GALIG		---
208965_s_at	BG256677	interferon, gamma-inducible protein 16	IFI16	3428	6350 // transcription // inferred from electronic annotation /// 6355 // regulation of transcription, DNA-dependent // non-traceable author statement /// 6955 // immune response // inferred from electronic annotation /// 8283 // cell proliferation // non-traceable author statement /// 9615 // response to virus // non-traceable author statement /// 30224 // monocyte differentiation // inferred fro…
208966_x_at	AF208043	interferon, gamma-inducible protein 16	IFI16	3428	6350 // transcription // inferred from electronic annotation /// 6355 // regulation of transcription, DNA-dependent // non-traceable author statement /// 6955 // immune response // inferred from electronic annotation /// 8283 // cell proliferation // non-traceable author statement /// 9615 // response to virus // non-traceable author statement /// 30224 // monocyte differentiation // inferred fro…
208978_at	U36190	cysteine-rich protein 2	CRIP2	1397	---
208983_s_at	M37780	platelet/endothelial cell adhesion molecule (CD31 antigen)	PECAM1	5175	6928 // cell motility // not recorded /// 7155 // cell adhesion // inferred from electronic annotation /// 7165 // signal transduction // traceable author statement /// 8037 // cell recognition // traceable author statement
209030_s_at	NM_014333	immunoglobulin superfamily, member 4	IGSF4	23705	7156 // homophilic cell adhesion // inferred from sequence or structural similarity /// 7157 // heterophilic cell adhesion // inferred from sequence or structural similarity /// 16338 // calcium-independent cell-cell adhesion // inferred from sequence or structural similarity /// 1913 // T cell mediated cytotoxicity // inferred from direct assay /// 8037 // cell recognition // inferred from direc…
209031_at	AL519710	Immunoglobulin superfamily, member 4	IGSF4	23705	7156 // homophilic cell adhesion // inferred from sequence or structural similarity /// 7157 // heterophilic cell adhesion // inferred from sequence or structural similarity /// 16338 // calcium-independent cell-cell adhesion // inferred from sequence or structural similarity /// 1913 // T cell mediated cytotoxicity // inferred from direct assay /// 8037 // cell recognition // inferred from direc…
209032_s_at	AF132811	immunoglobulin superfamily, member 4	IGSF4	23705	7156 // homophilic cell adhesion // inferred from sequence or structural similarity /// 7157 // heterophilic cell adhesion // inferred from sequence or structural similarity /// 16338 // calcium-independent cell-cell adhesion // inferred from sequence or structural similarity /// 1913 // T cell mediated cytotoxicity // inferred from direct assay /// 8037 // cell recognition // inferred from direc…
209040_s_at	U17496	proteasome (prosome, macropain) subunit, beta type, 8 (large multifunctional peptidase 7)	PSMB8	5696	6508 // proteolysis // not recorded /// 6511 // ubiquitin-dependent protein catabolism // inferred from electronic annotation /// 6955 // immune response // inferred from electronic annotation
209081_s_at	NM_030582	collagen, type XVIII, alpha 1	COL18A1	80781	6817 // phosphate transport // inferred from electronic annotation /// 7155 // cell adhesion // inferred from electronic annotation /// 7601 // visual perception // traceable author statement /// 8285 // negative regulation of cell proliferation // traceable author statement /// 9887 // organ morphogenesis // traceable author statement
209094_at	AL078459	dimethylarginine dimethylaminohydrolase 1	DDAH1	23576	6527 // arginine catabolism // traceable author statement /// 7263 // nitric oxide mediated signal transduction // traceable author statement
209099_x_at	U73936	jagged 1 (Alagille syndrome)	JAG1	182	1525 // angiogenesis // non-traceable author statement /// 1709 // cell fate determination // non-traceable author statement /// 7154 // cell communication // inferred from electronic annotation /// 7219 // Notch signaling pathway // non-traceable author statement /// 7275 // development // non-traceable author statement /// 7399 // nervous system development // non-traceable author statement ///…
209101_at	M92934	connective tissue growth factor	CTGF	1490	1558 // regulation of cell growth // inferred from electronic annotation /// 6260 // DNA replication // inferred from electronic annotation /// 6928 // cell motility // not recorded /// 7155 // cell adhesion // inferred from electronic annotation /// 8544 // epidermis development // traceable author statement /// 9611 // response to wounding // traceable author statement
209119_x_at	AV703465	nuclear receptor subfamily 2, group F, member 2	NR2F2	7026	6350 // transcription // inferred from electronic annotation /// 6357 // regulation of transcription from RNA polymerase II promoter // traceable author statement /// 6629 // lipid metabolism // traceable author statement /// 7165 // signal transduction // traceable author statement /// 6355 // regulation of transcription, DNA-dependent // inferred from electronic annotation
209120_at	AL037401	nuclear receptor subfamily 2, group F, member 2	NR2F2	7026	6350 // transcription // inferred from electronic annotation /// 6357 // regulation of transcription from RNA polymerase II promoter // traceable author statement /// 6629 // lipid metabolism // traceable author statement /// 7165 // signal transduction // traceable author statement /// 6355 // regulation of transcription, DNA-dependent // inferred from electronic annotation
209140_x_at	L42024	major histocompatibility complex, class I, B	HLA-B	3106	19882 // antigen presentation // inferred from electronic annotation /// 19883 // antigen presentation, endogenous antigen // inferred from electronic annotation /// 19885 // antigen processing, endogenous antigen via MHC class I // inferred from electronic annotation /// 6955 // immune response // inferred from electronic annotation /// 6952 // defense response // traceable author statement /// …
209156_s_at	AY029208	collagen, type VI, alpha 2	COL6A2	1292	6817 // phosphate transport // inferred from electronic annotation /// 16337 // cell-cell adhesion // non-traceable author statement /// 30198 // extracellular matrix organization and biogenesis // non-traceable author statement /// 7155 // cell adhesion // inferred from electronic annotation
209159_s_at	AV724216	NDRG family member 4	NDRG4	65009	6950 // response to stress // non-traceable author statement /// 16049 // cell growth // non-traceable author statement /// 30154 // cell differentiation // inferred from electronic annotation /// 30154 // cell differentiation // non-traceable author statement /// 7275 // development // inferred from electronic annotation
209160_at	AB018580	aldo-keto reductase family 1, member C3 (3-alpha hydroxysteroid dehydrogenase, type II)	AKR1C3	8644	6118 // electron transport // traceable author statement /// 6693 // prostaglandin metabolism // traceable author statement
209167_at	AI419030	glycoprotein M6B	GPM6B	2824	7399 // nervous system development // non-traceable author statement /// 30154 // cell differentiation // inferred from electronic annotation /// 7275 // development // inferred from electronic annotation /// 7399 // nervous system development // inferred from electronic annotation
209169_at	N63576	glycoprotein M6B	GPM6B	2824	7399 // nervous system development // non-traceable author statement /// 30154 // cell differentiation // inferred from electronic annotation /// 7275 // development // inferred from electronic annotation /// 7399 // nervous system development // inferred from electronic annotation
209170_s_at	AF016004	glycoprotein M6B	GPM6B	2824	7399 // nervous system development // non-traceable author statement /// 30154 // cell differentiation // inferred from electronic annotation /// 7275 // development // inferred from electronic annotation /// 7399 // nervous system development // inferred from electronic annotation
209183_s_at	AL136653	chromosome 10 open reading frame 10	C10orf10	11067	---
209185_s_at	AF073310	insulin receptor substrate 2	IRS2	8660	6006 // glucose metabolism // traceable author statement /// 7165 // signal transduction // traceable author statement /// 8284 // positive regulation of cell proliferation // not recorded /// 7165 // signal transduction // inferred from electronic annotation
209189_at	BC004490	v-fos FBJ murine osteosarcoma viral oncogene homolog	FOS	2353	6306 // DNA methylation // traceable author statement /// 6357 // regulation of transcription from RNA polymerase II promoter // traceable author statement /// 6954 // inflammatory response // traceable author statement /// 6355 // regulation of transcription, DNA-dependent // inferred from electronic annotation
209198_s_at	BC004291	synaptotagmin XI	SYT11	23208	6810 // transport // inferred from electronic annotation
209199_s_at	N22468	MADS box transcription enhancer factor 2, polypeptide C (myocyte enhancer factor 2C)	MEF2C	4208	6350 // transcription // inferred from electronic annotation /// 6355 // regulation of transcription, DNA-dependent // inferred from electronic annotation /// 6366 // transcription from RNA polymerase II promoter // not recorded /// 7399 // nervous system development // traceable author statement /// 7517 // muscle development // traceable author statement
209200_at	AL536517	MADS box transcription enhancer factor 2, polypeptide C (myocyte enhancer factor 2C)	MEF2C	4208	6350 // transcription // inferred from electronic annotation /// 6355 // regulation of transcription, DNA-dependent // inferred from electronic annotation /// 6366 // transcription from RNA polymerase II promoter // not recorded /// 7399 // nervous system development // traceable author statement /// 7517 // muscle development // traceable author statement
209201_x_at	L01639	chemokine (C-X-C motif) receptor 4	CXCR4	7852	7165 // signal transduction // inferred from electronic annotation /// 7186 // G-protein coupled receptor protein signaling pathway // inferred from electronic annotation
209242_at	AL042588	paternally expressed 3	PEG3	5178	6355 // regulation of transcription, DNA-dependent // inferred from electronic annotation /// 6350 // transcription // inferred from electronic annotation /// 6355 // regulation of transcription, DNA-dependent // non-traceable author statement
209243_s_at	AF208967	paternally expressed 3	PEG3	5178	6355 // regulation of transcription, DNA-dependent // inferred from electronic annotation /// 6350 // transcription // inferred from electronic annotation /// 6355 // regulation of transcription, DNA-dependent // non-traceable author statement
209267_s_at	AB040120	solute carrier family 39 (zinc transporter), member 8	SLC39A8	64116	30001 // metal ion transport // inferred from electronic annotation
209277_at	AL574096	Tissue factor pathway inhibitor 2	TFPI2	7980	7596 // blood coagulation // inferred from electronic annotation
209278_s_at	L27624	tissue factor pathway inhibitor 2	TFPI2	7980	7596 // blood coagulation // inferred from electronic annotation
209283_at	AF007162	crystallin, alpha B	CRYAB	1410	6457 // protein folding // non-traceable author statement /// 6936 // muscle contraction // traceable author statement /// 7169 // transmembrane receptor protein tyrosine kinase signaling pathway // non-traceable author statement /// 7601 // visual perception // not recorded
209286_at	AI754416	CDC42 effector protein (Rho GTPase binding) 3	CDC42EP3	10602	8360 // regulation of cell shape // inferred from electronic annotation
209289_at	AI700518	nuclear factor I/B	NFIB	4781	6260 // DNA replication // inferred from electronic annotation /// 6350 // transcription // inferred from electronic annotation /// 6355 // regulation of transcription, DNA-dependent // inferred from electronic annotation
209290_s_at	BC001283	nuclear factor I/B	NFIB	4781	6260 // DNA replication // inferred from electronic annotation /// 6350 // transcription // inferred from electronic annotation /// 6355 // regulation of transcription, DNA-dependent // inferred from electronic annotation
209291_at	AW157094	inhibitor of DNA binding 4, dominant negative helix-loop-helix protein	ID4	3400	6357 // regulation of transcription from RNA polymerase II promoter // traceable author statement /// 16481 // negative regulation of transcription // inferred from direct assay /// 45449 // regulation of transcription // inferred from electronic annotation
209292_at	AL022726	Inhibitor of DNA binding 4, dominant negative helix-loop-helix protein	ID4	3400	6357 // regulation of transcription from RNA polymerase II promoter // traceable author statement /// 16481 // negative regulation of transcription // inferred from direct assay /// 45449 // regulation of transcription // inferred from electronic annotation
209301_at	M36532	carbonic anhydrase II	CA2	760	6730 // one-carbon compound metabolism // inferred from electronic annotation
209310_s_at	U25804	caspase 4, apoptosis-related cysteine peptidase	CASP4	837	6508 // proteolysis // inferred from electronic annotation /// 6508 // proteolysis // traceable author statement /// 6917 // induction of apoptosis // traceable author statement /// 42981 // regulation of apoptosis // inferred from electronic annotation /// 6915 // apoptosis // inferred from electronic annotation /// 6915 // apoptosis // traceable author statement
209318_x_at	BG547855	pleiomorphic adenoma gene-like 1	PLAGL1	5325	6350 // transcription // inferred from electronic annotation /// 6355 // regulation of transcription, DNA-dependent // inferred from electronic annotation /// 6917 // induction of apoptosis // traceable author statement /// 7050 // cell cycle arrest // traceable author statement /// 45944 // positive regulation of transcription from RNA polymerase II promoter // inferred from direct assay
209324_s_at	BF304996	regulator of G-protein signalling 16	RGS16	6004	7601 // visual perception // traceable author statement /// 8277 // regulation of G-protein coupled receptor protein signaling pathway // traceable author statement /// 9968 // negative regulation of signal transduction // inferred from electronic annotation
209343_at	BC002449	EF-hand domain family, member D1	EFHD1	80303	---
209348_s_at	AF055376	v-maf musculoaponeurotic fibrosarcoma oncogene homolog (avian)	MAF	4094	6350 // transcription // inferred from electronic annotation /// 6355 // regulation of transcription, DNA-dependent // inferred from electronic annotation /// 6366 // transcription from RNA polymerase II promoter // traceable author statement
209355_s_at	AB000889	phosphatidic acid phosphatase type 2B	PPAP2B	8613	6629 // lipid metabolism // non-traceable author statement /// 8354 // germ cell migration // traceable author statement
209356_x_at	AB030655	EGF-containing fibulin-like extracellular matrix protein 2	EFEMP2	30008	7156 // homophilic cell adhesion // inferred from electronic annotation /// 7596 // blood coagulation // inferred from electronic annotation
209360_s_at	D43968	runt-related transcription factor 1 (acute myeloid leukemia 1; aml1 oncogene)	RUNX1	861	6350 // transcription // inferred from electronic annotation /// 6355 // regulation of transcription, DNA-dependent // non-traceable author statement /// 7275 // development // traceable author statement /// 30097 // hemopoiesis // inferred from sequence or structural similarity /// 30854 // positive regulation of granulocyte differentiation // inferred from mutant phenotype /// 45766 // positive…
209367_at	AB002559	syntaxin binding protein 2	STXBP2	6813	6886 // intracellular protein transport // non-traceable author statement /// 6904 // vesicle docking during exocytosis // inferred from electronic annotation /// 16192 // vesicle-mediated transport // inferred from electronic annotation /// 6810 // transport // inferred from electronic annotation /// 15031 // protein transport // inferred from electronic annotation
209368_at	AF233336	epoxide hydrolase 2, cytoplasmic	EPHX2	2053	6800 // oxygen and reactive oxygen species metabolism // non-traceable author statement /// 6805 // xenobiotic metabolism // non-traceable author statement /// 6874 // calcium ion homeostasis // non-traceable author statement /// 6954 // inflammatory response // non-traceable author statement /// 8152 // metabolism // inferred from electronic annotation /// 8217 // blood pressure regulation // no…
209387_s_at	M90657	transmembrane 4 L six family member 1	TM4SF1	4071	---
209392_at	L35594	ectonucleotide pyrophosphatase/phosphodiesterase 2 (autotaxin)	ENPP2	5168	6796 // phosphate metabolism // traceable author statement /// 6928 // cell motility // traceable author statement /// 6935 // chemotaxis // non-traceable author statement /// 7186 // G-protein coupled receptor protein signaling pathway // traceable author statement /// 9117 // nucleotide metabolism // inferred from electronic annotation
209417_s_at	BC001356	interferon-induced protein 35	IFI35	3430	6955 // immune response // non-traceable author statement /// 9615 // response to virus // non-traceable author statement /// 6955 // immune response // inferred from electronic annotation
209448_at	BC002439	HIV-1 Tat interactive protein 2, 30kDa	HTATIP2	10553	7049 // cell cycle // inferred from electronic annotation /// 30154 // cell differentiation // inferred from electronic annotation /// 42981 // regulation of apoptosis // inferred from direct assay /// 45765 // regulation of angiogenesis // inferred from direct assay /// 45786 // negative regulation of progression through cell cycle // inferred from electronic annotation /// 51170 // nuclear impo…
209459_s_at	AF237813	4-aminobutyrate aminotransferase	ABAT	18	7610 // behavior // non-traceable author statement /// 9450 // gamma-aminobutyric acid catabolism // non-traceable author statement /// 42135 // neurotransmitter catabolism // non-traceable author statement /// 48148 // behavioral response to cocaine // inferred from sequence or structural similarity /// 9448 // gamma-aminobutyric acid metabolism // inferred from electronic annotation /// 42135 /…
209460_at	AF237813	4-aminobutyrate aminotransferase	ABAT	18	7610 // behavior // non-traceable author statement /// 9450 // gamma-aminobutyric acid catabolism // non-traceable author statement /// 42135 // neurotransmitter catabolism // non-traceable author statement /// 48148 // behavioral response to cocaine // inferred from sequence or structural similarity /// 9448 // gamma-aminobutyric acid metabolism // inferred from electronic annotation /// 42135 /…
209462_at	U48437	amyloid beta (A4) precursor-like protein 1	APLP1	333	6897 // endocytosis // inferred from electronic annotation /// 6915 // apoptosis // inferred from electronic annotation /// 7155 // cell adhesion // inferred from electronic annotation /// 7399 // nervous system development // traceable author statement /// 8219 // cell death // inferred from electronic annotation /// 9887 // organ morphogenesis // traceable author statement
209465_x_at	AL565812	pleiotrophin (heparin binding growth factor 8, neurite growth-promoting factor 1)	PTN	5764	74 // regulation of progression through cell cycle // inferred from electronic annotation /// 7185 // transmembrane receptor protein tyrosine phosphatase signaling pathway // traceable author statement /// 7399 // nervous system development // traceable author statement /// 8283 // cell proliferation // inferred from electronic annotation /// 8284 // positive regulation of cell proliferation // t…
209466_x_at	M57399	pleiotrophin (heparin binding growth factor 8, neurite growth-promoting factor 1)	PTN	5764	74 // regulation of progression through cell cycle // inferred from electronic annotation /// 7185 // transmembrane receptor protein tyrosine phosphatase signaling pathway // traceable author statement /// 7399 // nervous system development // traceable author statement /// 8283 // cell proliferation // inferred from electronic annotation /// 8284 // positive regulation of cell proliferation // t…
209469_at	BF939489	glycoprotein M6A	GPM6A	2823	---
209470_s_at	D49958	glycoprotein M6A	GPM6A	2823	---
209487_at	D84109	RNA binding protein with multiple splicing	RBPMS	11030	6396 // RNA processing // traceable author statement
209488_s_at	D84109	RNA binding protein with multiple splicing	RBPMS	11030	6396 // RNA processing // traceable author statement
209493_at	AF338650	PDZ domain containing 2	PDZD2	23037	7155 // cell adhesion // inferred from electronic annotation
209496_at	BC000069	retinoic acid receptor responder (tazarotene induced) 2	RARRES2	5919	1523 // retinoid metabolism // inferred from direct assay
209504_s_at	AF081583	pleckstrin homology domain containing, family B (evectins) member 1	PLEKHB1	58473	7602 // phototransduction // non-traceable author statement
209505_at	AI951185	Nuclear receptor subfamily 2, group F, member 1	NR2F1	7025	6350 // transcription // inferred from electronic annotation /// 6355 // regulation of transcription, DNA-dependent // inferred from electronic annotation /// 7165 // signal transduction // traceable author statement
209529_at	AF047760	phosphatidic acid phosphatase type 2C	PPAP2C	8612	---
209539_at	D25304	Rac/Cdc42 guanine nucleotide exchange factor (GEF) 6	ARHGEF6	9459	6915 // apoptosis // non-traceable author statement /// 7254 // JNK cascade // non-traceable author statement /// 35023 // regulation of Rho protein signal transduction // inferred from electronic annotation /// 31032 // actomyosin structure organization and biogenesis // inferred from electronic annotation
209560_s_at	U15979	delta-like 1 homolog (Drosophila)	DLK1	8788	7275 // development // traceable author statement
209569_x_at	NM_014392	DNA segment on chromosome 4 (unique) 234 expressed sequence	D4S234E	27065	7212 // dopamine receptor signaling pathway // inferred from electronic annotation
209581_at	BC001387	HRAS-like suppressor 3	HRASLS3	11145	7049 // cell cycle // inferred from electronic annotation /// 45786 // negative regulation of progression through cell cycle // inferred from electronic annotation
209582_s_at	H23979	CD200 molecule	CD200	4345	---
209583_s_at	AF063591	CD200 molecule	CD200	4345	---
209590_at	AL157414	Bone morphogenetic protein 7 (osteogenic protein 1)	BMP7	655	1503 // ossification // inferred from electronic annotation /// 30154 // cell differentiation // inferred from electronic annotation /// 40007 // growth // inferred from electronic annotation /// 51216 // cartilage development // inferred from electronic annotation /// 7275 // development // inferred from electronic annotation /// 1501 // skeletal development // traceable author statement
209591_s_at	M60316	bone morphogenetic protein 7 (osteogenic protein 1)	BMP7	655	1503 // ossification // inferred from electronic annotation /// 30154 // cell differentiation // inferred from electronic annotation /// 40007 // growth // inferred from electronic annotation /// 51216 // cartilage development // inferred from electronic annotation /// 7275 // development // inferred from electronic annotation /// 1501 // skeletal development // traceable author statement
209598_at	AB020690	paraneoplastic antigen MA2	PNMA2	10687	---
209602_s_at	AI796169	GATA binding protein 3	GATA3	2625	6350 // transcription // inferred from electronic annotation /// 6355 // regulation of transcription, DNA-dependent // inferred from electronic annotation /// 6366 // transcription from RNA polymerase II promoter // traceable author statement /// 6952 // defense response // traceable author statement /// 7605 // sensory perception of sound // inferred from electronic annotation /// 9653 // morpho…
209603_at	AI796169	GATA binding protein 3	GATA3	2625	6350 // transcription // inferred from electronic annotation /// 6355 // regulation of transcription, DNA-dependent // inferred from electronic annotation /// 6366 // transcription from RNA polymerase II promoter // traceable author statement /// 6952 // defense response // traceable author statement /// 7605 // sensory perception of sound // inferred from electronic annotation /// 9653 // morpho…
209604_s_at	BC003070	GATA binding protein 3	GATA3	2625	6350 // transcription // inferred from electronic annotation /// 6355 // regulation of transcription, DNA-dependent // inferred from electronic annotation /// 6366 // transcription from RNA polymerase II promoter // traceable author statement /// 6952 // defense response // traceable author statement /// 7605 // sensory perception of sound // inferred from electronic annotation /// 9653 // morpho…
209621_s_at	AF002280	PDZ and LIM domain 3	PDLIM3	27295	---
209631_s_at	U87460	G protein-coupled receptor 37 (endothelin receptor type B-like)	GPR37	2861	7165 // signal transduction // inferred from electronic annotation /// 7186 // G-protein coupled receptor protein signaling pathway // traceable author statement /// 7186 // G-protein coupled receptor protein signaling pathway // inferred from electronic annotation
209644_x_at	U38945	cyclin-dependent kinase inhibitor 2A (melanoma, p16, inhibits CDK4)	CDKN2A	1029	75 // cell cycle checkpoint // traceable author statement /// 79 // regulation of cyclin-dependent protein kinase activity // traceable author statement /// 6350 // transcription // inferred from electronic annotation /// 6355 // regulation of transcription, DNA-dependent // inferred from electronic annotation /// 6364 // rRNA processing // inferred from electronic annotation /// 6915 // apoptosi…
209652_s_at	BC001422	placental growth factor, vascular endothelial growth factor-related protein	PGF	5228	74 // regulation of progression through cell cycle // inferred from electronic annotation /// 1525 // angiogenesis // inferred from electronic annotation /// 7165 // signal transduction // traceable author statement /// 7267 // cell-cell signaling // traceable author statement /// 8283 // cell proliferation // inferred from electronic annotation /// 8284 // positive regulation of cell proliferati…
209655_s_at	AI803181	transmembrane protein 47	TMEM47	83604	---
209656_s_at	AL136550	transmembrane protein 47	TMEM47	83604	---
209663_s_at	AF072132	integrin, alpha 7	ITGA7	3679	7155 // cell adhesion // inferred from electronic annotation /// 7156 // homophilic cell adhesion // not recorded /// 7160 // cell-matrix adhesion // traceable author statement /// 7229 // integrin-mediated signaling pathway // inferred from electronic annotation /// 7517 // muscle development // traceable author statement /// 8360 // regulation of cell shape // inferred from electronic annotation
209670_at	M12959	T cell receptor alpha constant /// T cell receptor alpha constant	TRAC	28755	---
209671_x_at	M12423	T cell receptor alpha locus /// T cell receptor alpha locus /// T cell receptor alpha constant /// T cell receptor alpha constant	TRA@ /// TRAC		6968 // cellular defense response // non-traceable author statement /// 6955 // immune response // non-traceable author statement
209676_at	J03225	tissue factor pathway inhibitor (lipoprotein-associated coagulation inhibitor)	TFPI	7035	7596 // blood coagulation // inferred from electronic annotation /// 7596 // blood coagulation // traceable author statement
209683_at	AA243659	family with sequence similarity 49, member A	FAM49A	81553	---
209684_at	AL136924	Ras and Rab interactor 2	RIN2	54453	6897 // endocytosis // inferred from electronic annotation /// 7264 // small GTPase mediated signal transduction // non-traceable author statement /// 7165 // signal transduction // inferred from electronic annotation /// 7242 // intracellular signaling cascade // inferred from electronic annotation
209685_s_at	M13975	protein kinase C, beta 1	PRKCB1	5579	6468 // protein amino acid phosphorylation // traceable author statement /// 7242 // intracellular signaling cascade // inferred from electronic annotation /// 6468 // protein amino acid phosphorylation // inferred from electronic annotation /// 7165 // signal transduction // non-traceable author statement
209687_at	U19495	chemokine (C-X-C motif) ligand 12 (stromal cell-derived factor 1)	CXCL12	6387	6874 // calcium ion homeostasis // traceable author statement /// 6935 // chemotaxis // traceable author statement /// 6954 // inflammatory response // not recorded /// 6955 // immune response // inferred from electronic annotation /// 7155 // cell adhesion // traceable author statement /// 7165 // signal transduction // traceable author statement /// 7186 // G-protein coupled receptor protein si…
209699_x_at	U05598	aldo-keto reductase family 1, member C2 (dihydrodiol dehydrogenase 2; bile acid binding protein; 3-alpha hydroxysteroid dehydrogenase, type III)	AKR1C2	1646	6629 // lipid metabolism // inferred from electronic annotation /// 6693 // prostaglandin metabolism // inferred from direct assay /// 7586 // digestion // inferred from direct assay /// 8202 // steroid metabolism // inferred from direct assay /// 6118 // electron transport // inferred from direct assay /// 8206 // bile acid metabolism // inferred from direct assay /// 51260 // protein homooligom…
209708_at	AY007239	monooxygenase, DBH-like 1	MOXD1	26002	6584 // catecholamine metabolism // inferred from electronic annotation /// 6548 // histidine catabolism // inferred from electronic annotation
209710_at	AL563460	GATA binding protein 2	GATA2	2624	6350 // transcription // inferred from electronic annotation /// 6355 // regulation of transcription, DNA-dependent // inferred from electronic annotation /// 6366 // transcription from RNA polymerase II promoter // traceable author statement /// 6909 // phagocytosis // inferred from electronic annotation /// 50766 // positive regulation of phagocytosis // inferred from sequence or structural sim…
209720_s_at	BC005224	serpin peptidase inhibitor, clade B (ovalbumin), member 3	SERPINB3	6317	---
209723_at	BC002538	serpin peptidase inhibitor, clade B (ovalbumin), member 9	SERPINB9	5272	6916 // anti-apoptosis // traceable author statement /// 7165 // signal transduction // traceable author statement
209732_at	BC005254	C-type lectin domain family 2, member B	CLEC2B	9976	19735 // antimicrobial humoral response (sensu Vertebrata) // traceable author statement
209734_at	BC001604	NCK-associated protein 1-like	NCKAP1L	3071	---
209739_s_at	AI814551	patatin-like phospholipase domain containing 4	PNPLA4	8228	6629 // lipid metabolism // inferred from electronic annotation
209740_s_at	U03886	patatin-like phospholipase domain containing 4	PNPLA4	8228	6629 // lipid metabolism // inferred from electronic annotation
209757_s_at	BC002712	v-myc myelocytomatosis viral related oncogene, neuroblastoma derived (avian)	MYCN	4613	6357 // regulation of transcription from RNA polymerase II promoter // traceable author statement /// 6355 // regulation of transcription, DNA-dependent // inferred from electronic annotation /// 45449 // regulation of transcription // inferred from electronic annotation
209763_at	AL049176	chordin-like 1	CHRDL1	91851	7399 // nervous system development // inferred from electronic annotation /// 30154 // cell differentiation // inferred from electronic annotation /// 7275 // development // inferred from electronic annotation
209771_x_at	AA761181	CD24 molecule	CD24	934	6959 // humoral immune response // traceable author statement
209772_s_at	X69397	CD24 molecule	CD24	934	6959 // humoral immune response // traceable author statement
209789_at	BF939649	coronin, actin binding protein, 2B	CORO2B	10391	30036 // actin cytoskeleton organization and biogenesis // non-traceable author statement
209795_at	L07555	CD69 molecule	CD69	969	6952 // defense response // not recorded /// 7166 // cell surface receptor linked signal transduction // not recorded
209823_x_at	M17955	major histocompatibility complex, class II, DQ beta 1	HLA-DQB1	3119	6955 // immune response // inferred from electronic annotation /// 6955 // immune response // non-traceable author statement /// 19884 // antigen presentation, exogenous antigen // inferred from electronic annotation /// 19886 // antigen processing, exogenous antigen via MHC class II // inferred from electronic annotation
209829_at	AB002384	chromosome 6 open reading frame 32	C6orf32	9750	---
209835_x_at	BC004372	CD44 molecule (Indian blood group)	CD44	960	7155 // cell adhesion // inferred from electronic annotation /// 7160 // cell-matrix adhesion // non-traceable author statement /// 16337 // cell-cell adhesion // non-traceable author statement
209840_s_at	AI221950	leucine rich repeat neuronal 3	LRRN3	54674	---
209841_s_at	AL442092	leucine rich repeat neuronal 3	LRRN3	54674	---
209866_s_at	R50822	latrophilin 3	LPHN3	23284	7165 // signal transduction // inferred from electronic annotation /// 7218 // neuropeptide signaling pathway // inferred from electronic annotation /// 7186 // G-protein coupled receptor protein signaling pathway // inferred from electronic annotation /// 7186 // G-protein coupled receptor protein signaling pathway // traceable author statement /// 7186 // G-protein coupled receptor protein sign…
209867_s_at	AF307080	latrophilin 3	LPHN3	23284	7165 // signal transduction // inferred from electronic annotation /// 7218 // neuropeptide signaling pathway // inferred from electronic annotation /// 7186 // G-protein coupled receptor protein signaling pathway // inferred from electronic annotation /// 7186 // G-protein coupled receptor protein signaling pathway // traceable author statement /// 7186 // G-protein coupled receptor protein sign…
209869_at	AF284095	adrenergic, alpha-2A-, receptor /// adrenergic, alpha-2A-, receptor	ADRA2A	150	187 // activation of MAPK activity // traceable author statement /// 6928 // cell motility // traceable author statement /// 7165 // signal transduction // traceable author statement /// 7186 // G-protein coupled receptor protein signaling pathway // traceable author statement /// 7194 // negative regulation of adenylate cyclase activity // traceable author statement /// 7265 // Ras protein signa…
209871_s_at	AB014719	amyloid beta (A4) precursor protein-binding, family A, member 2 (X11-like)	APBA2	321	7399 // nervous system development // traceable author statement /// 15031 // protein transport // inferred from electronic annotation /// 6810 // transport // inferred from electronic annotation
209897_s_at	AF055585	slit homolog 2 (Drosophila)	SLIT2	9353	1657 // ureteric bud development // inferred from mutant phenotype /// 6935 // chemotaxis // inferred from electronic annotation /// 7186 // G-protein coupled receptor protein signaling pathway // inferred from electronic annotation /// 7399 // nervous system development // traceable author statement /// 7509 // mesoderm migration // inferred from mutant phenotype /// 7608 // sensory perception o…
209909_s_at	M19154	---	---		---
209914_s_at	AW149405	neurexin 1	NRXN1	9378	7155 // cell adhesion // inferred from electronic annotation /// 7411 // axon guidance // traceable author statement
209915_s_at	AB035356	neurexin 1	NRXN1	9378	7155 // cell adhesion // inferred from electronic annotation /// 7411 // axon guidance // traceable author statement
209942_x_at	BC000340	melanoma antigen family A, 3	MAGEA3	4102	---
209955_s_at	U76833	fibroblast activation protein, alpha	FAP	2191	6508 // proteolysis // inferred from electronic annotation
209960_at	X16323	hepatocyte growth factor (hepapoietin A; scatter factor)	HGF	3082	6508 // proteolysis // inferred from electronic annotation /// 7067 // mitosis // non-traceable author statement /// 7596 // blood coagulation // inferred from electronic annotation
209968_s_at	U63041	neural cell adhesion molecule 1	NCAM1	4684	7155 // cell adhesion // inferred from electronic annotation /// 7155 // cell adhesion // non-traceable author statement /// 7267 // cell-cell signaling // not recorded /// 7268 // synaptic transmission // not recorded /// 7399 // nervous system development // inferred from electronic annotation /// 30154 // cell differentiation // inferred from electronic annotation /// 7275 // development // in…
209987_s_at	BC002341	achaete-scute complex-like 1 (Drosophila)	ASCL1	429	6357 // regulation of transcription from RNA polymerase II promoter // not recorded /// 7399 // nervous system development // inferred from electronic annotation /// 30154 // cell differentiation // inferred from electronic annotation /// 45449 // regulation of transcription // inferred from electronic annotation /// 7275 // development // inferred from electronic annotation
209988_s_at	BC001638	achaete-scute complex-like 1 (Drosophila)	ASCL1	429	6357 // regulation of transcription from RNA polymerase II promoter // not recorded /// 7399 // nervous system development // inferred from electronic annotation /// 30154 // cell differentiation // inferred from electronic annotation /// 45449 // regulation of transcription // inferred from electronic annotation /// 7275 // development // inferred from electronic annotation
209993_at	AF016535	ATP-binding cassette, sub-family B (MDR/TAP), member 1	ABCB1	5243	6810 // transport // traceable author statement /// 42493 // response to drug // traceable author statement /// 6810 // transport // inferred from electronic annotation
210015_s_at	U89330	microtubule-associated protein 2	MAP2	4133	7026 // negative regulation of microtubule depolymerization // inferred from electronic annotation /// 7026 // negative regulation of microtubule depolymerization // not recorded
210016_at	BF223003	myelin transcription factor 1-like	MYT1L	23040	6350 // transcription // inferred from electronic annotation /// 6355 // regulation of transcription, DNA-dependent // inferred from electronic annotation /// 7399 // nervous system development // inferred from electronic annotation /// 30154 // cell differentiation // inferred from electronic annotation /// 7275 // development // inferred from electronic annotation
210026_s_at	AY028896	caspase recruitment domain family, member 10	CARD10	29775	6461 // protein complex assembly // non-traceable author statement /// 7250 // activation of NF-kappaB-inducing kinase // inferred from direct assay /// 42981 // regulation of apoptosis // inferred from electronic annotation /// 6461 // protein complex assembly // inferred from sequence or structural similarity /// 7250 // activation of NF-kappaB-inducing kinase // inferred from sequence or struc…
210038_at	AL137145	protein kinase C, theta	PRKCQ	5588	1558 // regulation of cell growth // non-traceable author statement /// 6468 // protein amino acid phosphorylation // inferred from electronic annotation /// 6468 // protein amino acid phosphorylation // non-traceable author statement /// 7242 // intracellular signaling cascade // inferred from electronic annotation /// 7242 // intracellular signaling cascade // non-traceable author statement ///…
210067_at	D63412	aquaporin 4	AQP4	361	6810 // transport // inferred from electronic annotation /// 6810 // transport // traceable author statement /// 6833 // water transport // non-traceable author statement /// 7399 // nervous system development // traceable author statement /// 7588 // excretion // traceable author statement
210073_at	L32867	ST8 alpha-N-acetyl-neuraminide alpha-2,8-sialyltransferase 1	ST8SIA1	6489	5975 // carbohydrate metabolism // traceable author statement /// 6486 // protein amino acid glycosylation // inferred from electronic annotation /// 6688 // glycosphingolipid biosynthesis // traceable author statement
210090_at	AF193421	activity-regulated cytoskeleton-associated protein	ARC	23237	---
210091_s_at	U46745	dystrobrevin, alpha	DTNA	1837	6941 // striated muscle contraction // traceable author statement /// 7165 // signal transduction // traceable author statement /// 7274 // neuromuscular synaptic transmission // traceable author statement /// 7268 // synaptic transmission // traceable author statement /// 6355 // regulation of transcription, DNA-dependent // inferred from electronic annotation
210095_s_at	M31159	insulin-like growth factor binding protein 3	IGFBP3	3486	1558 // regulation of cell growth // inferred from electronic annotation /// 9968 // negative regulation of signal transduction // non-traceable author statement /// 43065 // positive regulation of apoptosis // inferred from mutant phenotype /// 45663 // positive regulation of myoblast differentiation // inferred from direct assay
210121_at	AF288390	UDP-Gal:betaGlcNAc beta 1,3-galactosyltransferase, polypeptide 2	B3GALT2	8707	6486 // protein amino acid glycosylation // traceable author statement /// 6486 // protein amino acid glycosylation // inferred from electronic annotation
210123_s_at	U62436	cholinergic receptor, nicotinic, alpha 7 /// CHRNA7 (cholinergic receptor, nicotinic, alpha 7, exons 5-10) and FAM7A (family with sequence similarity 7A, exons A-E) fusion /// similar to CHRNA7-FAM7A fusion isoform 1	CHRNA7 /// CHRFAM7A /// LOC652740		187 // activation of MAPK activity // traceable author statement /// 6811 // ion transport // inferred from electronic annotation /// 7165 // signal transduction // non-traceable author statement /// 7268 // synaptic transmission // not recorded /// 6810 // transport // inferred from electronic annotation /// 6810 // transport // traceable author statement
210127_at	BC002510	RAB6B, member RAS oncogene family	RAB6B	51560	6888 // ER to Golgi vesicle-mediated transport // inferred from electronic annotation /// 6890 // retrograde vesicle-mediated transport, Golgi to ER // non-traceable author statement /// 7264 // small GTPase mediated signal transduction // inferred from electronic annotation /// 15031 // protein transport // inferred from electronic annotation /// 6810 // transport // inferred from electronic ann…
210135_s_at	AF022654	short stature homeobox 2	SHOX2	6474	1501 // skeletal development // traceable author statement /// 6355 // regulation of transcription, DNA-dependent // inferred from electronic annotation /// 7275 // development // inferred from electronic annotation /// 7399 // nervous system development // traceable author statement /// 7507 // heart development // traceable author statement /// 45449 // regulation of transcription // inferred f…
210136_at	AW070431	myelin basic protein	MBP	4155	6955 // immune response // traceable author statement /// 7268 // synaptic transmission // traceable author statement /// 7417 // central nervous system development // traceable author statement /// 8366 // nerve ensheathment // traceable author statement
210138_at	AF074979	regulator of G-protein signalling 20	RGS20	8601	8277 // regulation of G-protein coupled receptor protein signaling pathway // traceable author statement /// 9968 // negative regulation of signal transduction // inferred from electronic annotation
210139_s_at	L03203	peripheral myelin protein 22	PMP22	5376	7268 // synaptic transmission // traceable author statement /// 7422 // peripheral nervous system development // traceable author statement /// 7605 // sensory perception of sound // inferred from electronic annotation /// 7638 // mechanosensory behavior // inferred from electronic annotation /// 8285 // negative regulation of cell proliferation // not recorded
210145_at	M68874	phospholipase A2, group IVA (cytosolic, calcium-dependent)	PLA2G4A	5321	6663 // platelet activating factor biosynthesis // non-traceable author statement /// 6690 // icosanoid metabolism // non-traceable author statement /// 9395 // phospholipid catabolism // inferred from electronic annotation /// 16042 // lipid catabolism // inferred from electronic annotation
210146_x_at	AF004231	leukocyte immunoglobulin-like receptor, subfamily B (with TM and ITIM domains), member 2	LILRB2	10288	6968 // cellular defense response // traceable author statement /// 7166 // cell surface receptor linked signal transduction // traceable author statement /// 7267 // cell-cell signaling // traceable author statement /// 19735 // antimicrobial humoral response (sensu Vertebrata) // traceable author statement /// 6955 // immune response // inferred from electronic annotation /// 6952 // defense re…
210170_at	BC001017	PDZ and LIM domain 3	PDLIM3	27295	---
210192_at	AB013452	ATPase, aminophospholipid transporter (APLT), Class I, type 8A, member 1	ATP8A1	10396	6812 // cation transport // inferred from electronic annotation /// 8152 // metabolism // inferred from electronic annotation /// 15917 // aminophospholipid transport // non-traceable author statement
210218_s_at	U36501	SP100 nuclear antigen	SP100	6672	6355 // regulation of transcription, DNA-dependent // traceable author statement /// 6355 // regulation of transcription, DNA-dependent // inferred from electronic annotation
210222_s_at	BC000314	reticulon 1	RTN1	6252	7165 // signal transduction // non-traceable author statement /// 30182 // neuron differentiation // traceable author statement
210233_at	AF167343	interleukin 1 receptor accessory protein	IL1RAP	3556	6461 // protein complex assembly // traceable author statement /// 6954 // inflammatory response // traceable author statement /// 6955 // immune response // traceable author statement
210258_at	AF030107	regulator of G-protein signalling 13	RGS13	6003	9968 // negative regulation of signal transduction // inferred from electronic annotation
210279_at	AF261135	G protein-coupled receptor 18	GPR18	2841	7165 // signal transduction // inferred from electronic annotation /// 7186 // G-protein coupled receptor protein signaling pathway // inferred from electronic annotation /// 7186 // G-protein coupled receptor protein signaling pathway // non-traceable author statement
210303_at	AF262032	mab-21-like 2 (C. elegans)	MAB21L2	10586	7399 // nervous system development // traceable author statement
210305_at	AB042557	phosphodiesterase 4D interacting protein (myomegalin)	PDE4DIP	9659	6412 // protein biosynthesis // inferred from electronic annotation /// 7010 // cytoskeleton organization and biogenesis // inferred from electronic annotation /// 30036 // actin cytoskeleton organization and biogenesis // inferred from electronic annotation
210372_s_at	AF208012	tumor protein D52-like 1	TPD52L1	7164	86 // G2/M transition of mitotic cell cycle // inferred from direct assay /// 6309 // DNA fragmentation during apoptosis // inferred from direct assay /// 6917 // induction of apoptosis // inferred from direct assay /// 43406 // positive regulation of MAPK activity // inferred from direct assay /// 46330 // positive regulation of JNK cascade // inferred from direct assay
210393_at	AF062006	leucine-rich repeat-containing G protein-coupled receptor 5	LGR5	8549	7165 // signal transduction // inferred from electronic annotation /// 7186 // G-protein coupled receptor protein signaling pathway // traceable author statement /// 7186 // G-protein coupled receptor protein signaling pathway // inferred from electronic annotation
210432_s_at	AF225986	sodium channel, voltage-gated, type III, alpha	SCN3A	6328	6811 // ion transport // inferred from electronic annotation /// 6814 // sodium ion transport // non-traceable author statement /// 6814 // sodium ion transport // inferred from electronic annotation /// 6810 // transport // inferred from electronic annotation /// 6813 // potassium ion transport // inferred from electronic annotation
210445_at	U19869	fatty acid binding protein 6, ileal (gastrotropin)	FABP6	2172	6629 // lipid metabolism // non-traceable author statement /// 6810 // transport // inferred from electronic annotation /// 8285 // negative regulation of cell proliferation // traceable author statement
210448_s_at	U49396	purinergic receptor P2X, ligand-gated ion channel, 5	P2RX5	5026	6811 // ion transport // inferred from electronic annotation /// 6810 // transport // inferred from electronic annotation /// 6810 // transport // traceable author statement /// 7165 // signal transduction // traceable author statement /// 7399 // nervous system development // traceable author statement
210467_x_at	BC003408	melanoma antigen family A, 12	MAGEA12	4111	---
210495_x_at	AF130095	fibronectin 1	FN1	2335	6953 // acute-phase response // inferred from electronic annotation /// 7155 // cell adhesion // non-traceable author statement /// 7169 // transmembrane receptor protein tyrosine kinase signaling pathway // non-traceable author statement /// 8152 // metabolism // inferred from electronic annotation /// 9611 // response to wounding // non-traceable author statement /// 16477 // cell migration // …
210497_x_at	BC002818	synovial sarcoma, X breakpoint 2 /// similar to synovial sarcoma, X breakpoint 2 isoform b	SSX2 /// LOC653088		6350 // transcription // inferred from electronic annotation /// 6355 // regulation of transcription, DNA-dependent // non-traceable author statement /// 6355 // regulation of transcription, DNA-dependent // inferred from electronic annotation
210508_s_at	D82346	potassium voltage-gated channel, KQT-like subfamily, member 2	KCNQ2	3785	6811 // ion transport // inferred from electronic annotation /// 6813 // potassium ion transport // inferred from electronic annotation /// 6813 // potassium ion transport // traceable author statement /// 7268 // synaptic transmission // traceable author statement /// 7399 // nervous system development // traceable author statement /// 6810 // transport // inferred from electronic annotation
210510_s_at	AF145712	neuropilin 1	NRP1	8829	1525 // angiogenesis // inferred from electronic annotation /// 7155 // cell adhesion // inferred from electronic annotation /// 7165 // signal transduction // traceable author statement /// 7267 // cell-cell signaling // traceable author statement /// 7399 // nervous system development // inferred from electronic annotation /// 7411 // axon guidance // traceable author statement /// 8284 // posi…
210538_s_at	U37546	baculoviral IAP repeat-containing 3	BIRC3	330	6916 // anti-apoptosis // traceable author statement /// 7166 // cell surface receptor linked signal transduction // traceable author statement /// 42981 // regulation of apoptosis // inferred from electronic annotation /// 6915 // apoptosis // inferred from electronic annotation /// 6916 // anti-apoptosis // inferred from electronic annotation
210547_x_at	L21181	islet cell autoantigen 1, 69kDa	ICA1	3382	6836 // neurotransmitter transport // inferred from electronic annotation /// 46928 // regulation of neurotransmitter secretion // inferred from sequence or structural similarity /// 6810 // transport // inferred from electronic annotation
210571_s_at	AF074480	cytidine monophosphate-N-acetylneuraminic acid hydroxylase (CMP-N-acetylneuraminate monooxygenase)	CMAH	8418	---
210612_s_at	AF318616	synaptojanin 2	SYNJ2	8871	---
210629_x_at	AF000425	leukocyte specific transcript 1	LST1	7940	902 // cellular morphogenesis // inferred from electronic annotation /// 6955 // immune response // inferred from electronic annotation /// 6955 // immune response // non-traceable author statement /// 8360 // regulation of cell shape // inferred from electronic annotation /// 16358 // dendrite development // inferred from direct assay /// 50672 // negative regulation of lymphocyte proliferation …
210662_at	BC000879	kynureninase (L-kynurenine hydrolase)	KYNU	8942	6569 // tryptophan catabolism // inferred from electronic annotation /// 8152 // metabolism // inferred from electronic annotation /// 9435 // NAD biosynthesis // inferred from electronic annotation /// 19363 // pyridine nucleotide biosynthesis // inferred from electronic annotation /// 6569 // tryptophan catabolism // not recorded
210664_s_at	AF021834	tissue factor pathway inhibitor (lipoprotein-associated coagulation inhibitor)	TFPI	7035	7596 // blood coagulation // inferred from electronic annotation /// 7596 // blood coagulation // traceable author statement
210665_at	AF021834	tissue factor pathway inhibitor (lipoprotein-associated coagulation inhibitor)	TFPI	7035	7596 // blood coagulation // inferred from electronic annotation /// 7596 // blood coagulation // traceable author statement
210674_s_at	AF152308	protocadherin alpha 9 /// protocadherin alpha subfamily C, 2 /// protocadherin alpha subfamily C, 1 /// protocadherin alpha 13 /// protocadherin alpha 12 /// protocadherin alpha 11 /// protocadherin alpha 10 /// protocadherin alpha 8 /// protocadherin alpha 7 /// protocadherin alpha 6 /// protocadherin alpha 5 /// protocadherin alpha 4 /// protocadherin alpha 3 /// protocadherin alpha 2 /// proto…	PCDHA9 /// PCDHAC2 /// PCDHAC1 /// PCDHA13 /// PCDHA12 /// PCDHA11 /// PCDHA10 /// PCDHA8 /// PCDHA7 /// PCDHA6 /// PCDHA5 /// PCDHA4 /// PCDHA3 /// PCDHA2 /// PCDHA1		7155 // cell adhesion // inferred from electronic annotation /// 7156 // homophilic cell adhesion // inferred from electronic annotation /// 7155 // cell adhesion // traceable author statement /// 7399 // nervous system development // traceable author statement
210675_s_at	U77917	protein tyrosine phosphatase, receptor type, R	PTPRR	5801	1701 // embryonic development (sensu Mammalia) // inferred from expression pattern /// 6470 // protein amino acid dephosphorylation // traceable author statement /// 6470 // protein amino acid dephosphorylation // inferred from electronic annotation
210683_at	AL161995	neurturin	NRTN	4902	165 // MAPKKK cascade // traceable author statement /// 7169 // transmembrane receptor protein tyrosine kinase signaling pathway // traceable author statement /// 7399 // nervous system development // traceable author statement
210697_at	AF070651	zinc finger protein 257	ZNF257	113835	6350 // transcription // inferred from electronic annotation /// 6355 // regulation of transcription, DNA-dependent // non-traceable author statement /// 6355 // regulation of transcription, DNA-dependent // inferred from electronic annotation
210715_s_at	AF027205	serine peptidase inhibitor, Kunitz type, 2	SPINT2	10653	6928 // cell motility // traceable author statement
210729_at	U32500	neuropeptide Y receptor Y2	NPY2R	4887	7165 // signal transduction // inferred from electronic annotation /// 7186 // G-protein coupled receptor protein signaling pathway // inferred from electronic annotation /// 7193 // G-protein signaling, adenylate cyclase inhibiting pathway // traceable author statement /// 7623 // circadian rhythm // not recorded /// 7626 // locomotory behavior // traceable author statement /// 7631 // feeding b…
210738_s_at	AF011390	solute carrier family 4, sodium bicarbonate cotransporter, member 4	SLC4A4	8671	6814 // sodium ion transport // inferred from electronic annotation /// 6820 // anion transport // inferred from electronic annotation /// 6810 // transport // inferred from electronic annotation /// 6811 // ion transport // inferred from electronic annotation
210754_s_at	M79321	v-yes-1 Yamaguchi sarcoma viral related oncogene homolog	LYN	4067	6468 // protein amino acid phosphorylation // traceable author statement /// 7242 // intracellular signaling cascade // inferred from electronic annotation /// 8284 // positive regulation of cell proliferation // inferred from sequence or structural similarity /// 9725 // response to hormone stimulus // inferred from sequence or structural similarity /// 30218 // erythrocyte differentiation // in…
210755_at	U46010	hepatocyte growth factor (hepapoietin A; scatter factor)	HGF	3082	6508 // proteolysis // inferred from electronic annotation /// 7067 // mitosis // non-traceable author statement /// 7596 // blood coagulation // inferred from electronic annotation
210757_x_at	AF188298	disabled homolog 2, mitogen-responsive phosphoprotein (Drosophila)	DAB2	1601	8283 // cell proliferation // traceable author statement /// 6955 // immune response // inferred from electronic annotation /// 6957 // complement activation, alternative pathway // inferred from electronic annotation /// 6958 // complement activation, classical pathway // inferred from electronic annotation /// 19835 // cytolysis // inferred from electronic annotation /// 45087 // innate immune …
210762_s_at	AF026219	deleted in liver cancer 1	DLC1	10395	7010 // cytoskeleton organization and biogenesis // non-traceable author statement /// 7165 // signal transduction // traceable author statement /// 30155 // regulation of cell adhesion // non-traceable author statement /// 30308 // negative regulation of cell growth // inferred from direct assay /// 7165 // signal transduction // inferred from electronic annotation
210764_s_at	AF003114	cysteine-rich, angiogenic inducer, 61	CYR61	3491	1558 // regulation of cell growth // inferred from electronic annotation /// 6935 // chemotaxis // inferred from electronic annotation /// 7155 // cell adhesion // inferred from electronic annotation /// 8283 // cell proliferation // traceable author statement /// 9653 // morphogenesis // traceable author statement
210786_s_at	M93255	Friend leukemia virus integration 1	FLI1	2313	6350 // transcription // inferred from electronic annotation /// 6355 // regulation of transcription, DNA-dependent // inferred from electronic annotation /// 7599 // hemostasis // traceable author statement /// 9887 // organ morphogenesis // traceable author statement
210794_s_at	AF119863	maternally expressed 3 /// similar to maternally expressed 3	MEG3 /// LOC647251		---
210809_s_at	D13665	periostin, osteoblast specific factor	POSTN	10631	1501 // skeletal development // traceable author statement /// 7155 // cell adhesion // inferred from direct assay /// 7155 // cell adhesion // inferred from electronic annotation
210815_s_at	U17473	calcitonin receptor-like	CALCRL	10203	7165 // signal transduction // inferred from electronic annotation /// 7187 // G-protein signaling, coupled to cyclic nucleotide second messenger // traceable author statement /// 7186 // G-protein coupled receptor protein signaling pathway // inferred from electronic annotation
210861_s_at	AF143679	WNT1 inducible signaling pathway protein 3	WISP3	8838	1558 // regulation of cell growth // inferred from electronic annotation /// 7165 // signal transduction // traceable author statement /// 7267 // cell-cell signaling // traceable author statement
210872_x_at	BC001152	growth arrest-specific 7	GAS7	8522	7050 // cell cycle arrest // traceable author statement /// 7399 // nervous system development // inferred from electronic annotation /// 30154 // cell differentiation // inferred from electronic annotation /// 7275 // development // inferred from electronic annotation
210880_s_at	AB001467	embryonal Fyn-associated substrate	EFS	10278	7155 // cell adhesion // inferred from electronic annotation /// 7242 // intracellular signaling cascade // traceable author statement
210881_s_at	M17863	insulin-like growth factor 2 (somatomedin A) /// insulin- insulin-like growth factor 2	IGF2 /// INS-IGF2		74 // regulation of progression through cell cycle // inferred from electronic annotation /// 1501 // skeletal development // traceable author statement /// 6349 // imprinting // traceable author statement /// 7275 // development // traceable author statement /// 7582 // physiological process // inferred from electronic annotation /// 8283 // cell proliferation // inferred from electronic annotat…
210904_s_at	U81380	interleukin 13 receptor, alpha 1	IL13RA1	3597	7166 // cell surface receptor linked signal transduction // traceable author statement
210948_s_at	AF294627	lymphoid enhancer-binding factor 1	LEF1	51176	6350 // transcription // inferred from electronic annotation /// 6355 // regulation of transcription, DNA-dependent // inferred from electronic annotation /// 16055 // Wnt receptor signaling pathway // inferred from electronic annotation
210972_x_at	M15565	T cell receptor alpha locus /// T cell receptor delta variable 2 /// T cell receptor alpha variable 20 /// T cell receptor alpha constant	TRA@ /// TRDV2 /// TRAV20 /// TRAC		6968 // cellular defense response // non-traceable author statement /// 6955 // immune response // non-traceable author statement
210986_s_at	Z24727	tropomyosin 1 (alpha)	TPM1	7168	6928 // cell motility // traceable author statement /// 6937 // regulation of muscle contraction // traceable author statement /// 8016 // regulation of heart contraction // traceable author statement /// 6633 // fatty acid biosynthesis // inferred from electronic annotation
210997_at	M77227	hepatocyte growth factor (hepapoietin A; scatter factor)	HGF	3082	6508 // proteolysis // inferred from electronic annotation /// 7067 // mitosis // non-traceable author statement /// 7596 // blood coagulation // inferred from electronic annotation
211020_at	L19659	glucosaminyl (N-acetyl) transferase 2, I-branching enzyme (I blood group)	GCNT2	2651	6024 // glycosaminoglycan biosynthesis // traceable author statement /// 6493 // protein amino acid O-linked glycosylation // not recorded /// 7275 // development // traceable author statement
211067_s_at	BC006454	growth arrest-specific 7 /// growth arrest-specific 7	GAS7	8522	7050 // cell cycle arrest // traceable author statement /// 7399 // nervous system development // inferred from electronic annotation /// 30154 // cell differentiation // inferred from electronic annotation /// 7275 // development // inferred from electronic annotation
211149_at	AF000994	ubiquitously transcribed tetratricopeptide repeat gene, Y-linked	UTY	7404	---
211161_s_at	AF130082	collagen, type III, alpha 1 (Ehlers-Danlos syndrome type IV, autosomal dominant)	COL3A1	1281	6817 // phosphate transport // inferred from electronic annotation /// 8015 // circulation // traceable author statement /// 9887 // organ morphogenesis // not recorded
211165_x_at	D31661	EPH receptor B2	EPHB2	2048	6468 // protein amino acid phosphorylation // inferred from electronic annotation /// 6468 // protein amino acid phosphorylation // traceable author statement /// 7169 // transmembrane receptor protein tyrosine kinase signaling pathway // inferred from electronic annotation /// 7399 // nervous system development // traceable author statement /// 16310 // phosphorylation // inferred from sequence …
211169_s_at	AF024579	protein phosphatase 1, regulatory (inhibitor) subunit 3A (glycogen and sarcoplasmic reticulum binding subunit, skeletal muscle)	PPP1R3A	5506	5975 // carbohydrate metabolism // inferred from electronic annotation /// 5977 // glycogen metabolism // inferred from electronic annotation
211203_s_at	U07820	contactin 1	CNTN1	1272	7155 // cell adhesion // non-traceable author statement /// 7219 // Notch signaling pathway // inferred from electronic annotation /// 7155 // cell adhesion // inferred from electronic annotation
211214_s_at	BC003614	death-associated protein kinase 1	DAPK1	1612	6468 // protein amino acid phosphorylation // inferred from direct assay /// 6915 // apoptosis // inferred from electronic annotation /// 7165 // signal transduction // inferred from electronic annotation /// 7243 // protein kinase cascade // inferred from direct assay /// 8624 // induction of apoptosis by extracellular signals // traceable author statement /// 6917 // induction of apoptosis // i…
211219_s_at	U11701	LIM homeobox 2	LHX2	9355	6355 // regulation of transcription, DNA-dependent // inferred from electronic annotation /// 6350 // transcription // inferred from electronic annotation /// 45449 // regulation of transcription // inferred from electronic annotation
211273_s_at	AF012130	T-box 1	TBX1	6899	6350 // transcription // inferred from electronic annotation /// 6357 // regulation of transcription from RNA polymerase II promoter // traceable author statement /// 7507 // heart development // traceable author statement /// 9653 // morphogenesis // traceable author statement /// 6355 // regulation of transcription, DNA-dependent // inferred from electronic annotation
211302_s_at	L20966	phosphodiesterase 4B, cAMP-specific (phosphodiesterase E4 dunce homolog, Drosophila)	PDE4B	5142	7165 // signal transduction // inferred from electronic annotation
211341_at	L20433	POU domain, class 4, transcription factor 1	POU4F1	5457	6357 // regulation of transcription from RNA polymerase II promoter // traceable author statement /// 7275 // development // inferred from electronic annotation /// 7409 // axonogenesis // traceable author statement /// 7416 // synaptogenesis // traceable author statement /// 6350 // transcription // inferred from electronic annotation /// 6355 // regulation of transcription, DNA-dependent // inf…
211361_s_at	AJ001696	serpin peptidase inhibitor, clade B (ovalbumin), member 13	SERPINB13	5275	9411 // response to UV // traceable author statement /// 30162 // regulation of proteolysis // non-traceable author statement
211367_s_at	U13699	caspase 1, apoptosis-related cysteine peptidase (interleukin 1, beta, convertase)	CASP1	834	6508 // proteolysis // inferred from direct assay /// 6508 // proteolysis // inferred from electronic annotation /// 7165 // signal transduction // traceable author statement /// 42981 // regulation of apoptosis // inferred from electronic annotation /// 43123 // positive regulation of I-kappaB kinase/NF-kappaB cascade // inferred from expression pattern /// 6508 // proteolysis // traceable autho…
211368_s_at	U13700	caspase 1, apoptosis-related cysteine peptidase (interleukin 1, beta, convertase)	CASP1	834	6508 // proteolysis // inferred from direct assay /// 6508 // proteolysis // inferred from electronic annotation /// 7165 // signal transduction // traceable author statement /// 42981 // regulation of apoptosis // inferred from electronic annotation /// 43123 // positive regulation of I-kappaB kinase/NF-kappaB cascade // inferred from expression pattern /// 6508 // proteolysis // traceable autho…
211401_s_at	AB030078	fibroblast growth factor receptor 2 (bacteria-expressed kinase, keratinocyte growth factor receptor, craniofacial dysostosis 1, Crouzon syndrome, Pfeiffer syndrome, Jackson-Weiss syndrome)	FGFR2	2263	6468 // protein amino acid phosphorylation // inferred from electronic annotation /// 6468 // protein amino acid phosphorylation // non-traceable author statement /// 16049 // cell growth // non-traceable author statement
211425_x_at	AF257500	synovial sarcoma, X breakpoint 4 /// synovial sarcoma, X breakpoint 4B	SSX4 /// SSX4B		6350 // transcription // inferred from electronic annotation /// 6355 // regulation of transcription, DNA-dependent // inferred from electronic annotation
211458_s_at	AF180519	GABA(A) receptor-associated protein like 1 /// GABA(A) receptors associated protein like 3	GABARAPL1 /// GABARAPL3		6605 // protein targeting // inferred from sequence or structural similarity /// 7268 // synaptic transmission // inferred from sequence or structural similarity
211467_s_at	U70862	nuclear factor I/B	NFIB	4781	6260 // DNA replication // inferred from electronic annotation /// 6350 // transcription // inferred from electronic annotation /// 6355 // regulation of transcription, DNA-dependent // inferred from electronic annotation
211470_s_at	AF186255	sulfotransferase family, cytosolic, 1C, member 1	SULT1C1	6819	9308 // amine metabolism // traceable author statement
211564_s_at	BC003096	PDZ and LIM domain 4	PDLIM4	8572	---
211571_s_at	D32039	chondroitin sulfate proteoglycan 2 (versican)	CSPG2	1462	7155 // cell adhesion // traceable author statement /// 7275 // development // traceable author statement /// 8037 // cell recognition // traceable author statement /// 7155 // cell adhesion // inferred from electronic annotation
211603_s_at	U35622	ets variant gene 4 (E1A enhancer binding protein, E1AF) /// ets variant gene 4 (E1A enhancer binding protein, E1AF)	ETV4	2118	6350 // transcription // inferred from electronic annotation /// 6355 // regulation of transcription, DNA-dependent // non-traceable author statement /// 6355 // regulation of transcription, DNA-dependent // inferred from electronic annotation
211668_s_at	K03226	plasminogen activator, urokinase /// plasminogen activator, urokinase	PLAU	5328	6508 // proteolysis // inferred from electronic annotation /// 6508 // proteolysis // traceable author statement /// 6935 // chemotaxis // traceable author statement /// 7165 // signal transduction // traceable author statement /// 7596 // blood coagulation // inferred from electronic annotation /// 42730 // fibrinolysis // inferred from electronic annotation /// 7596 // blood coagulation // not …
211675_s_at	AF054589	MyoD family inhibitor domain containing /// MyoD family inhibitor domain containing	MDFIC	29969	9615 // response to virus // non-traceable author statement
211709_s_at	BC005810	C-type lectin domain family 11, member A /// C-type lectin domain family 11, member A	CLEC11A	6320	8284 // positive regulation of cell proliferation // inferred from direct assay
211719_x_at	BC005858	fibronectin 1 /// fibronectin 1	FN1	2335	6953 // acute-phase response // inferred from electronic annotation /// 7155 // cell adhesion // non-traceable author statement /// 7169 // transmembrane receptor protein tyrosine kinase signaling pathway // non-traceable author statement /// 8152 // metabolism // inferred from electronic annotation /// 9611 // response to wounding // non-traceable author statement /// 16477 // cell migration // …
211732_x_at	BC005907	histamine N-methyltransferase /// histamine N-methyltransferase	HNMT	3176	7585 // respiratory gaseous exchange // traceable author statement
211737_x_at	BC005916	pleiotrophin (heparin binding growth factor 8, neurite growth-promoting factor 1) /// pleiotrophin (heparin binding growth factor 8, neurite growth-promoting factor 1)	PTN	5764	74 // regulation of progression through cell cycle // inferred from electronic annotation /// 7185 // transmembrane receptor protein tyrosine phosphatase signaling pathway // traceable author statement /// 7399 // nervous system development // traceable author statement /// 8283 // cell proliferation // inferred from electronic annotation /// 8284 // positive regulation of cell proliferation // t…
211776_s_at	BC006141	erythrocyte membrane protein band 4.1-like 3 /// erythrocyte membrane protein band 4.1-like 3	EPB41L3	23136	30866 // cortical actin cytoskeleton organization and biogenesis // inferred from electronic annotation
211789_s_at	AF312918	MLX interacting protein	MLXIP	22877	45449 // regulation of transcription // inferred from electronic annotation
211799_x_at	U62824	major histocompatibility complex, class I, C	HLA-C	3107	19882 // antigen presentation // inferred from electronic annotation /// 19883 // antigen presentation, endogenous antigen // inferred from electronic annotation /// 19885 // antigen processing, endogenous antigen via MHC class I // inferred from electronic annotation /// 6955 // immune response // inferred from electronic annotation
211813_x_at	AF138303	decorin	DCN	1634	9887 // organ morphogenesis // traceable author statement
211825_s_at	AF327066	Friend leukemia virus integration 1	FLI1	2313	6350 // transcription // inferred from electronic annotation /// 6355 // regulation of transcription, DNA-dependent // inferred from electronic annotation /// 7599 // hemostasis // traceable author statement /// 9887 // organ morphogenesis // traceable author statement
211828_s_at	AF172268	TRAF2 and NCK interacting kinase	TNIK	23043	6445 // regulation of translation // inferred from direct assay /// 6468 // protein amino acid phosphorylation // non-traceable author statement /// 6950 // response to stress // inferred from direct assay /// 7243 // protein kinase cascade // inferred from direct assay /// 7254 // JNK cascade // traceable author statement /// 6468 // protein amino acid phosphorylation // inferred from electronic…
211840_s_at	U50157	phosphodiesterase 4D, cAMP-specific (phosphodiesterase E3 dunce homolog, Drosophila)	PDE4D	5144	7165 // signal transduction // inferred from electronic annotation
211864_s_at	AF207990	fer-1-like 3, myoferlin (C. elegans)	FER1L3	26509	6936 // muscle contraction // traceable author statement /// 8015 // circulation // traceable author statement
211906_s_at	AB046400	serpin peptidase inhibitor, clade B (ovalbumin), member 4 /// serpin peptidase inhibitor, clade B (ovalbumin), member 4	SERPINB4	6318	6955 // immune response // non-traceable author statement /// 30162 // regulation of proteolysis // non-traceable author statement
211911_x_at	L07950	major histocompatibility complex, class I, B /// major histocompatibility complex, class I, B	HLA-B	3106	19882 // antigen presentation // inferred from electronic annotation /// 19883 // antigen presentation, endogenous antigen // inferred from electronic annotation /// 19885 // antigen processing, endogenous antigen via MHC class I // inferred from electronic annotation /// 6955 // immune response // inferred from electronic annotation /// 6952 // defense response // traceable author statement /// …
211919_s_at	AF348491	chemokine (C-X-C motif) receptor 4 /// chemokine (C-X-C motif) receptor 4	CXCR4	7852	7165 // signal transduction // inferred from electronic annotation /// 7186 // G-protein coupled receptor protein signaling pathway // inferred from electronic annotation
211959_at	AW007532	insulin-like growth factor binding protein 5	IGFBP5	3488	1558 // regulation of cell growth // inferred from electronic annotation /// 7165 // signal transduction // non-traceable author statement
211964_at	X05610	collagen, type IV, alpha 2	COL4A2	1284	6817 // phosphate transport // inferred from electronic annotation /// 30198 // extracellular matrix organization and biogenesis // non-traceable author statement
211980_at	AI922605	collagen, type IV, alpha 1	COL4A1	1282	6817 // phosphate transport // inferred from electronic annotation
211981_at	NM_001845	collagen, type IV, alpha 1	COL4A1	1282	6817 // phosphate transport // inferred from electronic annotation
212012_at	BF342851	peroxidasin homolog (Drosophila)	PXDN	7837	6955 // immune response // non-traceable author statement
212014_x_at	AI493245	CD44 molecule (Indian blood group)	CD44	960	7155 // cell adhesion // inferred from electronic annotation /// 7160 // cell-matrix adhesion // non-traceable author statement /// 16337 // cell-cell adhesion // non-traceable author statement
212063_at	BE903880	CD44 molecule (Indian blood group)	CD44	960	7155 // cell adhesion // inferred from electronic annotation /// 7160 // cell-matrix adhesion // non-traceable author statement /// 16337 // cell-cell adhesion // non-traceable author statement
212070_at	AL554008	G protein-coupled receptor 56	GPR56	9289	7155 // cell adhesion // inferred from direct assay /// 7155 // cell adhesion // traceable author statement /// 7165 // signal transduction // inferred from electronic annotation /// 7218 // neuropeptide signaling pathway // inferred from electronic annotation /// 7267 // cell-cell signaling // traceable author statement /// 7420 // brain development // inferred from mutant phenotype /// 7186 // …
212091_s_at	AI141603	collagen, type VI, alpha 1	COL6A1	1291	6817 // phosphate transport // inferred from electronic annotation /// 7155 // cell adhesion // inferred from electronic annotation /// 7155 // cell adhesion // non-traceable author statement
212092_at	BE858180	paternally expressed 10	PEG10	23089	---
212094_at	AL582836	paternally expressed 10	PEG10	23089	---
212097_at	AU147399	caveolin 1, caveolae protein, 22kDa	CAV1	857	30301 // cholesterol transport // traceable author statement /// 42632 // cholesterol homeostasis // traceable author statement
212143_s_at	BF340228	insulin-like growth factor binding protein 3	IGFBP3	3486	1558 // regulation of cell growth // inferred from electronic annotation /// 9968 // negative regulation of signal transduction // non-traceable author statement /// 43065 // positive regulation of apoptosis // inferred from mutant phenotype /// 45663 // positive regulation of myoblast differentiation // inferred from direct assay
212154_at	AI380298	syndecan 2 (heparan sulfate proteoglycan 1, cell surface-associated, fibroglycan)	SDC2	6383	---
212157_at	BE048514	syndecan 2 (heparan sulfate proteoglycan 1, cell surface-associated, fibroglycan)	SDC2	6383	---
212158_at	AL577322	syndecan 2 (heparan sulfate proteoglycan 1, cell surface-associated, fibroglycan)	SDC2	6383	---
212190_at	AL541302	serpin peptidase inhibitor, clade E (nexin, plasminogen activator inhibitor type 1), member 2	SERPINE2	5270	7399 // nervous system development // inferred from electronic annotation /// 30154 // cell differentiation // inferred from electronic annotation /// 30162 // regulation of proteolysis // non-traceable author statement /// 30334 // regulation of cell migration // non-traceable author statement /// 7275 // development // inferred from electronic annotation
212203_x_at	BF338947	interferon induced transmembrane protein 3 (1-8U)	IFITM3	10410	6955 // immune response // traceable author statement /// 9607 // response to biotic stimulus // inferred from electronic annotation /// 6955 // immune response // inferred from electronic annotation
212226_s_at	AA628586	phosphatidic acid phosphatase type 2B	PPAP2B	8613	6629 // lipid metabolism // non-traceable author statement /// 8354 // germ cell migration // traceable author statement
212233_at	AL523076	3'UTR of hypothetical protein (ORF1)	---		---
212268_at	NM_030666	serpin peptidase inhibitor, clade B (ovalbumin), member 1	SERPINB1	1992	---
212294_at	BG111761	guanine nucleotide binding protein (G protein), gamma 12	GNG12	55970	7165 // signal transduction // traceable author statement /// 7186 // G-protein coupled receptor protein signaling pathway // inferred from electronic annotation /// 7165 // signal transduction // inferred from electronic annotation
212298_at	BE620457	neuropilin 1	NRP1	8829	1525 // angiogenesis // inferred from electronic annotation /// 7155 // cell adhesion // inferred from electronic annotation /// 7165 // signal transduction // traceable author statement /// 7267 // cell-cell signaling // traceable author statement /// 7399 // nervous system development // inferred from electronic annotation /// 7411 // axon guidance // traceable author statement /// 8284 // posi…
212311_at	AA522514	KIAA0746 protein	KIAA0746	23231	---
212314_at	AB018289	KIAA0746 protein	KIAA0746	23231	---
212327_at	AK026815	hypothetical protein	DKFZP686A01247	22998	31032 // actomyosin structure organization and biogenesis // inferred from electronic annotation
212328_at	AB029025	hypothetical protein	DKFZP686A01247	22998	31032 // actomyosin structure organization and biogenesis // inferred from electronic annotation
212338_at	AA621962	myosin ID	MYO1D	4642	---
212344_at	AW043713	sulfatase 1	SULF1	23213	6915 // apoptosis // inferred from electronic annotation /// 8152 // metabolism // inferred from electronic annotation /// 30201 // heparan sulfate proteoglycan metabolism // non-traceable author statement
212353_at	AI479175	sulfatase 1	SULF1	23213	6915 // apoptosis // inferred from electronic annotation /// 8152 // metabolism // inferred from electronic annotation /// 30201 // heparan sulfate proteoglycan metabolism // non-traceable author statement
212415_at	AW150913	septin 6	2007-09-06	23157	910 // cytokinesis // traceable author statement /// 7049 // cell cycle // inferred from electronic annotation /// 51301 // cell division // inferred from electronic annotation
212464_s_at	X02761	fibronectin 1	FN1	2335	6953 // acute-phase response // inferred from electronic annotation /// 7155 // cell adhesion // non-traceable author statement /// 7169 // transmembrane receptor protein tyrosine kinase signaling pathway // non-traceable author statement /// 8152 // metabolism // inferred from electronic annotation /// 9611 // response to wounding // non-traceable author statement /// 16477 // cell migration // …
212488_at	N30339	collagen, type V, alpha 1	COL5A1	1289	6817 // phosphate transport // inferred from electronic annotation /// 7155 // cell adhesion // inferred from electronic annotation
212489_at	AI983428	collagen, type V, alpha 1	COL5A1	1289	6817 // phosphate transport // inferred from electronic annotation /// 7155 // cell adhesion // inferred from electronic annotation
212543_at	U83115	absent in melanoma 1	AIM1	202	---
212551_at	NM_006366	CAP, adenylate cyclase-associated protein, 2 (yeast)	CAP2	10486	7163 // establishment and/or maintenance of cell polarity // traceable author statement /// 7165 // signal transduction // traceable author statement /// 7190 // adenylate cyclase activation // traceable author statement
212554_at	N90755	CAP, adenylate cyclase-associated protein, 2 (yeast)	CAP2	10486	7163 // establishment and/or maintenance of cell polarity // traceable author statement /// 7165 // signal transduction // traceable author statement /// 7190 // adenylate cyclase activation // traceable author statement
212560_at	AV728268	chromosome 11 open reading frame 32	C11orf32	442871	---
212592_at	AV733266	Immunoglobulin J polypeptide, linker protein for immunoglobulin alpha and mu polypeptides	IGJ	3512	6955 // immune response // non-traceable author statement
212609_s_at	U79271	V-akt murine thymoma viral oncogene homolog 3 (protein kinase B, gamma)	AKT3	10000	6468 // protein amino acid phosphorylation // traceable author statement /// 7165 // signal transduction // traceable author statement /// 6468 // protein amino acid phosphorylation // inferred from electronic annotation
212646_at	D42043	raft-linking protein	RAFTLIN	23180	---
212654_at	AL566786	tropomyosin 2 (beta) /// peptidylprolyl isomerase (cyclophilin)-like 5	TPM2 /// PPIL5		---
212667_at	AL575922	secreted protein, acidic, cysteine-rich (osteonectin)	SPARC	6678	1503 // ossification // traceable author statement /// 7169 // transmembrane receptor protein tyrosine kinase signaling pathway // non-traceable author statement
212681_at	AI770004	erythrocyte membrane protein band 4.1-like 3	EPB41L3	23136	30866 // cortical actin cytoskeleton organization and biogenesis // inferred from electronic annotation
212713_at	R72286	microfibrillar-associated protein 4	MFAP4	4239	7155 // cell adhesion // non-traceable author statement /// 7155 // cell adhesion // inferred from electronic annotation
212724_at	BG054844	Rho family GTPase 3	RND3	390	7264 // small GTPase mediated signal transduction // inferred from electronic annotation
212741_at	AA923354	monoamine oxidase A	MAOA	4128	6118 // electron transport // inferred from electronic annotation /// 6584 // catecholamine metabolism // inferred from electronic annotation /// 7610 // behavior // traceable author statement /// 42135 // neurotransmitter catabolism // inferred from electronic annotation /// 6576 // biogenic amine metabolism // traceable author statement
212750_at	AB020630	protein phosphatase 1, regulatory (inhibitor) subunit 16B	PPP1R16B	26051	7165 // signal transduction // non-traceable author statement
212776_s_at	AI978623	obscurin-like 1	OBSL1	23363	6468 // protein amino acid phosphorylation // inferred from electronic annotation
212841_s_at	AI692180	PTPRF interacting protein, binding protein 2 (liprin beta 2)	PPFIBP2	8495	7154 // cell communication // non-traceable author statement /// 15074 // DNA integration // inferred from electronic annotation
212843_at	AA126505	neural cell adhesion molecule 1	NCAM1	4684	7155 // cell adhesion // inferred from electronic annotation /// 7155 // cell adhesion // non-traceable author statement /// 7267 // cell-cell signaling // not recorded /// 7268 // synaptic transmission // not recorded /// 7399 // nervous system development // inferred from electronic annotation /// 30154 // cell differentiation // inferred from electronic annotation /// 7275 // development // in…
212850_s_at	AA584297	low density lipoprotein receptor-related protein 4	LRP4	4038	6897 // endocytosis // inferred from electronic annotation
212859_x_at	BF217861	metallothionein 1E (functional)	MT1E	4493	---
212865_s_at	BF449063	collagen, type XIV, alpha 1 (undulin)	COL14A1	7373	6817 // phosphate transport // inferred from electronic annotation /// 7155 // cell adhesion // non-traceable author statement /// 30199 // collagen fibril organization // non-traceable author statement /// 7155 // cell adhesion // inferred from electronic annotation /// 30198 // extracellular matrix organization and biogenesis // non-traceable author statement
212873_at	BE349017	histocompatibility (minor) HA-1	HMHA1	23526	7242 // intracellular signaling cascade // inferred from electronic annotation /// 7165 // signal transduction // inferred from electronic annotation
212886_at	AL080169	coiled-coil domain containing 69	CCDC69	26112	---
212909_at	AL567376	LY6/PLAUR domain containing 1	LYPD1	116372	---
212915_at	AL569804	PDZ domain containing RING finger 3	PDZRN3	23024	---
212935_at	AB002360	MCF.2 cell line derived transforming sequence-like	MCF2L	23263	7242 // intracellular signaling cascade // inferred from electronic annotation /// 35023 // regulation of Rho protein signal transduction // inferred from electronic annotation
212937_s_at	M20776	collagen, type VI, alpha 1	COL6A1	1291	6817 // phosphate transport // inferred from electronic annotation /// 7155 // cell adhesion // inferred from electronic annotation /// 7155 // cell adhesion // non-traceable author statement
212940_at	BE350145	collagen, type VI, alpha 1	COL6A1	1291	6817 // phosphate transport // inferred from electronic annotation /// 7155 // cell adhesion // inferred from electronic annotation /// 7155 // cell adhesion // non-traceable author statement
212962_at	AK023573	synapse defective 1, Rho GTPase, homolog 1 (C. elegans)	SYDE1	85360	7165 // signal transduction // inferred from electronic annotation
212977_at	AI817041	chemokine orphan receptor 1	CMKOR1	57007	7165 // signal transduction // inferred from electronic annotation /// 7186 // G-protein coupled receptor protein signaling pathway // inferred from electronic annotation
212993_at	AA114166	MRNA; cDNA DKFZp667B1718 (from clone DKFZp667B1718)	---		---
213005_s_at	D79994	ankyrin repeat domain 15	ANKRD15	23189	7049 // cell cycle // inferred from electronic annotation /// 45786 // negative regulation of progression through cell cycle // inferred from electronic annotation
213029_at	BG478428	nuclear factor I/B	NFIB	4781	6260 // DNA replication // inferred from electronic annotation /// 6350 // transcription // inferred from electronic annotation /// 6355 // regulation of transcription, DNA-dependent // inferred from electronic annotation
213030_s_at	AI688418	plexin A2	PLXNA2	5362	7275 // development // inferred from electronic annotation
213032_at	AI186739	nuclear factor I/B	NFIB	4781	6260 // DNA replication // inferred from electronic annotation /// 6350 // transcription // inferred from electronic annotation /// 6355 // regulation of transcription, DNA-dependent // inferred from electronic annotation
213033_s_at	AI186739	nuclear factor I/B	NFIB	4781	6260 // DNA replication // inferred from electronic annotation /// 6350 // transcription // inferred from electronic annotation /// 6355 // regulation of transcription, DNA-dependent // inferred from electronic annotation
213036_x_at	Y15724	ATPase, Ca++ transporting, ubiquitous	ATP2A3	489	6812 // cation transport // inferred from electronic annotation /// 6816 // calcium ion transport // traceable author statement /// 8152 // metabolism // inferred from electronic annotation /// 15992 // proton transport // inferred from electronic annotation /// 6810 // transport // inferred from electronic annotation /// 6811 // ion transport // inferred from electronic annotation /// 6816 // ca…
213040_s_at	AL008583	neuronal pentraxin receptor	NPTXR	23467	---
213050_at	AA594937	cordon-bleu homolog (mouse)	COBL	23242	---
213056_at	AU145019	FERM domain containing 4B	FRMD4B	23150	---
213075_at	AL050002	olfactomedin-like 2A	OLFML2A	169611	---
213106_at	AI769688	---	---		---
213110_s_at	AW052179	collagen, type IV, alpha 5 (Alport syndrome)	COL4A5	1287	6817 // phosphate transport // inferred from electronic annotation
213122_at	AI096375	TSPY-like 5	TSPYL5	85453	6334 // nucleosome assembly // inferred from electronic annotation
213131_at	R38389	olfactomedin 1	OLFM1	10439	7275 // development // inferred from electronic annotation /// 7399 // nervous system development // traceable author statement
213139_at	AI572079	snail homolog 2 (Drosophila)	SNAI2	6591	122 // negative regulation of transcription from RNA polymerase II promoter // traceable author statement /// 6350 // transcription // inferred from electronic annotation /// 6355 // regulation of transcription, DNA-dependent // inferred from electronic annotation /// 7275 // development // inferred from electronic annotation /// 7499 // ectoderm and mesoderm interaction // traceable author state…
213142_x_at	AV700415	hypothetical protein LOC54103	LOC54103	54103	---
213147_at	AI375919	homeobox A10	HOXA10	3206	6355 // regulation of transcription, DNA-dependent // inferred from electronic annotation /// 7275 // development // traceable author statement /// 7283 // spermatogenesis // traceable author statement /// 6350 // transcription // inferred from electronic annotation /// 7275 // development // inferred from electronic annotation /// 45449 // regulation of transcription // inferred from electronic …
213150_at	BF792917	homeobox A10	HOXA10	3206	6355 // regulation of transcription, DNA-dependent // inferred from electronic annotation /// 7275 // development // traceable author statement /// 7283 // spermatogenesis // traceable author statement /// 6350 // transcription // inferred from electronic annotation /// 7275 // development // inferred from electronic annotation /// 45449 // regulation of transcription // inferred from electronic …
213155_at	AB011095	KIAA0523 protein	KIAA0523	23302	---
213160_at	D86964	dedicator of cytokinesis 2	DOCK2	1794	30036 // actin cytoskeleton organization and biogenesis // traceable author statement /// 48247 // lymphocyte chemotaxis // inferred from sequence or structural similarity
213169_at	BG109855	Clone TUA8 Cri-du-chat region mRNA	---		---
213172_at	AW235608	tetratricopeptide repeat domain 9	TTC9	23508	---
213197_at	AB006627	astrotactin 1	ASTN1	460	7155 // cell adhesion // inferred from electronic annotation /// 7158 // neuron adhesion // non-traceable author statement /// 16477 // cell migration // non-traceable author statement
213201_s_at	AJ011712	troponin T type 1 (skeletal, slow)	TNNT1	7138	6937 // regulation of muscle contraction // traceable author statement
213217_at	AU149572	adenylate cyclase 2 (brain)	ADCY2	108	6171 // cAMP biosynthesis // non-traceable author statement /// 7242 // intracellular signaling cascade // inferred from electronic annotation /// 6171 // cAMP biosynthesis // inferred from electronic annotation /// 9190 // cyclic nucleotide biosynthesis // inferred from electronic annotation
213222_at	AL049593	phospholipase C, beta 1 (phosphoinositide-specific)	PLCB1	23236	74 // regulation of progression through cell cycle // non-traceable author statement /// 6629 // lipid metabolism // inferred from electronic annotation /// 7242 // intracellular signaling cascade // inferred from electronic annotation /// 16042 // lipid catabolism // inferred from electronic annotation /// 7165 // signal transduction // inferred from electronic annotation /// 7165 // signal tran…
213236_at	AK025495	SAM and SH3 domain containing 1	SASH1	23328	7049 // cell cycle // inferred from electronic annotation /// 45786 // negative regulation of progression through cell cycle // inferred from electronic annotation
213245_at	AL120173	adenylate cyclase 1 (brain)	ADCY1	107	6171 // cAMP biosynthesis // non-traceable author statement /// 7242 // intracellular signaling cascade // inferred from electronic annotation /// 6171 // cAMP biosynthesis // inferred from electronic annotation /// 9190 // cyclic nucleotide biosynthesis // inferred from electronic annotation
213249_at	AU145127	F-box and leucine-rich repeat protein 7	FBXL7	23194	6511 // ubiquitin-dependent protein catabolism // non-traceable author statement /// 6512 // ubiquitin cycle // inferred from electronic annotation
213258_at	BF511231	tissue factor pathway inhibitor (lipoprotein-associated coagulation inhibitor)	TFPI	7035	7596 // blood coagulation // inferred from electronic annotation /// 7596 // blood coagulation // traceable author statement
213268_at	Z98884	calmodulin binding transcription activator 1	CAMTA1	23261	6350 // transcription // inferred from electronic annotation /// 6355 // regulation of transcription, DNA-dependent // inferred from electronic annotation
213273_at	BF112171	odz, odd Oz/ten-m homolog 4 (Drosophila)	ODZ4	26011	---
213280_at	AK000478	similar to GTPase activating Rap/RanGAP domain-like 4	LOC653127	653127	---
213293_s_at	AA083478	tripartite motif-containing 22	TRIM22	10346	6355 // regulation of transcription, DNA-dependent // traceable author statement /// 6955 // immune response // traceable author statement /// 9615 // response to virus // traceable author statement
213308_at	BF435773	SH3 and multiple ankyrin repeat domains 2	SHANK2	22941	7242 // intracellular signaling cascade // non-traceable author statement
213316_at	AL050154	KIAA1462	KIAA1462	57608	---
213338_at	BF062629	transmembrane protein 158	TMEM158	25907	---
213353_at	BF693921	ATP-binding cassette, sub-family A (ABC1), member 5	ABCA5	23461	---
213355_at	AI989567	ST3 beta-galactoside alpha-2,3-sialyltransferase 6	ST3GAL6	10402	6040 // amino sugar metabolism // traceable author statement /// 6486 // protein amino acid glycosylation // inferred from electronic annotation /// 6664 // glycolipid metabolism // traceable author statement /// 9249 // protein-lipoylation // traceable author statement
213362_at	N73931	protein tyrosine phosphatase, receptor type, D	PTPRD	5789	6470 // protein amino acid dephosphorylation // traceable author statement /// 6796 // phosphate metabolism // non-traceable author statement /// 7185 // transmembrane receptor protein tyrosine phosphatase signaling pathway // traceable author statement /// 6470 // protein amino acid dephosphorylation // inferred from electronic annotation
213385_at	AK026415	chimerin (chimaerin) 2	CHN2	1124	7242 // intracellular signaling cascade // inferred from electronic annotation /// 7165 // signal transduction // inferred from electronic annotation
213395_at	AL022327	megalencephalic leukoencephalopathy with subcortical cysts 1	MLC1	23209	6412 // protein biosynthesis // inferred from electronic annotation /// 6811 // ion transport // inferred from electronic annotation /// 6810 // transport // inferred from electronic annotation
213397_x_at	AI761728	ribonuclease, RNase A family, 4	RNASE4	6038	6379 // mRNA cleavage // non-traceable author statement /// 1525 // angiogenesis // inferred from mutant phenotype /// 7046 // ribosome biogenesis // inferred from mutant phenotype /// 7202 // phospholipase C activation // inferred from mutant phenotype /// 9303 // rRNA transcription // inferred from mutant phenotype /// 43006 // calcium-dependent phospholipase A2 activation // inferred from muta…
213416_at	BG532690	integrin, alpha 4 (antigen CD49D, alpha 4 subunit of VLA-4 receptor)	ITGA4	3676	7155 // cell adhesion // inferred from electronic annotation /// 7229 // integrin-mediated signaling pathway // inferred from electronic annotation
213417_at	AW173045	T-box 2	TBX2	6909	6350 // transcription // inferred from electronic annotation /// 6355 // regulation of transcription, DNA-dependent // inferred from electronic annotation /// 7275 // development // inferred from electronic annotation
213425_at	AI968085	wingless-type MMTV integration site family, member 5A /// wingless-type MMTV integration site family, member 5A	WNT5A	7474	7165 // signal transduction // traceable author statement /// 7223 // frizzled-2 signaling pathway // inferred from electronic annotation /// 7267 // cell-cell signaling // traceable author statement /// 9653 // morphogenesis // traceable author statement /// 7275 // development // inferred from electronic annotation /// 16055 // Wnt receptor signaling pathway // inferred from electronic annotati…
213428_s_at	AA292373	collagen, type VI, alpha 1	COL6A1	1291	6817 // phosphate transport // inferred from electronic annotation /// 7155 // cell adhesion // inferred from electronic annotation /// 7155 // cell adhesion // non-traceable author statement
213429_at	AW025579	CDNA FLJ26539 fis, clone KDN09310	---		---
213435_at	AB028957	SATB family member 2	SATB2	23314	6355 // regulation of transcription, DNA-dependent // inferred from electronic annotation /// 6350 // transcription // inferred from electronic annotation /// 45449 // regulation of transcription // inferred from electronic annotation
213438_at	AA995925	neurofascin homolog (chicken)	NFASC	23114	7155 // cell adhesion // inferred from electronic annotation
213456_at	AI927000	sclerostin domain containing 1	SOSTDC1	25928	16055 // Wnt receptor signaling pathway // inferred from electronic annotation
213479_at	U26662	neuronal pentraxin II	NPTX2	4885	7268 // synaptic transmission // non-traceable author statement
213484_at	AI097640	Clone 23700 mRNA sequence	---		---
213496_at	AW592563	plasticity related gene 1	LPPR4	9890	---
213506_at	BE965369	coagulation factor II (thrombin) receptor-like 1	F2RL1	2150	7165 // signal transduction // inferred from electronic annotation /// 7186 // G-protein coupled receptor protein signaling pathway // traceable author statement /// 7204 // elevation of cytosolic calcium ion concentration // traceable author statement /// 7596 // blood coagulation // inferred from electronic annotation /// 7186 // G-protein coupled receptor protein signaling pathway // inferred …
213519_s_at	AI078169	laminin, alpha 2 (merosin, congenital muscular dystrophy)	LAMA2	3908	7517 // muscle development // traceable author statement /// 30155 // regulation of cell adhesion // inferred from electronic annotation /// 30334 // regulation of cell migration // inferred from electronic annotation /// 45995 // regulation of embryonic development // inferred from electronic annotation /// 7155 // cell adhesion // inferred from electronic annotation
213533_at	M98528	DNA segment on chromosome 4 (unique) 234 expressed sequence	D4S234E	27065	7212 // dopamine receptor signaling pathway // inferred from electronic annotation
213543_at	AA570453	MRNA from chromosome 5q31-33 region	---		---
213572_s_at	AI554300	serpin peptidase inhibitor, clade B (ovalbumin), member 1	SERPINB1	1992	---
213603_s_at	BE138888	ras-related C3 botulinum toxin substrate 2 (rho family, small GTP binding protein Rac2)	RAC2	5880	7165 // signal transduction // traceable author statement /// 7264 // small GTPase mediated signal transduction // inferred from electronic annotation
213618_at	AB011152	centaurin, delta 1	CENTD1	116984	7165 // signal transduction // inferred from electronic annotation /// 43087 // regulation of GTPase activity // inferred from electronic annotation
213620_s_at	AA126728	intercellular adhesion molecule 2	ICAM2	3384	16337 // cell-cell adhesion // inferred from electronic annotation /// 7155 // cell adhesion // inferred from electronic annotation
213638_at	AW054711	phosphatase and actin regulator 1	PHACTR1	221692	---
213640_s_at	BE503425	lysyl oxidase	LOX	4015	6464 // protein modification // traceable author statement /// 7169 // transmembrane receptor protein tyrosine kinase signaling pathway // non-traceable author statement
213664_at	AW235061	solute carrier family 1 (neuronal/epithelial high affinity glutamate transporter, system Xag), member 1	SLC1A1	6505	6810 // transport // inferred from electronic annotation /// 6835 // dicarboxylic acid transport // inferred from electronic annotation /// 7268 // synaptic transmission // traceable author statement /// 15813 // L-glutamate transport // traceable author statement
213712_at	BF508639	elongation of very long chain fatty acids (FEN1/Elo2, SUR4/Elo3, yeast)-like 2	ELOVL2	54898	6633 // fatty acid biosynthesis // inferred from electronic annotation /// 8610 // lipid biosynthesis // inferred from electronic annotation
213714_at	AI040163	calcium channel, voltage-dependent, beta 2 subunit	CACNB2	783	6811 // ion transport // inferred from electronic annotation /// 6816 // calcium ion transport // inferred from electronic annotation /// 6816 // calcium ion transport // non-traceable author statement /// 7528 // neuromuscular junction development // traceable author statement /// 6810 // transport // inferred from electronic annotation /// 6810 // transport // traceable author statement
213721_at	L07335	SRY (sex determining region Y)-box 2	SOX2	6657	6325 // establishment and/or maintenance of chromatin architecture // non-traceable author statement /// 6350 // transcription // inferred from electronic annotation /// 6355 // regulation of transcription, DNA-dependent // inferred from electronic annotation /// 6355 // regulation of transcription, DNA-dependent // non-traceable author statement
213725_x_at	AI693140	hypothetical protein LOC283824	LOC283824	283824	---
213745_at	AW151108	attractin-like 1	ATRNL1	26033	7275 // development // inferred from electronic annotation
213764_s_at	AW665892	microfibrillar associated protein 5	MFAP5	8076	---
213790_at	W46291	CDNA FLJ31066 fis, clone HSYRA2001153	---		---
213797_at	AI337069	radical S-adenosyl methionine domain containing 2	RSAD2	91543	---
213800_at	X04697	complement factor H	CFH	3075	6957 // complement activation, alternative pathway // inferred from electronic annotation /// 45087 // innate immune response // inferred from electronic annotation /// 6955 // immune response // inferred from electronic annotation /// 6956 // complement activation // traceable author statement
213802_at	AI810767	Protease, serine, 12 (neurotrypsin, motopsin)	PRSS12	8492	6508 // proteolysis // inferred from electronic annotation
213817_at	AL049435	CDNA FLJ13601 fis, clone PLACE1010069	---		---
213825_at	AA757419	oligodendrocyte lineage transcription factor 2	OLIG2	10215	6355 // regulation of transcription, DNA-dependent // inferred from electronic annotation /// 7275 // development // inferred from electronic annotation /// 6350 // transcription // inferred from electronic annotation /// 45449 // regulation of transcription // inferred from electronic annotation
213844_at	NM_019102	homeobox A5	HOXA5	3202	6355 // regulation of transcription, DNA-dependent // non-traceable author statement /// 7275 // development // non-traceable author statement /// 6350 // transcription // inferred from electronic annotation /// 6355 // regulation of transcription, DNA-dependent // inferred from electronic annotation /// 7275 // development // inferred from electronic annotation /// 45449 // regulation of transcr…
213845_at	AL355532	Glutamate receptor, ionotropic, kainate 2	GRIK2	2898	6811 // ion transport // inferred from electronic annotation /// 7215 // glutamate signaling pathway // traceable author statement /// 7268 // synaptic transmission // traceable author statement /// 31557 // induction of programmed cell death in response to chemical stimulus // non-traceable author statement /// 48172 // regulation of short-term neuronal synaptic plasticity // inferred from mutan…
213856_at	BG230614	CD47 molecule	CD47	961	7155 // cell adhesion // inferred from electronic annotation /// 7160 // cell-matrix adhesion // not recorded /// 7229 // integrin-mediated signaling pathway // traceable author statement
213880_at	AL524520	leucine-rich repeat-containing G protein-coupled receptor 5	LGR5	8549	7165 // signal transduction // inferred from electronic annotation /// 7186 // G-protein coupled receptor protein signaling pathway // traceable author statement /// 7186 // G-protein coupled receptor protein signaling pathway // inferred from electronic annotation
213888_s_at	AL022398	TRAF3 interacting protein 3	TRAF3IP3	80342	---
213894_at	BF447246	hypothetical protein LOC221981	KIAA0960	221981	---
213905_x_at	AA845258	biglycan /// teashirt family zinc finger 1	BGN /// TSHZ1		6355 // regulation of transcription, DNA-dependent // inferred from electronic annotation /// 7275 // development // inferred from electronic annotation /// 6350 // transcription // inferred from electronic annotation /// 45449 // regulation of transcription // inferred from electronic annotation
213912_at	AW134976	KIAA0984 protein	KIAA0984	23329	---
213913_s_at	AW134976	KIAA0984 protein	KIAA0984	23329	---
213920_at	AB006631	cut-like 2 (Drosophila)	CUTL2	23316	6355 // regulation of transcription, DNA-dependent // non-traceable author statement /// 6350 // transcription // inferred from electronic annotation /// 6355 // regulation of transcription, DNA-dependent // inferred from electronic annotation /// 45449 // regulation of transcription // inferred from electronic annotation
213943_at	X99268	twist homolog 1 (acrocephalosyndactyly 3; Saethre-Chotzen syndrome) (Drosophila)	TWIST1	7291	122 // negative regulation of transcription from RNA polymerase II promoter // traceable author statement /// 1501 // skeletal development // traceable author statement /// 6355 // regulation of transcription, DNA-dependent // inferred from electronic annotation /// 7001 // chromosome organization and biogenesis (sensu Eukaryota) // traceable author statement /// 9653 // morphogenesis // traceabl…
213955_at	BE673151	myozenin 3	MYOZ3	91977	---
213994_s_at	AI885290	spondin 1, extracellular matrix protein	SPON1	10418	7155 // cell adhesion // inferred from electronic annotation /// 7275 // development // inferred from electronic annotation
213997_at	AB011146	KIAA0574 protein	KIAA0574	23359	---
214022_s_at	AA749101	interferon induced transmembrane protein 1 (9-27)	IFITM1	8519	74 // regulation of progression through cell cycle // traceable author statement /// 6955 // immune response // inferred from electronic annotation /// 7166 // cell surface receptor linked signal transduction // traceable author statement /// 8285 // negative regulation of cell proliferation // traceable author statement /// 9607 // response to biotic stimulus // inferred from electronic annotati…
214023_x_at	AL533838	tubulin, beta 2B	TUBB2B	347733	7018 // microtubule-based movement // inferred from electronic annotation /// 51258 // protein polymerization // inferred from electronic annotation
214040_s_at	BE675337	gelsolin (amyloidosis, Finnish type)	GSN	2934	30041 // actin filament polymerization // inferred from direct assay /// 51014 // actin filament severing // inferred from direct assay /// 51016 // barbed-end actin filament capping // traceable author statement /// 51016 // barbed-end actin filament capping // inferred from electronic annotation
214043_at	BF062299	protein tyrosine phosphatase, receptor type, D	PTPRD	5789	6470 // protein amino acid dephosphorylation // traceable author statement /// 6796 // phosphate metabolism // non-traceable author statement /// 7185 // transmembrane receptor protein tyrosine phosphatase signaling pathway // traceable author statement /// 6470 // protein amino acid dephosphorylation // inferred from electronic annotation
214046_at	AA017721	MRNA; cDNA DKFZp686F1844 (from clone DKFZp686F1844)	---		---
214053_at	AW772192	v-erb-a erythroblastic leukemia viral oncogene homolog 4 (avian)	ERBB4	2066	6468 // protein amino acid phosphorylation // inferred from electronic annotation /// 7165 // signal transduction // inferred from direct assay /// 7169 // transmembrane receptor protein tyrosine kinase signaling pathway // inferred from electronic annotation /// 7275 // development // traceable author statement /// 8283 // cell proliferation // traceable author statement
214071_at	AI082827	Metallophosphoesterase 1	MPPE1	65258	---
214078_at	AF070581	P21 (CDKN1A)-activated kinase 3	PAK3	5063	6468 // protein amino acid phosphorylation // inferred from electronic annotation /// 7275 // development // inferred from electronic annotation /// 6468 // protein amino acid phosphorylation // not recorded
214120_at	AW157535	ret finger protein-like 1 antisense	RFPL1S	10740	---
214131_at	AL049280	chromosome Y open reading frame 15B	CYorf15B	84663	---
214156_at	AL050090	myosin VIIA and Rab interacting protein	MYRIP	25924	6886 // intracellular protein transport // inferred from electronic annotation
214162_at	AF070541	hypothetical protein LOC284244	LOC284244	284244	---
214175_x_at	AI254547	PDZ and LIM domain 4	PDLIM4	8572	---
214240_at	AL556409	galanin	GAL	51083	6939 // smooth muscle contraction // non-traceable author statement /// 7218 // neuropeptide signaling pathway // inferred from electronic annotation /// 30073 // insulin secretion // non-traceable author statement /// 30252 // growth hormone secretion // non-traceable author statement
214247_s_at	AU148057	dickkopf homolog 3 (Xenopus laevis)	DKK3	27122	6118 // electron transport // inferred from electronic annotation /// 7275 // development // inferred from electronic annotation /// 9653 // morphogenesis // traceable author statement /// 16055 // Wnt receptor signaling pathway // inferred from electronic annotation /// 30178 // negative regulation of Wnt receptor signaling pathway // inferred from electronic annotation
214297_at	BE857703	Chondroitin sulfate proteoglycan 4 (melanoma-associated)	CSPG4	1464	1525 // angiogenesis // inferred from electronic annotation /// 7165 // signal transduction // inferred from electronic annotation /// 9888 // tissue development // inferred from electronic annotation /// 30154 // cell differentiation // inferred from electronic annotation /// 7275 // development // inferred from electronic annotation
214405_at	Z39557	CUG triplet repeat, RNA binding protein 2	CUGBP2	10659	6396 // RNA processing // traceable author statement /// 8016 // regulation of heart contraction // traceable author statement /// 7528 // neuromuscular junction development // not recorded
214433_s_at	NM_003944	selenium binding protein 1 /// selenium binding protein 1	SELENBP1	8991	---
214438_at	M60721	H2.0-like homeobox 1 (Drosophila)	HLX1	3142	6355 // regulation of transcription, DNA-dependent // inferred from electronic annotation /// 6366 // transcription from RNA polymerase II promoter // not recorded /// 7275 // development // traceable author statement /// 6350 // transcription // inferred from electronic annotation /// 45449 // regulation of transcription // inferred from electronic annotation
214451_at	NM_003221	transcription factor AP-2 beta (activating enhancer binding protein 2 beta)	TFAP2B	7021	6350 // transcription // inferred from electronic annotation /// 6357 // regulation of transcription from RNA polymerase II promoter // traceable author statement /// 7399 // nervous system development // traceable author statement /// 6355 // regulation of transcription, DNA-dependent // inferred from electronic annotation
214453_s_at	NM_006417	interferon-induced protein 44	IFI44	10561	9615 // response to virus // traceable author statement /// 6955 // immune response // inferred from electronic annotation
214459_x_at	M12679	major histocompatibility complex, class I, C	HLA-C	3107	19882 // antigen presentation // inferred from electronic annotation /// 19883 // antigen presentation, endogenous antigen // inferred from electronic annotation /// 19885 // antigen processing, endogenous antigen via MHC class I // inferred from electronic annotation /// 6955 // immune response // inferred from electronic annotation /// 6955 // immune response // non-traceable author statement
214577_at	BG164365	microtubule-associated protein 1B	MAP1B	4131	---
214586_at	T16257	G protein-coupled receptor 37 (endothelin receptor type B-like)	GPR37	2861	7165 // signal transduction // inferred from electronic annotation /// 7186 // G-protein coupled receptor protein signaling pathway // traceable author statement /// 7186 // G-protein coupled receptor protein signaling pathway // inferred from electronic annotation
214591_at	BF215673	kelch-like 4 (Drosophila)	KLHL4	56062	30036 // actin cytoskeleton organization and biogenesis // inferred from sequence or structural similarity
214595_at	AI332979	potassium voltage-gated channel, subfamily G, member 1	KCNG1	3755	6811 // ion transport // inferred from electronic annotation /// 6813 // potassium ion transport // non-traceable author statement /// 6813 // potassium ion transport // inferred from electronic annotation /// 6810 // transport // inferred from electronic annotation
214596_at	T15991	---	---		---
214601_at	AI350339	tryptophan hydroxylase 1 (tryptophan 5-monooxygenase)	TPH1	7166	6587 // serotonin biosynthesis from tryptophan // inferred from electronic annotation /// 8152 // metabolism // inferred from electronic annotation /// 9072 // aromatic amino acid family metabolism // inferred from electronic annotation /// 42427 // serotonin biosynthesis // inferred from electronic annotation /// 6568 // tryptophan metabolism // not recorded /// 6587 // serotonin biosynthesis fr…
214604_at	NM_021192	homeobox D11	HOXD11	3237	6355 // regulation of transcription, DNA-dependent // non-traceable author statement /// 7275 // development // inferred from electronic annotation /// 6355 // regulation of transcription, DNA-dependent // inferred from electronic annotation
214607_at	AW085556	p21 (CDKN1A)-activated kinase 3	PAK3	5063	6468 // protein amino acid phosphorylation // inferred from electronic annotation /// 7275 // development // inferred from electronic annotation /// 6468 // protein amino acid phosphorylation // not recorded
214608_s_at	AJ000098	eyes absent homolog 1 (Drosophila)	EYA1	2138	6350 // transcription // inferred from electronic annotation /// 6355 // regulation of transcription, DNA-dependent // inferred from electronic annotation /// 7275 // development // inferred from electronic annotation /// 7605 // sensory perception of sound // traceable author statement /// 8152 // metabolism // inferred from electronic annotation /// 9653 // morphogenesis // traceable author sta…
214612_x_at	U10691	melanoma antigen family A, 6	MAGEA6	4105	---
214639_s_at	S79910	homeobox A1	HOXA1	3198	6355 // regulation of transcription, DNA-dependent // inferred from electronic annotation /// 7275 // development // traceable author statement /// 6350 // transcription // inferred from electronic annotation /// 7275 // development // inferred from electronic annotation /// 45449 // regulation of transcription // inferred from electronic annotation
214651_s_at	U41813	homeobox A9	HOXA9	3205	6355 // regulation of transcription, DNA-dependent // inferred from electronic annotation /// 7275 // development // traceable author statement /// 6350 // transcription // inferred from electronic annotation /// 7275 // development // inferred from electronic annotation /// 45449 // regulation of transcription // inferred from electronic annotation
214702_at	AJ276395	fibronectin 1	FN1	2335	6953 // acute-phase response // inferred from electronic annotation /// 7155 // cell adhesion // non-traceable author statement /// 7169 // transmembrane receptor protein tyrosine kinase signaling pathway // non-traceable author statement /// 8152 // metabolism // inferred from electronic annotation /// 9611 // response to wounding // non-traceable author statement /// 16477 // cell migration // …
214708_at	BG484314	syntrophin, beta 1 (dystrophin-associated protein A1, 59kDa, basic component 1)	SNTB1	6641	6936 // muscle contraction // traceable author statement
214761_at	AW149417	zinc finger protein 423	ZNF423	23090	---
214770_at	AI299239	macrophage scavenger receptor 1	MSR1	4481	6817 // phosphate transport // inferred from electronic annotation /// 6898 // receptor mediated endocytosis // inferred from electronic annotation /// 6898 // receptor mediated endocytosis // traceable author statement /// 6897 // endocytosis // inferred from electronic annotation
214774_x_at	AK027006	trinucleotide repeat containing 9	TNRC9	27324	6355 // regulation of transcription, DNA-dependent // inferred from electronic annotation
214791_at	AK023116	hypothetical protein BC004921	LOC93349	93349	---
214811_at	AB002316	RIMS binding protein 2	RIMBP2	23504	---
214823_at	AF033199	zinc finger protein 204	ZNF204	7754	---
214825_at	L10374	(clone CTG-A4) mRNA sequence	---		---
214890_s_at	AL080065	DKFZP564J102 protein	DKFZP564J102	25854	---
214912_at	AK022067	---	---		---
214913_at	AB002364	ADAM metallopeptidase with thrombospondin type 1 motif, 3	ADAMTS3	9508	6508 // proteolysis // inferred from electronic annotation /// 30199 // collagen fibril organization // non-traceable author statement /// 30574 // collagen catabolism // non-traceable author statement
214920_at	R33964	hypothetical protein LOC221981	KIAA0960	221981	---
214930_at	AW449813	SLIT and NTRK-like family, member 5	SLITRK5	26050	---
214954_at	BF977837	sushi domain containing 5	SUSD5	26032	7155 // cell adhesion // inferred from electronic annotation
214956_at	AF090101	AP2 associated kinase 1	AAK1	22848	6468 // protein amino acid phosphorylation // inferred from electronic annotation
214961_at	AI818409	KIAA0774	KIAA0774	23281	---
214978_s_at	AK023365	protein tyrosine phosphatase, receptor type, f polypeptide (PTPRF), interacting protein (liprin), alpha 4	PPFIA4	8497	7154 // cell communication // non-traceable author statement
214983_at	AL080135	testis-specific transcript, Y-linked 15	TTTY15	64595	---
214993_at	AF070642	aspartate beta-hydroxylase domain containing 1	ASPHD1	253982	18193 // peptidyl-amino acid modification // inferred from electronic annotation
215014_at	AL512727	---	---		---
215028_at	AB002438	sema domain, transmembrane domain (TM), and cytoplasmic domain, (semaphorin) 6A	SEMA6A	57556	6915 // apoptosis // non-traceable author statement /// 7010 // cytoskeleton organization and biogenesis // non-traceable author statement /// 7166 // cell surface receptor linked signal transduction // non-traceable author statement /// 7275 // development // inferred from electronic annotation /// 7399 // nervous system development // non-traceable author statement /// 7411 // axon guidance // …
215034_s_at	AI189753	transmembrane 4 L six family member 1	TM4SF1	4071	---
215047_at	AL080170	tripartite motif-containing 58	TRIM58	25893	---
215073_s_at	AL554245	nuclear receptor subfamily 2, group F, member 2	NR2F2	7026	6350 // transcription // inferred from electronic annotation /// 6357 // regulation of transcription from RNA polymerase II promoter // traceable author statement /// 6629 // lipid metabolism // traceable author statement /// 7165 // signal transduction // traceable author statement /// 6355 // regulation of transcription, DNA-dependent // inferred from electronic annotation
215076_s_at	AU144167	collagen, type III, alpha 1 (Ehlers-Danlos syndrome type IV, autosomal dominant)	COL3A1	1281	6817 // phosphate transport // inferred from electronic annotation /// 8015 // circulation // traceable author statement /// 9887 // organ morphogenesis // not recorded
215108_x_at	U80736	trinucleotide repeat containing 9	TNRC9	27324	6355 // regulation of transcription, DNA-dependent // inferred from electronic annotation
215145_s_at	AC005378	contactin associated protein-like 2	CNTNAP2	26047	7155 // cell adhesion // inferred from electronic annotation /// 8038 // neuron recognition // non-traceable author statement /// 19226 // transmission of nerve impulse // non-traceable author statement /// 6508 // proteolysis // inferred from electronic annotation
215151_at	AB014594	dedicator of cytokinesis 10	DOCK10	55619	---
215172_at	AL050040	protein tyrosine phosphatase, non-receptor type 20B /// protein tyrosine phosphatase, non-receptor type 20A	PTPN20B /// PTPN20A		6470 // protein amino acid dephosphorylation // inferred from electronic annotation
215188_at	AF339785	serine/threonine kinase 24 (STE20 homolog, yeast)	STK24	8428	6468 // protein amino acid phosphorylation // inferred from electronic annotation /// 7165 // signal transduction // traceable author statement
215241_at	AJ300461	transmembrane protein 16C	TMEM16C	63982	---
215321_at	AI825798	Rap2-binding protein 9	RPIB9	154661	---
215350_at	AB033088	spectrin repeat containing, nuclear envelope 1	SYNE1	23345	6997 // nuclear organization and biogenesis // non-traceable author statement /// 7030 // Golgi organization and biogenesis // inferred from direct assay /// 42692 // muscle cell differentiation // inferred from direct assay
215388_s_at	X56210	complement factor H /// complement factor H-related 1	CFH /// CFHR1		6957 // complement activation, alternative pathway // inferred from electronic annotation /// 45087 // innate immune response // inferred from electronic annotation /// 6956 // complement activation // traceable author statement /// 6955 // immune response // inferred from electronic annotation
215401_at	AU147698	Solute carrier family 7 (cationic amino acid transporter, y+ system), member 1	SLC7A1	6541	6520 // amino acid metabolism // not recorded /// 6810 // transport // inferred from electronic annotation /// 6810 // transport // non-traceable author statement /// 6865 // amino acid transport // inferred from electronic annotation
215443_at	BE740743	thyroid stimulating hormone receptor	TSHR	7253	7165 // signal transduction // inferred from electronic annotation /// 7187 // G-protein signaling, coupled to cyclic nucleotide second messenger // traceable author statement /// 7267 // cell-cell signaling // traceable author statement /// 8284 // positive regulation of cell proliferation // traceable author statement /// 7186 // G-protein coupled receptor protein signaling pathway // inferred …
215446_s_at	L16895	lysyl oxidase	LOX	4015	6464 // protein modification // traceable author statement /// 7169 // transmembrane receptor protein tyrosine kinase signaling pathway // non-traceable author statement
215514_at	AL080072	MRNA; cDNA DKFZp564M0616 (from clone DKFZp564M0616)	---		---
215543_s_at	AB011181	like-glycosyltransferase	LARGE	9215	6044 // N-acetylglucosamine metabolism // traceable author statement /// 6486 // protein amino acid glycosylation // traceable author statement /// 6688 // glycosphingolipid biosynthesis // traceable author statement /// 7268 // synaptic transmission // inferred from sequence or structural similarity /// 7605 // sensory perception of sound // inferred from sequence or structural similarity /// 16…
215574_at	AU144294	Hypothetical protein LOC646089	LOC646089	646089	---
215646_s_at	R94644	chondroitin sulfate proteoglycan 2 (versican) /// chondroitin sulfate proteoglycan 2 (versican)	CSPG2	1462	7155 // cell adhesion // traceable author statement /// 7275 // development // traceable author statement /// 8037 // cell recognition // traceable author statement /// 7155 // cell adhesion // inferred from electronic annotation
215655_at	AU156204	Glutamate receptor, ionotropic, kainate 2	GRIK2	2898	6811 // ion transport // inferred from electronic annotation /// 7215 // glutamate signaling pathway // traceable author statement /// 7268 // synaptic transmission // traceable author statement /// 31557 // induction of programmed cell death in response to chemical stimulus // non-traceable author statement /// 48172 // regulation of short-term neuronal synaptic plasticity // inferred from mutan…
215664_s_at	X95425	EPH receptor A5	EPHA5	2044	6468 // protein amino acid phosphorylation // traceable author statement /// 7169 // transmembrane receptor protein tyrosine kinase signaling pathway // inferred from electronic annotation /// 6468 // protein amino acid phosphorylation // inferred from electronic annotation
215666_at	U70544	major histocompatibility complex, class II, DR beta 4	HLA-DRB4	3126	6955 // immune response // inferred from electronic annotation /// 7165 // signal transduction // non-traceable author statement /// 9405 // pathogenesis // traceable author statement /// 19884 // antigen presentation, exogenous antigen // inferred from electronic annotation /// 19886 // antigen processing, exogenous antigen via MHC class II // inferred from electronic annotation
215686_x_at	AL031224	transcription factor AP-2 beta (activating enhancer binding protein 2 beta)	TFAP2B	7021	6350 // transcription // inferred from electronic annotation /// 6357 // regulation of transcription from RNA polymerase II promoter // traceable author statement /// 7399 // nervous system development // traceable author statement /// 6355 // regulation of transcription, DNA-dependent // inferred from electronic annotation
215719_x_at	X83493	Fas (TNF receptor superfamily, member 6)	FAS	355	6461 // protein complex assembly // traceable author statement /// 6915 // apoptosis // inferred from electronic annotation /// 6916 // anti-apoptosis // traceable author statement /// 6917 // induction of apoptosis // traceable author statement /// 6955 // immune response // inferred from electronic annotation /// 7165 // signal transduction // inferred from electronic annotation /// 7165 // sig…
215723_s_at	AJ276230	phospholipase D1, phosphatidylcholine-specific	PLD1	5337	6644 // phospholipid metabolism // not recorded /// 6935 // chemotaxis // traceable author statement /// 7265 // Ras protein signal transduction // traceable author statement /// 8152 // metabolism // inferred from electronic annotation /// 16042 // lipid catabolism // inferred from electronic annotation /// 7242 // intracellular signaling cascade // inferred from electronic annotation /// 7264 /…
215767_at	AF052145	chromosome 2 open reading frame 10	C2orf10	91752	---
215801_at	AL133604	MRNA; cDNA DKFZp434G1615 (from clone DKFZp434G1615)	---		---
215813_s_at	S36219	prostaglandin-endoperoxide synthase 1 (prostaglandin G/H synthase and cyclooxygenase)	PTGS1	5742	1516 // prostaglandin biosynthesis // inferred from electronic annotation /// 1516 // prostaglandin biosynthesis // inferred from sequence or structural similarity /// 6629 // lipid metabolism // non-traceable author statement /// 6633 // fatty acid biosynthesis // inferred from electronic annotation /// 7582 // physiological process // traceable author statement /// 8217 // blood pressure regula…
215913_s_at	AK023668	GULP, engulfment adaptor PTB domain containing 1	GULP1	51454	6911 // phagocytosis, engulfment // inferred from direct assay /// 6911 // phagocytosis, engulfment // traceable author statement /// 6915 // apoptosis // traceable author statement
216000_at	AA732995	KIAA0484 protein	KIAA0484	57240	---
216017_s_at	AJ011081	NGFI-A binding protein 2 (EGR1 binding protein 2)	NAB2	4665	6350 // transcription // inferred from electronic annotation /// 6355 // regulation of transcription, DNA-dependent // inferred from electronic annotation /// 7399 // nervous system development // traceable author statement /// 8283 // cell proliferation // traceable author statement /// 16481 // negative regulation of transcription // inferred from electronic annotation
216020_at	AL080107	Interferon induced with helicase C domain 1	IFIH1	64135	9615 // response to virus // inferred from electronic annotation /// 42981 // regulation of apoptosis // inferred from electronic annotation /// 45087 // innate immune response // inferred from electronic annotation /// 6955 // immune response // inferred from electronic annotation
216039_at	D38503	postmeiotic segregation increased 2-like 1	PMS2L1	5379	6298 // mismatch repair // inferred from electronic annotation /// 6298 // mismatch repair // traceable author statement
216255_s_at	AC000099	glutamate receptor, metabotropic 8	GRM8	2918	7165 // signal transduction // inferred from electronic annotation /// 7186 // G-protein coupled receptor protein signaling pathway // inferred from electronic annotation /// 7194 // negative regulation of adenylate cyclase activity // traceable author statement /// 7268 // synaptic transmission // not recorded /// 7601 // visual perception // traceable author statement /// 7608 // sensory percep…
216268_s_at	U77914	jagged 1 (Alagille syndrome)	JAG1	182	1525 // angiogenesis // non-traceable author statement /// 1709 // cell fate determination // non-traceable author statement /// 7154 // cell communication // inferred from electronic annotation /// 7219 // Notch signaling pathway // non-traceable author statement /// 7275 // development // non-traceable author statement /// 7399 // nervous system development // non-traceable author statement ///…
216307_at	AB018261	diacylglycerol kinase, beta 90kDa	DGKB	1607	7205 // protein kinase C activation // inferred from electronic annotation /// 7242 // intracellular signaling cascade // inferred from electronic annotation
216331_at	AK022548	integrin, alpha 7	ITGA7	3679	7155 // cell adhesion // inferred from electronic annotation /// 7156 // homophilic cell adhesion // not recorded /// 7160 // cell-matrix adhesion // traceable author statement /// 7229 // integrin-mediated signaling pathway // inferred from electronic annotation /// 7517 // muscle development // traceable author statement /// 8360 // regulation of cell shape // inferred from electronic annotation
216373_at	AF189251	hypothetical protein FLJ90013	FLJ90013	202018	---
216379_x_at	AK000168	CD24 molecule	CD24	934	6959 // humoral immune response // traceable author statement
216405_at	M14087	lectin, galactoside-binding, soluble, 1 (galectin 1)	LGALS1	3956	42981 // regulation of apoptosis // traceable author statement /// 43123 // positive regulation of I-kappaB kinase/NF-kappaB cascade // inferred from mutant phenotype /// 45445 // myoblast differentiation // inferred from direct assay /// 6915 // apoptosis // traceable author statement /// 7157 // heterophilic cell adhesion // non-traceable author statement
216442_x_at	AK026737	fibronectin 1	FN1	2335	6953 // acute-phase response // inferred from electronic annotation /// 7155 // cell adhesion // non-traceable author statement /// 7169 // transmembrane receptor protein tyrosine kinase signaling pathway // non-traceable author statement /// 8152 // metabolism // inferred from electronic annotation /// 9611 // response to wounding // non-traceable author statement /// 16477 // cell migration // …
216462_at	X79200	---	---		6350 // transcription // inferred from electronic annotation /// 6355 // regulation of transcription, DNA-dependent // inferred from electronic annotation /// 6355 // regulation of transcription, DNA-dependent // non-traceable author statement
216526_x_at	AK024836	major histocompatibility complex, class I, C	HLA-C	3107	19882 // antigen presentation // inferred from electronic annotation /// 19883 // antigen presentation, endogenous antigen // inferred from electronic annotation /// 19885 // antigen processing, endogenous antigen via MHC class I // inferred from electronic annotation /// 6955 // immune response // inferred from electronic annotation /// 6955 // immune response // non-traceable author statement
216603_at	AL365343	solute carrier family 7 (cationic amino acid transporter, y+ system), member 8	SLC7A8	23428	6461 // protein complex assembly // not recorded /// 6520 // amino acid metabolism // traceable author statement /// 6810 // transport // inferred from electronic annotation /// 6810 // transport // traceable author statement /// 6865 // amino acid transport // inferred from electronic annotation /// 15804 // neutral amino acid transport // inferred from sequence or structural similarity
216623_x_at	AK025084	trinucleotide repeat containing 9	TNRC9	27324	6355 // regulation of transcription, DNA-dependent // inferred from electronic annotation
216705_s_at	X02189	adenosine deaminase	ADA	100	9117 // nucleotide metabolism // inferred from electronic annotation /// 9168 // purine ribonucleoside monophosphate biosynthesis // inferred from electronic annotation /// 19735 // antimicrobial humoral response (sensu Vertebrata) // traceable author statement
216737_at	AK024525	CDNA: FLJ20872 fis, clone ADKA02604	---		---
216831_s_at	AF018283	runt-related transcription factor 1; translocated to, 1 (cyclin D-related)	RUNX1T1	862	6091 // generation of precursor metabolites and energy // traceable author statement /// 6350 // transcription // inferred from electronic annotation /// 6355 // regulation of transcription, DNA-dependent // inferred from electronic annotation /// 30854 // positive regulation of granulocyte differentiation // inferred from mutant phenotype /// 30097 // hemopoiesis // inferred from sequence or str…
216834_at	S59049	regulator of G-protein signalling 1	RGS1	5996	6955 // immune response // traceable author statement /// 7165 // signal transduction // non-traceable author statement /// 7193 // G-protein signaling, adenylate cyclase inhibiting pathway // traceable author statement /// 9968 // negative regulation of signal transduction // inferred from electronic annotation
216840_s_at	AK026829	laminin, alpha 2 (merosin, congenital muscular dystrophy)	LAMA2	3908	7517 // muscle development // traceable author statement /// 30155 // regulation of cell adhesion // inferred from electronic annotation /// 30334 // regulation of cell migration // inferred from electronic annotation /// 45995 // regulation of embryonic development // inferred from electronic annotation /// 7155 // cell adhesion // inferred from electronic annotation
216884_at	S69182	protein tyrosine phosphatase, non-receptor type 12	PTPN12	5782	6470 // protein amino acid dephosphorylation // traceable author statement /// 6470 // protein amino acid dephosphorylation // inferred from electronic annotation
216901_s_at	S80876	IKAROS family zinc finger 1 (Ikaros)	IKZF1	10320	6350 // transcription // inferred from electronic annotation /// 6355 // regulation of transcription, DNA-dependent // inferred from electronic annotation /// 7498 // mesoderm development // traceable author statement
216959_x_at	U55258	neuronal cell adhesion molecule	NRCAM	4897	1764 // neuron migration // non-traceable author statement /// 7413 // axonal fasciculation // non-traceable author statement /// 7416 // synaptogenesis // traceable author statement /// 7417 // central nervous system development // non-traceable author statement /// 16337 // cell-cell adhesion // non-traceable author statement /// 30516 // regulation of axon extension // non-traceable author sta…
216973_s_at	S49765	homeobox B7	HOXB7	3217	6355 // regulation of transcription, DNA-dependent // inferred from electronic annotation /// 6355 // regulation of transcription, DNA-dependent // non-traceable author statement /// 7275 // development // non-traceable author statement /// 6350 // transcription // inferred from electronic annotation /// 7275 // development // inferred from electronic annotation /// 45449 // regulation of transcr…
217028_at	AJ224869	chemokine (C-X-C motif) receptor 4	CXCR4	7852	7165 // signal transduction // inferred from electronic annotation /// 7186 // G-protein coupled receptor protein signaling pathway // inferred from electronic annotation
217076_s_at	Y09980	---	---		6350 // transcription // inferred from electronic annotation /// 6355 // regulation of transcription, DNA-dependent // inferred from electronic annotation /// 7275 // development // inferred from electronic annotation /// 45449 // regulation of transcription // inferred from electronic annotation /// 9653 // morphogenesis // not recorded
217147_s_at	AJ240085	T cell receptor associated transmembrane adaptor 1	TRAT1	50852	1920 // negative regulation of receptor recycling // inferred from direct assay /// 6955 // immune response // inferred from electronic annotation /// 50850 // positive regulation of calcium-mediated signaling // inferred from direct assay /// 50862 // positive regulation of T cell receptor signaling pathway // inferred from direct assay /// 51051 // negative regulation of transport // inferred f…
217388_s_at	D55639	kynureninase (L-kynurenine hydrolase)	KYNU	8942	6569 // tryptophan catabolism // inferred from electronic annotation /// 8152 // metabolism // inferred from electronic annotation /// 9435 // NAD biosynthesis // inferred from electronic annotation /// 19363 // pyridine nucleotide biosynthesis // inferred from electronic annotation /// 6569 // tryptophan catabolism // not recorded
217404_s_at	X16468	collagen, type II, alpha 1 (primary osteoarthritis, spondyloepiphyseal dysplasia, congenital)	COL2A1	1280	1501 // skeletal development // traceable author statement /// 6817 // phosphate transport // inferred from electronic annotation /// 7605 // sensory perception of sound // inferred from electronic annotation
217452_s_at	Y15014	UDP-Gal:betaGlcNAc beta 1,3-galactosyltransferase, polypeptide 2	B3GALT2	8707	6486 // protein amino acid glycosylation // traceable author statement /// 6486 // protein amino acid glycosylation // inferred from electronic annotation
217546_at	R06655	metallothionein 1M	MT1M	4499	---
217552_x_at	AI432713	complement component (3b/4b) receptor 1 (Knops blood group)	CR1	1378	6958 // complement activation, classical pathway // inferred from electronic annotation /// 45087 // innate immune response // inferred from electronic annotation /// 6955 // immune response // inferred from electronic annotation /// 6956 // complement activation // traceable author statement
217562_at	BF589529	family with sequence similarity 5, member C	FAM5C	339479	---
217572_at	AA654586	---	---		---
217599_s_at	BE910600	MyoD family inhibitor domain containing	MDFIC	29969	9615 // response to virus // non-traceable author statement
217617_at	AW451711	Pre-B-cell leukemia transcription factor 1	PBX1	5087	6355 // regulation of transcription, DNA-dependent // inferred from electronic annotation /// 6366 // transcription from RNA polymerase II promoter // not recorded /// 6700 // C21-steroid hormone biosynthesis // inferred from electronic annotation /// 7548 // sex differentiation // inferred from electronic annotation /// 9790 // embryonic development // inferred from sequence or structural simila…
217621_at	AI399889	---	---		---
217683_at	AA115963	Hemoglobin, epsilon 1	HBE1	3046	6810 // transport // inferred from electronic annotation /// 15671 // oxygen transport // inferred from electronic annotation
217757_at	NM_000014	alpha-2-macroglobulin	A2M	2	6886 // intracellular protein transport // not recorded /// 51260 // protein homooligomerization // non-traceable author statement
217762_s_at	BE789881	RAB31, member RAS oncogene family	RAB31	11031	7264 // small GTPase mediated signal transduction // inferred from electronic annotation /// 15031 // protein transport // inferred from electronic annotation
217763_s_at	NM_006868	RAB31, member RAS oncogene family	RAB31	11031	7264 // small GTPase mediated signal transduction // inferred from electronic annotation /// 15031 // protein transport // inferred from electronic annotation
217764_s_at	AF183421	RAB31, member RAS oncogene family	RAB31	11031	7264 // small GTPase mediated signal transduction // inferred from electronic annotation /// 15031 // protein transport // inferred from electronic annotation
[truncated: 1,310 more rows]
